# Supplementary material for: Mechanism and origins of stereo- and enantioselectivities of palladium-catalyzed hydroamination of racemic internal allenes via dynamic kinetic resolution: a computational study
Source: Royal Society of Chemistry journal article supplement (doi:10.1039/d0qo00174k), 2020-01-01
Supplement: d0qo00174k1.pdf [file d0qo00174k1.pdf]

## *Supporting Information*

### **Mechanism and Origins of Stereo- and Enantioselectivities of Palladium-Catalyzed Hydroamination of Racemic Internal Allenes via Dynamic Kinetic Resolution: A Computational Study**

Zhenzhen Wu, Mei Zhang, Yu Shi, Genping Huang\*

*Department of Chemistry, School of Science and Tianjin Key Laboratory of Molecular Optoelectronic Sciences, Tianjin University, Tianjin 300072, P. R. China*

gphuang@tju.edu.cn

#### **Table of Contents:**

|                                                                                                                    |            |
|--------------------------------------------------------------------------------------------------------------------|------------|
| <b>1. C-Cl reductive elimination</b>                                                                               | <b>S2</b>  |
| <b>2. Other possibilities of <math>\eta^3</math>-<math>\eta^1</math>-<math>\eta^3</math> allylic isomerization</b> | <b>S3</b>  |
| <b>3. Other possibilities of protonation</b>                                                                       | <b>S4</b>  |
| <b>4. Other possibilities of nucleophilic attack</b>                                                               | <b>S5</b>  |
| <b>5. C-N reductive elimination</b>                                                                                | <b>S6</b>  |
| <b>6. Racemization in the absence of the pyrazole substrate</b>                                                    | <b>S7</b>  |
| <b>7. Table of calculated energies and energy corrections</b>                                                      | <b>S8</b>  |
| <b>8. Cartesian coordinates</b>                                                                                    | <b>S10</b> |

## 1. C-Cl reductive elimination.

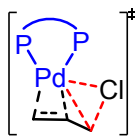

22.7

## 2. Other possibilities of $\eta^3$ - $\eta^1$ - $\eta^3$ allylic isomerization.

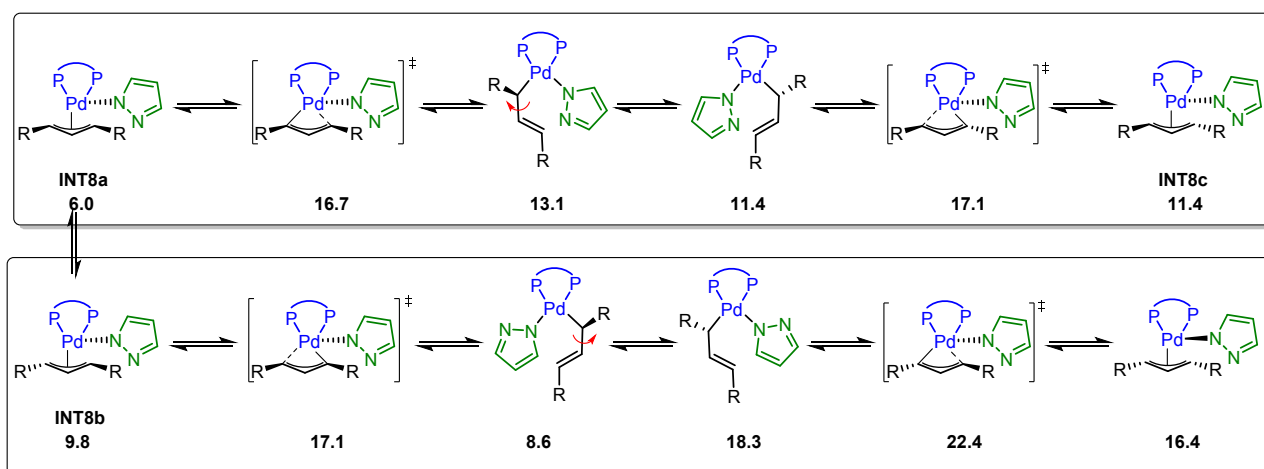

### 3. Other possibilities of protonation.

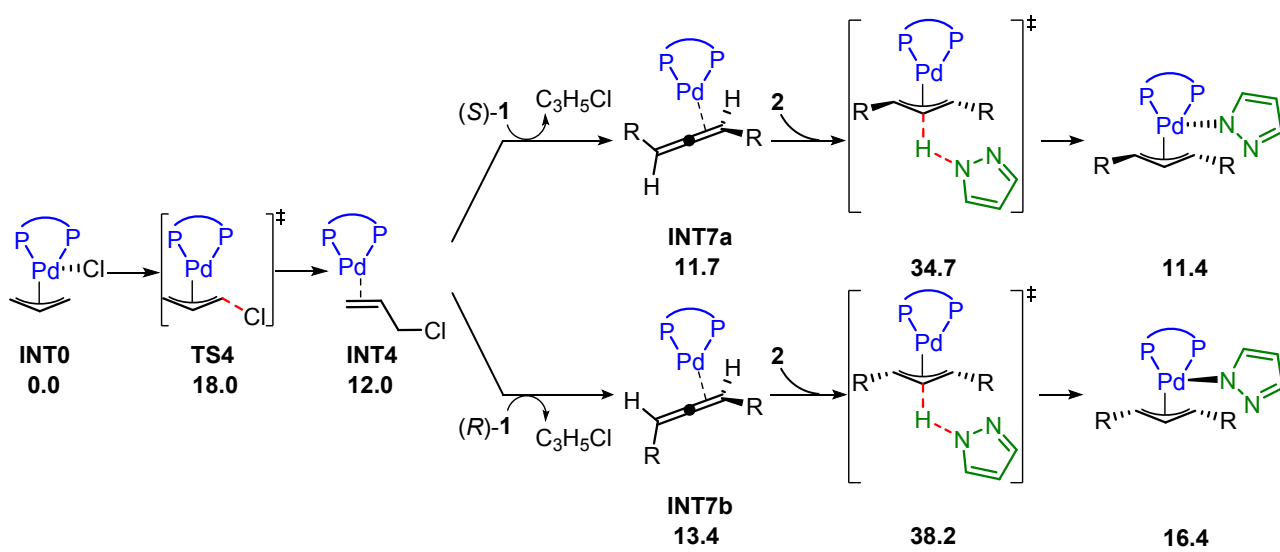

#### 4. Other possibilities of nucleophilic attack.

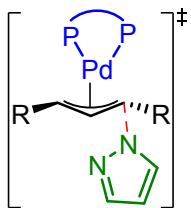

20.9

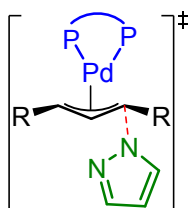

24.3

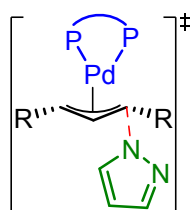

28.0

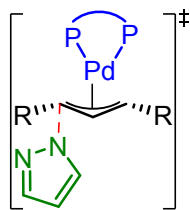

22.1

## 5. C-N reductive elimination.

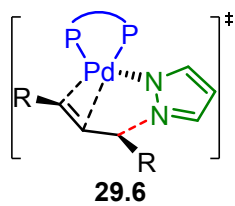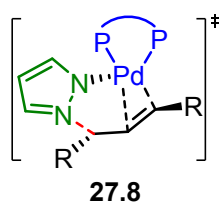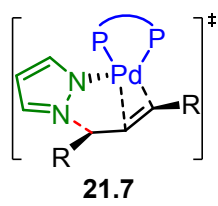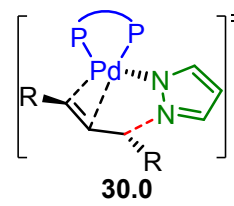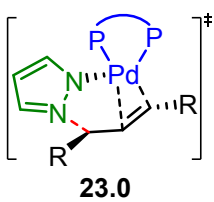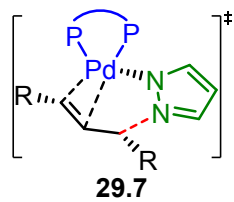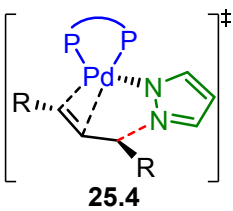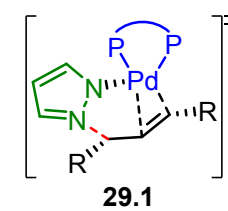

## 6. Racemization in the absence of the pyrazole substrate

As shown in below, **INT2** undergoes the ligand exchange step with (*R*)-**1a** to afford intermediate **INT11**, from which the protonation of the central carbon of allene using HCl as the proton source takes place through transition state **TS10**, leading to  $\eta^3$ -allyl Pd(II) complex **INT12**. The subsequent  $\eta^3$ - $\eta^1$ - $\eta^3$  allylic isomerization to give intermediate **INT14** is quite feasible. Finally, the deprotonation of the central carbon of the allyl ligand via **TS13** delivers intermediate **INT15**, from which the ligand exchange with propadiene could release (*S*)-**1a**.

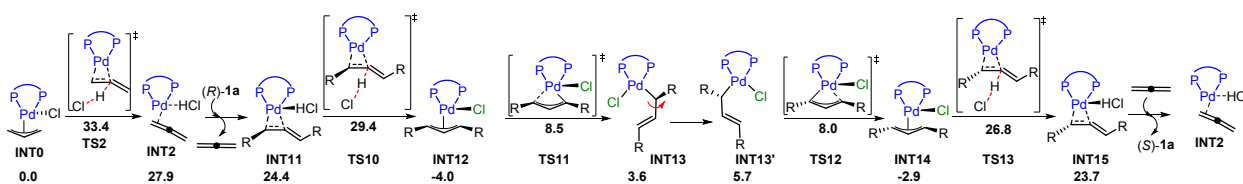

The computations show that the formation of **INT2** via **TS2** is the rate-determining step of this process, with an energy barrier of 33.4 kcal/mol relative to **INT0**, which can take place under the reaction conditions. However, since that the energy barrier is 3.2 kcal/mol higher than the process with the pyrazole substrate, this process is less likely to occur in the presence of the pyrazole substrate.

## 7. Table of calculated energies and energy corrections

| Stationary point                 | Single-point energy<br>M06/6-311++G( <i>d,p</i> ), SDD<br>(a.u.) | Thermal correction to Gibbs free energy<br>B3LYP-(D3)BJ/6-31G( <i>d</i> ),<br>LANL2DZ<br>(a.u.) |
|----------------------------------|------------------------------------------------------------------|-------------------------------------------------------------------------------------------------|
| (R)-1                            | -735.604813                                                      | 0.283884                                                                                        |
| (S)-1                            | -735.6048196                                                     | 0.283472                                                                                        |
| 2                                | -226.104244                                                      | 0.045253                                                                                        |
| propadiene                       | -116.590101                                                      | 0.032005                                                                                        |
| INT0                             | -3153.081546                                                     | 0.558205                                                                                        |
| TS1                              | -3153.010319                                                     | 0.550265                                                                                        |
| INT1                             | -3036.425417                                                     | 0.498367                                                                                        |
| TS2                              | -3153.016510                                                     | 0.546464                                                                                        |
| INT2                             | -3153.027383                                                     | 0.548458                                                                                        |
| INT3                             | -3036.397263                                                     | 0.492791                                                                                        |
| TS3                              | -3036.393742                                                     | 0.491475                                                                                        |
| TS4                              | -3153.050077                                                     | 0.555380                                                                                        |
| INT4                             | -3153.060877                                                     | 0.556722                                                                                        |
| INT5                             | -2801.712204                                                     | 0.554215                                                                                        |
| C <sub>3</sub> H <sub>5</sub> Cl | -577.427825                                                      | 0.043936                                                                                        |
| TS5                              | -2801.669382                                                     | 0.548257                                                                                        |
| INT6                             | -2801.696768                                                     | 0.553852                                                                                        |
| INT7a                            | -3311.242880                                                     | 0.801130                                                                                        |
| TS6a                             | -3537.331104                                                     | 0.864504                                                                                        |
| INT8a                            | -3537.371843                                                     | 0.871869                                                                                        |
| INT7b                            | -3311.237875                                                     | 0.798796                                                                                        |
| TS6b                             | -3537.327721                                                     | 0.866398                                                                                        |
| INT8b                            | -3537.366055                                                     | 0.872250                                                                                        |
| TS7                              | -3537.356435                                                     | 0.870771                                                                                        |
| INT9                             | -3537.357501                                                     | 0.868157                                                                                        |
| TS8                              | -3537.354977                                                     | 0.867698                                                                                        |
| INT9'                            | -3537.360046                                                     | 0.866220                                                                                        |
| (E)-(S)-TS9                      | -3537.347548                                                     | 0.866279                                                                                        |
| (E)-(S)-INT10                    | -3537.402010                                                     | 0.873117                                                                                        |
| (E)-(S)-3                        | -961.759074                                                      | 0.352641                                                                                        |
| (E)-(R)-TS9                      | -3537.343752                                                     | 0.866332                                                                                        |
| (E)-(R)-INT10                    | -3537.402635                                                     | 0.874479                                                                                        |



|                      |                     |                 |
|----------------------|---------------------|-----------------|
| <b>(E)-(R)-3</b>     | <b>-961.760065</b>  | <b>0.354108</b> |
| <b>INT8c</b>         | <b>-3537.364646</b> | <b>0.873261</b> |
| <b>(Z)-(S)-TS9</b>   | <b>-3537.348641</b> | <b>0.870934</b> |
| <b>(Z)-(S)-INT10</b> | <b>-3537.404930</b> | <b>0.876883</b> |
| <b>(Z)-(S)-3</b>     | <b>-961.758112</b>  | <b>0.353795</b> |
| <b>(Z)-(R)-TS9</b>   | <b>-3537.346446</b> | <b>0.871193</b> |
| <b>(Z)-(R)-INT10</b> | <b>-3537.398861</b> | <b>0.873374</b> |
| <b>(Z)-(R)-3</b>     | <b>-961.760253</b>  | <b>0.356676</b> |

## 8. Cartesian coordinates

### (R)-1

|   |             |             |             |
|---|-------------|-------------|-------------|
| C | 1.04229300  | 0.63474900  | 0.78085200  |
| C | -0.20945300 | 0.33396100  | 0.54187700  |
| H | -0.50221100 | 0.04418900  | -0.46969300 |
| C | 2.28505000  | 0.95709900  | 1.03816700  |
| H | 2.98390200  | 0.17907800  | 1.35305000  |
| C | -1.31733900 | 0.39780600  | 1.56819100  |
| H | -0.89560700 | 0.56696200  | 2.56467700  |
| H | -1.84724600 | -0.56398300 | 1.60102800  |
| C | -2.33942900 | 1.51279600  | 1.24755800  |
| H | -1.81403300 | 2.47512800  | 1.24007900  |
| H | -2.73303100 | 1.35629400  | 0.23545400  |
| C | -3.47349200 | 1.54289700  | 2.24435300  |
| C | -3.35454400 | 2.26329400  | 3.44036500  |
| C | -4.64633500 | 0.81041700  | 2.02007300  |
| C | -4.37986700 | 2.25457500  | 4.38685500  |
| H | -2.45037600 | 2.83835400  | 3.62696400  |
| C | -5.67532200 | 0.79836700  | 2.96310100  |
| H | -4.75341600 | 0.24805800  | 1.09524100  |
| C | -5.54490000 | 1.52102600  | 4.15089300  |
| H | -4.27127900 | 2.82339800  | 5.30631500  |
| H | -6.57958100 | 0.22794500  | 2.76888300  |
| H | -6.34566900 | 1.51574000  | 4.88495500  |
| C | 2.85225000  | 2.35050000  | 0.88870000  |
| H | 3.31407500  | 2.66547800  | 1.83460500  |
| H | 2.04598000  | 3.05993300  | 0.67360600  |
| C | 3.91724400  | 2.42875600  | -0.22888600 |
| H | 4.71597300  | 1.70835700  | -0.01213100 |
| H | 3.45580900  | 2.11888600  | -1.17380800 |
| C | 4.49431700  | 3.81810200  | -0.36087300 |
| C | 3.88744100  | 4.76727700  | -1.19387900 |
| C | 5.61496700  | 4.20463000  | 0.38583500  |
| C | 4.38685400  | 6.06742000  | -1.28186300 |
| H | 3.01736200  | 4.48087800  | -1.78033800 |
| C | 6.11858000  | 5.50367800  | 0.30204300  |
| H | 6.09814800  | 3.47816400  | 1.03535700  |
| C | 5.50533900  | 6.44013000  | -0.53301900 |
| H | 3.90539000  | 6.78798500  | -1.93740800 |
| H | 6.99169700  | 5.78332200  | 0.88536600  |
| H | 5.89771800  | 7.45074800  | -0.60227100 |

### (S)-1

|   |             |             |             |
|---|-------------|-------------|-------------|
| C | 1.09741200  | 0.69792700  | 1.16526000  |
| C | -0.12676400 | 0.34973700  | 0.85751900  |
| H | -0.33462500 | -0.02984800 | -0.14541100 |

|                   |             |             |             |
|-------------------|-------------|-------------|-------------|
| C                 | 2.31891200  | 1.02733900  | 1.50300800  |
| H                 | 2.66210700  | 2.04919800  | 1.32681400  |
| C                 | -1.31246100 | 0.46737700  | 1.78773800  |
| H                 | -0.97685500 | 0.76788100  | 2.78597200  |
| H                 | -1.79629700 | -0.51356900 | 1.89276700  |
| C                 | -2.36091200 | 1.47829400  | 1.27003000  |
| H                 | -1.88767100 | 2.46369400  | 1.18790000  |
| H                 | -2.66727500 | 1.18596800  | 0.25773200  |
| C                 | -3.56759600 | 1.55119500  | 2.17533600  |
| C                 | -3.60838800 | 2.45730800  | 3.24307400  |
| C                 | -4.64812700 | 0.67654600  | 2.00030600  |
| C                 | -4.69959100 | 2.49136900  | 4.11264400  |
| H                 | -2.77711300 | 3.14302700  | 3.39040000  |
| C                 | -5.74160300 | 0.70587400  | 2.86692800  |
| H                 | -4.63144000 | -0.03106700 | 1.17440000  |
| C                 | -5.77061300 | 1.61448000  | 3.92725800  |
| H                 | -4.71497800 | 3.20439300  | 4.93247700  |
| H                 | -6.57222500 | 0.02255200  | 2.71227300  |
| H                 | -6.62215900 | 1.64124500  | 4.60125400  |
| C                 | 3.33062700  | 0.07284500  | 2.09509200  |
| H                 | 4.17156883  | -0.05598892 | 1.40544099  |
| H                 | 2.87031227  | -0.91573986 | 2.22950857  |
| C                 | 3.85836093  | 0.55942239  | 3.46422240  |
| H                 | 4.33438355  | 1.53755481  | 3.32817952  |
| H                 | 3.00791498  | 0.70951414  | 4.14110405  |
| C                 | 4.83629531  | -0.41846303 | 4.07074049  |
| C                 | 4.38889450  | -1.47048395 | 4.88086470  |
| C                 | 6.20630536  | -0.32643432 | 3.79230763  |
| C                 | 5.28504626  | -2.40553276 | 5.40080593  |
| H                 | 3.32840505  | -1.55337184 | 5.10804295  |
| C                 | 7.10704118  | -1.25854533 | 4.30973299  |
| H                 | 6.56807368  | 0.48613280  | 3.16636595  |
| C                 | 6.64848944  | -2.30238925 | 5.11633532  |
| H                 | 4.91965756  | -3.21183096 | 6.03101964  |
| H                 | 8.16653743  | -1.16788251 | 4.08614479  |
| H                 | 7.34806732  | -3.02739108 | 5.52264755  |
| <b>2</b>          |             |             |             |
| C                 | 0.73738200  | -1.55851900 | 0.00000900  |
| C                 | 2.12062200  | -1.56172500 | 0.00003700  |
| C                 | 2.47852300  | -0.19374900 | -0.00003000 |
| N                 | 0.36218300  | -0.25345700 | -0.00007000 |
| H                 | -0.57606600 | 0.11845800  | -0.00011000 |
| H                 | 0.01159600  | -2.35859400 | 0.00003600  |
| H                 | 2.77209400  | -2.42303400 | 0.00009600  |
| H                 | 3.46862200  | 0.24308500  | -0.00003500 |
| N                 | 1.40743300  | 0.60294500  | -0.00009100 |
| <b>propadiene</b> |             |             |             |
| C                 | -0.66427800 | 0.95206400  | 0.00000000  |
| C                 | 0.64281600  | 0.95206400  | 0.00000000  |
| C                 | 1.94991100  | 0.95206400  | 0.00000000  |
| H                 | 2.51943300  | 1.00590900  | -0.92585500 |
| H                 | 2.51943300  | 0.89821900  | 0.92585500  |
| H                 | -1.23380000 | 1.87791600  | 0.05389700  |
| H                 | -1.23380000 | 0.02621200  | -0.05389700 |
| <b>INTO</b>       |             |             |             |
| P                 | -1.27042400 | 1.63722300  | -0.13917400 |
| C                 | -2.27148200 | 0.39854500  | -1.06119000 |
| C                 | -1.46263400 | 3.18035100  | -1.11162000 |

|   |             |             |             |
|---|-------------|-------------|-------------|
| C | -2.25115100 | 1.87606300  | 1.38244400  |
| C | -2.54765700 | -0.85696300 | -0.44039200 |
| C | -2.69904700 | 0.64741800  | -2.36812300 |
| C | -2.26918500 | 4.24650700  | -0.69797600 |
| C | -0.72638100 | 3.30316300  | -2.30292500 |
| C | -1.59777200 | 1.90851000  | 2.61987900  |
| C | -3.65046100 | 1.97640800  | 1.32345700  |
| C | -3.26406200 | -1.76170700 | -1.20073100 |
| C | -2.15982700 | -1.22789000 | 0.95027800  |
| C | -3.40027400 | -0.30742600 | -3.12622000 |
| H | -2.49288100 | 1.60780800  | -2.82265700 |
| C | -2.34509800 | 5.41089300  | -1.46707400 |
| H | -2.83223600 | 4.17606600  | 0.22544800  |
| C | -0.81718900 | 4.45763200  | -3.07684300 |
| H | -0.07610800 | 2.49040000  | -2.61553300 |
| C | -2.34570900 | 2.03528400  | 3.79221900  |
| H | -0.51502800 | 1.81391800  | 2.66927800  |
| C | -4.38774100 | 2.12323300  | 2.49644000  |
| H | -4.16000100 | 1.92262200  | 0.36609200  |
| C | -3.66360500 | -1.51162400 | -2.51173000 |
| O | -3.64784700 | -3.02528400 | -0.83477300 |
| C | -3.14624400 | -1.32728800 | 1.91383800  |
| C | -0.83235200 | -1.52834900 | 1.38449400  |
| H | -3.71656600 | -0.10430000 | -4.14284600 |
| C | -1.62713100 | 5.51764700  | -2.65773200 |
| H | -2.96846800 | 6.23432500  | -1.13085700 |
| H | -0.24802800 | 4.53566600  | -3.99860300 |
| C | -3.73583000 | 2.14400300  | 3.73409700  |
| H | -1.83543800 | 2.04362200  | 4.75078800  |
| H | -5.46973100 | 2.20853100  | 2.44640400  |
| O | -4.30645100 | -2.60856900 | -3.01888600 |
| C | -4.34505700 | -3.57730000 | -1.95923600 |
| C | -2.88241800 | -1.63753700 | 3.24627400  |
| O | -4.49213800 | -1.13259600 | 1.74302600  |
| C | -0.58177800 | -1.85421900 | 2.71982100  |
| P | 0.56811300  | -1.28450600 | 0.22687700  |
| H | -1.69003800 | 6.42332800  | -3.25371600 |
| H | -4.31344900 | 2.24316000  | 4.64896100  |
| H | -3.84033600 | -4.49018200 | -2.28654900 |
| H | -5.38618000 | -3.77295500 | -1.68173400 |
| C | -1.60418000 | -1.90864700 | 3.68345300  |
| O | -4.04881100 | -1.63553500 | 3.96264000  |
| C | -5.08343700 | -1.25085200 | 3.04415400  |
| H | 0.43224700  | -2.06573300 | 3.03525000  |

|            |             |             |             |
|------------|-------------|-------------|-------------|
| C          | 1.96504200  | -2.26656700 | 0.89242500  |
| C          | 0.05430400  | -2.15332900 | -1.29655300 |
| H          | -1.39414100 | -2.15207100 | 4.71837400  |
| H          | -5.85561700 | -2.02501300 | 3.02166000  |
| H          | -5.49170800 | -0.28135500 | 3.34521700  |
| C          | 2.34641700  | -3.50500000 | 0.35624600  |
| C          | 2.70437400  | -1.71706800 | 1.95375200  |
| C          | 0.21336100  | -1.51346700 | -2.53141200 |
| C          | -0.51207000 | -3.43609100 | -1.24951900 |
| C          | 3.43892300  | -4.19259500 | 0.88786400  |
| H          | 1.80610200  | -3.93303600 | -0.47956700 |
| C          | 3.78644300  | -2.41698300 | 2.48664000  |
| C          | -0.19350300 | -2.14521700 | -3.70682800 |
| H          | 0.62863800  | -0.50988300 | -2.55636800 |
| C          | -0.90202600 | -4.07191800 | -2.42671100 |
| H          | -0.66754900 | -3.92443600 | -0.29272200 |
| C          | 4.15701100  | -3.65512300 | 1.95707400  |
| H          | 3.72769800  | -5.14922000 | 0.46162000  |
| H          | 4.34575200  | -1.98394200 | 3.31099400  |
| C          | -0.74929300 | -3.42493900 | -3.65617600 |
| H          | -0.08496000 | -1.63560000 | -4.65959400 |
| H          | -1.33279100 | -5.06818700 | -2.38403000 |
| H          | 5.00582600  | -4.19382600 | 2.36875600  |
| H          | -1.06891300 | -3.91545800 | -4.57087900 |
| H          | 2.44012900  | -0.73849100 | 2.35118600  |
| Pd         | 0.98958100  | 0.99812400  | 0.00553800  |
| Cl         | 1.88324600  | 1.55361400  | 2.85689500  |
| C          | 2.71035300  | 2.00321900  | -1.00441700 |
| C          | 1.99926300  | 2.99245500  | -0.30215800 |
| C          | 3.18548600  | 0.86267000  | -0.32078400 |
| H          | 2.65087100  | 1.98049900  | -2.09135800 |
| H          | 2.18968600  | 3.16014200  | 0.75418400  |
| H          | 1.47502300  | 3.76827000  | -0.84960400 |
| H          | 3.57393200  | 0.02046600  | -0.88478500 |
| H          | 3.46843600  | 0.93059400  | 0.72546100  |
| <b>TS1</b> |             |             |             |
| P          | -3.37665300 | 0.28360700  | 0.03714400  |
| C          | -4.41286800 | -0.92012500 | -0.88781400 |
| C          | -3.55107200 | 1.84303400  | -0.91415100 |
| C          | -4.31626700 | 0.51627900  | 1.58435300  |
| C          | -4.74248200 | -2.16775100 | -0.27731600 |
| C          | -4.81129900 | -0.64898100 | -2.19981000 |
| C          | -4.43583000 | 2.86542600  | -0.55393400 |
| C          | -2.74112400 | 2.00657700  | -2.05016800 |
| C          | -3.63438800 | 0.52722300  | 2.80703000  |

|   |             |             |             |
|---|-------------|-------------|-------------|
| C | -5.71535100 | 0.63381300  | 1.55886400  |
| C | -5.48625900 | -3.03902600 | -1.05056400 |
| C | -4.36773000 | -2.56735600 | 1.10880100  |
| C | -5.53964500 | -1.57175200 | -2.97109800 |
| H | -4.55803200 | 0.30377800  | -2.64715800 |
| C | -4.51047000 | 4.03147100  | -1.32058700 |
| H | -5.05648700 | 2.76405200  | 0.32878000  |
| C | -2.83092700 | 3.16177100  | -2.82354300 |
| H | -2.03686700 | 1.22444200  | -2.31846000 |
| C | -4.35428700 | 0.65060100  | 3.99701000  |
| H | -2.55217800 | 0.42044300  | 2.82796700  |
| C | -6.42370900 | 0.77886600  | 2.74970500  |
| H | -6.24855100 | 0.59083300  | 0.61407000  |
| C | -5.86044600 | -2.76633600 | -2.36465700 |
| O | -5.91950800 | -4.29040000 | -0.69802400 |
| C | -5.35396700 | -2.65197500 | 2.07404800  |
| C | -3.04786500 | -2.90746100 | 1.53571800  |
| H | -5.83237900 | -1.35317500 | -3.99152900 |
| C | -3.71540800 | 4.18050700  | -2.45667000 |
| H | -5.19160300 | 4.82387400  | -1.02434200 |
| H | -2.20423600 | 3.27175000  | -3.70388300 |
| C | -5.74394000 | 0.77819600  | 3.97191700  |
| H | -3.82323700 | 0.64229500  | 4.94420300  |
| H | -7.50526900 | 0.87865000  | 2.72469300  |
| O | -6.53777100 | -3.83516300 | -2.88604200 |
| C | -6.63118600 | -4.80525100 | -1.83112100 |
| C | -5.09363700 | -2.98030300 | 3.40276400  |
| O | -6.69419600 | -2.41778800 | 1.90998000  |
| C | -2.80078400 | -3.25099800 | 2.86705700  |
| P | -1.64541100 | -2.69910200 | 0.37294500  |
| H | -3.77733100 | 5.08784600  | -3.05028000 |
| H | -6.29909300 | 0.87466500  | 4.90077900  |
| H | -6.16619400 | -5.73912900 | -2.15767400 |
| H | -7.68290000 | -4.95330000 | -1.56395700 |
| C | -3.82126100 | -3.28673700 | 3.83381600  |
| O | -6.25688800 | -2.95222100 | 4.12384600  |
| C | -7.28822200 | -2.55214800 | 3.20852200  |
| H | -1.79157100 | -3.49442800 | 3.17565900  |
| C | -0.27787600 | -3.72839000 | 1.02889500  |
| C | -2.18781500 | -3.54698900 | -1.15259900 |
| H | -3.61479600 | -3.54417800 | 4.86608800  |
| H | -8.06319400 | -3.32350400 | 3.17379300  |
| H | -7.69469900 | -1.58614800 | 3.52223000  |
| C | 0.04247400  | -4.99113000 | 0.50964300  |

|             |             |             |             |
|-------------|-------------|-------------|-------------|
| C           | 0.50235000  | -3.19164600 | 2.06739400  |
| C           | -1.99333200 | -2.91445700 | -2.38640000 |
| C           | -2.80499400 | -4.80638700 | -1.11096500 |
| C           | 1.11452100  | -5.71417600 | 1.03526000  |
| H           | -0.53025400 | -5.41088100 | -0.30857900 |
| C           | 1.56491300  | -3.92589200 | 2.59398700  |
| C           | -2.41236300 | -3.53189000 | -3.56541000 |
| H           | -1.54036900 | -1.92730300 | -2.41134700 |
| C           | -3.20796900 | -5.42798800 | -2.29127700 |
| H           | -2.98992100 | -5.28662300 | -0.15527300 |
| C           | 1.87386500  | -5.18765400 | 2.08138500  |
| H           | 1.35563300  | -6.68970000 | 0.62249200  |
| H           | 2.15737900  | -3.50156000 | 3.39945200  |
| C           | -3.01721400 | -4.78923800 | -3.51980400 |
| H           | -2.27413200 | -3.02762900 | -4.51717100 |
| H           | -3.67804500 | -6.40650400 | -2.25190300 |
| H           | 2.70705600  | -5.75377100 | 2.48813900  |
| H           | -3.34568600 | -5.26834200 | -4.43741300 |
| H           | 0.28774500  | -2.19487000 | 2.44843300  |
| Pd          | -1.14160800 | -0.38863600 | 0.15617900  |
| C           | 0.99998500  | -0.72478400 | -0.35290800 |
| C           | 0.68480500  | 0.46822200  | -0.95213200 |
| H           | -0.72829300 | 1.14372000  | -0.03306400 |
| C           | 0.89780000  | 1.48520900  | -1.76522200 |
| H           | 1.86697700  | 1.58432400  | -2.25080100 |
| H           | 0.15536300  | 2.24857300  | -1.96581400 |
| Cl          | -0.12688300 | 0.16403000  | 2.76724100  |
| H           | 1.45675800  | -0.74194500 | 0.63285900  |
| H           | 1.04581800  | -1.63231500 | -0.94899900 |
| <b>INT1</b> |             |             |             |
| P           | -1.23793900 | 1.77804300  | -0.27802400 |
| C           | -2.26874400 | 0.53262000  | -1.14849600 |
| C           | -1.61700900 | 3.34553500  | -1.15292500 |
| C           | -1.97483000 | 1.90718100  | 1.38537100  |
| C           | -2.54900200 | -0.72679000 | -0.53746200 |
| C           | -2.67337900 | 0.78521300  | -2.46380700 |
| C           | -2.68182000 | 4.18015100  | -0.79126200 |
| C           | -0.82144300 | 3.68757400  | -2.25749000 |
| C           | -1.12290000 | 1.92350000  | 2.49684300  |
| C           | -3.36436900 | 1.94914100  | 1.57510600  |
| C           | -3.25994600 | -1.62613200 | -1.31061400 |
| C           | -2.15536500 | -1.12325100 | 0.84358200  |
| C           | -3.36474200 | -0.16509900 | -3.23431300 |
| H           | -2.44899900 | 1.74386400  | -2.91447300 |
| C           | -2.94954500 | 5.33543000  | -1.52762200 |

|   |             |             |             |
|---|-------------|-------------|-------------|
| H | -3.29349500 | 3.94674300  | 0.07178000  |
| C | -1.10256300 | 4.83231800  | -3.00163500 |
| H | 0.02377300  | 3.05857800  | -2.51973200 |
| C | -1.65420400 | 1.98727800  | 3.78495300  |
| H | -0.04959400 | 1.86305700  | 2.34092800  |
| C | -3.89063400 | 2.03381400  | 2.86268100  |
| H | -4.03258300 | 1.88034600  | 0.72292100  |
| C | -3.64301400 | -1.36958000 | -2.62541600 |
| O | -3.66539400 | -2.88421100 | -0.94981700 |
| C | -3.13109100 | -1.25219400 | 1.81395900  |
| C | -0.82279500 | -1.42946200 | 1.25038600  |
| H | -3.66407400 | 0.04102700  | -4.25531400 |
| C | -2.16714300 | 5.65984300  | -2.63666700 |
| H | -3.76953000 | 5.98247700  | -1.23004400 |
| H | -0.48169900 | 5.08389600  | -3.85629300 |
| C | -3.03693100 | 2.04762700  | 3.96894600  |
| H | -0.98928700 | 1.98404100  | 4.64329000  |
| H | -4.96686300 | 2.07652100  | 3.00284000  |
| O | -4.29728300 | -2.45474800 | -3.13920400 |
| C | -4.28926200 | -3.45510000 | -2.10800800 |
| C | -2.85256600 | -1.60393700 | 3.13251100  |
| O | -4.47504400 | -1.02407800 | 1.67016600  |
| C | -0.55857000 | -1.80307100 | 2.57102600  |
| P | 0.55430100  | -1.16809400 | 0.05970400  |
| H | -2.37880800 | 6.55869100  | -3.20837200 |
| H | -3.44993800 | 2.09663300  | 4.97212300  |
| H | -3.70553000 | -4.31570200 | -2.44657900 |
| H | -5.31827000 | -3.73567600 | -1.86550000 |
| C | -1.56970600 | -1.89053800 | 3.54481100  |
| O | -4.00864000 | -1.60447900 | 3.86702700  |
| C | -5.06504400 | -1.27033800 | 2.95441900  |
| H | 0.45793300  | -2.03390100 | 2.86470600  |
| C | 1.96814600  | -2.03950500 | 0.82426300  |
| C | 0.05964200  | -2.15880700 | -1.39312000 |
| H | -1.34880600 | -2.17142500 | 4.56813200  |
| H | -5.76224500 | -2.11134400 | 2.87864700  |
| H | -5.56826800 | -0.36391800 | 3.30154200  |
| C | 2.33154900  | -3.35205400 | 0.49953600  |
| C | 2.71130900  | -1.33871000 | 1.78771000  |
| C | 0.22248500  | -1.59815100 | -2.66675300 |
| C | -0.51164700 | -3.43353500 | -1.26530100 |
| C | 3.40984300  | -3.96157600 | 1.14354500  |
| H | 1.78399100  | -3.89833600 | -0.25977700 |
| C | 3.77605000  | -1.95588600 | 2.44121300  |



|            |             |             |             |
|------------|-------------|-------------|-------------|
| C          | -0.18597000 | -2.30211300 | -3.79977900 |
| H          | 0.65111100  | -0.60474200 | -2.76052400 |
| C          | -0.89967800 | -4.14295500 | -2.40071300 |
| H          | -0.67286900 | -3.85772400 | -0.27917300 |
| C          | 4.12784100  | -3.26907200 | 2.11948300  |
| H          | 3.68728600  | -4.97822200 | 0.88019100  |
| H          | 4.34195300  | -1.40512600 | 3.18667300  |
| C          | -0.74502600 | -3.57489000 | -3.66851900 |
| H          | -0.07142700 | -1.85552500 | -4.78288100 |
| H          | -1.32942300 | -5.13522400 | -2.29593900 |
| H          | 4.96550700  | -3.74600400 | 2.62021600  |
| H          | -1.06227400 | -4.12277800 | -4.55102800 |
| H          | 2.46244700  | -0.30633100 | 2.00958300  |
| Pd         | 0.96052500  | 1.20071700  | -0.32491400 |
| H          | 1.20734500  | 2.75427300  | -0.45330500 |
| Cl         | 3.33524800  | 0.94815800  | -0.65240300 |
| <b>TS2</b> |             |             |             |
| P          | -1.30497500 | 1.73975900  | -0.23034800 |
| C          | -2.33450000 | 0.50565300  | -1.11749800 |
| C          | -1.57452700 | 3.30397600  | -1.14487200 |
| C          | -2.15681200 | 1.92528700  | 1.37621100  |
| C          | -2.55827100 | -0.76942800 | -0.51446400 |
| C          | -2.79091700 | 0.76513400  | -2.41310700 |
| C          | -2.50117200 | 4.28107400  | -0.76087100 |
| C          | -0.77290300 | 3.52768700  | -2.27746800 |
| C          | -1.38500100 | 1.92303000  | 2.54563100  |
| C          | -3.55359800 | 2.01095700  | 1.47026400  |
| C          | -3.27252900 | -1.67724300 | -1.27392400 |
| C          | -2.13081600 | -1.15787900 | 0.86126600  |
| C          | -3.48180500 | -0.19529800 | -3.17324300 |
| H          | -2.60847500 | 1.73668900  | -2.85558300 |
| C          | -2.63021900 | 5.45742400  | -1.50267800 |
| H          | -3.11500900 | 4.13437400  | 0.12056000  |
| C          | -0.91673300 | 4.69411300  | -3.02623600 |
| H          | -0.03188900 | 2.78600000  | -2.56395100 |
| C          | -2.00112000 | 2.00370600  | 3.79433000  |
| H          | -0.30554000 | 1.82999800  | 2.46583200  |
| C          | -4.16589500 | 2.11287100  | 2.71858200  |
| H          | -4.16028200 | 1.97436800  | 0.57080900  |
| C          | -3.70615300 | -1.41425900 | -2.57165800 |
| O          | -3.64102300 | -2.94738200 | -0.91336200 |
| C          | -3.09497000 | -1.27583100 | 1.84566700  |
| C          | -0.79305600 | -1.46799500 | 1.25654900  |
| H          | -3.82321100 | 0.01531200  | -4.18017700 |
| C          | -1.84520000 | 5.66387500  | -2.63762000 |

|   |             |             |             |
|---|-------------|-------------|-------------|
| H | -3.34635300 | 6.21229000  | -1.19073000 |
| H | -0.29526700 | 4.85161400  | -3.90284200 |
| C | -3.39150800 | 2.10143500  | 3.88201400  |
| H | -1.39778400 | 1.98324900  | 4.69697900  |
| H | -5.24762400 | 2.18907700  | 2.78375700  |
| O | -4.35289300 | -2.51022100 | -3.07675300 |
| C | -4.29435300 | -3.51760300 | -2.05514500 |
| C | -2.80474800 | -1.61892200 | 3.16386100  |
| O | -4.44270500 | -1.06217800 | 1.71072000  |
| C | -0.51818600 | -1.83185600 | 2.57784800  |
| P | 0.58341700  | -1.18994900 | 0.06460600  |
| H | -1.94906000 | 6.57933800  | -3.21276200 |
| H | -3.87179500 | 2.16369200  | 4.85419500  |
| H | -3.70980600 | -4.36677300 | -2.42032900 |
| H | -5.31014700 | -3.81696200 | -1.78005300 |
| C | -1.51872700 | -1.90829900 | 3.56397100  |
| O | -3.95505900 | -1.62216400 | 3.90822200  |
| C | -5.01358300 | -1.24962600 | 3.01249600  |
| H | 0.50075800  | -2.06460300 | 2.86289600  |
| C | 2.00331300  | -2.11045300 | 0.77470500  |
| C | 0.06229600  | -2.14384200 | -1.40468300 |
| H | -1.28806700 | -2.18586300 | 4.58615200  |
| H | -5.75544500 | -2.05308800 | 2.97078600  |
| H | -5.45868800 | -0.30954600 | 3.35139900  |
| C | 2.37693200  | -3.39881500 | 0.37220600  |
| C | 2.76666300  | -1.45361400 | 1.75334400  |
| C | 0.20005800  | -1.55779000 | -2.66942600 |
| C | -0.50360800 | -3.42243200 | -1.29053100 |
| C | 3.48584700  | -4.02205700 | 0.94827300  |
| H | 1.81601000  | -3.91353100 | -0.39911900 |
| C | 3.86300300  | -2.08380000 | 2.33934400  |
| C | -0.23250100 | -2.24059100 | -3.80666700 |
| H | 0.64618000  | -0.57258600 | -2.75418100 |
| C | -0.91376700 | -4.11063800 | -2.43112000 |
| H | -0.64350100 | -3.86698700 | -0.31001300 |
| C | 4.22641600  | -3.37119900 | 1.93579200  |
| H | 3.77108600  | -5.01766200 | 0.62061000  |
| H | 4.44116100  | -1.56415500 | 3.09805300  |
| C | -0.78752300 | -3.51652500 | -3.68999600 |
| H | -0.13513500 | -1.77579500 | -4.78325700 |
| H | -1.33861700 | -5.10614300 | -2.33695500 |
| H | 5.08874800  | -3.85895600 | 2.38099600  |
| H | -1.12194800 | -4.04742500 | -4.57666100 |
| H | 2.50697900  | -0.43852700 | 2.03811300  |

|             |             |             |             |
|-------------|-------------|-------------|-------------|
| Pd          | 0.94336900  | 1.15623900  | -0.09586200 |
| C           | 1.94295800  | 3.02280700  | 0.01331700  |
| C           | 2.88865400  | 1.98041100  | 0.20578800  |
| H           | 2.95094600  | 1.03695600  | -1.01788100 |
| C           | 4.01625900  | 1.75367800  | 0.88903300  |
| H           | 4.60230900  | 2.56399800  | 1.32424200  |
| H           | 4.43527400  | 0.75368900  | 0.96900400  |
| Cl          | 3.35184800  | 0.41229100  | -2.36837600 |
| H           | 1.88569600  | 3.52383200  | -0.95194100 |
| H           | 1.60142700  | 3.61900400  | 0.85876400  |
| <b>INT2</b> |             |             |             |
| P           | -1.37456600 | 1.77107900  | -0.21248800 |
| C           | -2.36701700 | 0.51105200  | -1.10996800 |
| C           | -1.69959600 | 3.33627400  | -1.11381600 |
| C           | -2.27367000 | 1.93424600  | 1.37611200  |
| C           | -2.54803900 | -0.77158000 | -0.50767400 |
| C           | -2.84076800 | 0.75793100  | -2.40135600 |
| C           | -2.65193000 | 4.28267900  | -0.71248100 |
| C           | -0.90714200 | 3.60408300  | -2.24303900 |
| C           | -1.52666400 | 1.98730900  | 2.56053500  |
| C           | -3.67421900 | 1.96102700  | 1.44527900  |
| C           | -3.25140700 | -1.69555500 | -1.25823100 |
| C           | -2.10734200 | -1.14428500 | 0.86896600  |
| C           | -3.51341100 | -0.22071800 | -3.15586200 |
| H           | -2.69006000 | 1.73553900  | -2.84327100 |
| C           | -2.81608500 | 5.46750500  | -1.43282300 |
| H           | -3.25994100 | 4.10466700  | 0.16697000  |
| C           | -1.08469200 | 4.78045700  | -2.96978900 |
| H           | -0.14750300 | 2.89353400  | -2.55289200 |
| C           | -2.16857200 | 2.06215200  | 3.79679100  |
| H           | -0.44230000 | 1.94600500  | 2.50493600  |
| C           | -4.31445800 | 2.05811500  | 2.68007000  |
| H           | -4.26132400 | 1.88631000  | 0.53521600  |
| C           | -3.70475300 | -1.44357000 | -2.55101800 |
| O           | -3.59272300 | -2.97191600 | -0.89055500 |
| C           | -3.07591300 | -1.28825700 | 1.84626800  |
| C           | -0.76385400 | -1.41673700 | 1.27705100  |
| H           | -3.86938000 | -0.01899500 | -4.15968400 |
| C           | -2.03887300 | 5.71716800  | -2.56473900 |
| H           | -3.55350600 | 6.19551600  | -1.10646200 |
| H           | -0.46804300 | 4.96944100  | -3.84375900 |
| C           | -3.56320700 | 2.09992300  | 3.85791800  |
| H           | -1.58171500 | 2.08536900  | 4.71030800  |
| H           | -5.39959200 | 2.09000800  | 2.72365200  |
| O           | -4.33362200 | -2.55518200 | -3.04840100 |

|    |             |             |             |
|----|-------------|-------------|-------------|
| C  | -4.25065100 | -3.55561300 | -2.02224900 |
| C  | -2.78998600 | -1.61514000 | 3.16900400  |
| O  | -4.42888800 | -1.11999700 | 1.69603000  |
| C  | -0.49366600 | -1.76350500 | 2.60430000  |
| P  | 0.62125200  | -1.15586200 | 0.08074500  |
| H  | -2.16948600 | 6.63941800  | -3.12356000 |
| H  | -4.06415000 | 2.15856000  | 4.81991500  |
| H  | -3.65935900 | -4.39949000 | -2.38929500 |
| H  | -5.25944100 | -3.86713900 | -1.73417400 |
| C  | -1.49962000 | -1.86160100 | 3.58271200  |
| O  | -3.94739800 | -1.65231200 | 3.90144900  |
| C  | -5.00687500 | -1.31424900 | 2.99304100  |
| H  | 0.52631600  | -1.97375400 | 2.90121200  |
| C  | 2.01948900  | -2.11164500 | 0.79914100  |
| C  | 0.06780300  | -2.14870400 | -1.35704400 |
| H  | -1.26936400 | -2.12673800 | 4.60830200  |
| H  | -5.72635200 | -2.13773800 | 2.94975600  |
| H  | -5.47978200 | -0.38424300 | 3.32166200  |
| C  | 2.42622900  | -3.37332000 | 0.34462300  |
| C  | 2.74163100  | -1.50147700 | 1.83871800  |
| C  | 0.12311400  | -1.59170800 | -2.63994300 |
| C  | -0.44907100 | -3.44318500 | -1.19044700 |
| C  | 3.51672500  | -4.01816900 | 0.93245500  |
| H  | 1.90287100  | -3.85362200 | -0.47353100 |
| C  | 3.81726100  | -2.15502500 | 2.43761600  |
| C  | -0.33410200 | -2.31645700 | -3.74135300 |
| H  | 0.50649500  | -0.58751700 | -2.77613800 |
| C  | -0.88257400 | -4.17422500 | -2.29470200 |
| H  | -0.52982000 | -3.86911000 | -0.19522700 |
| C  | 4.20830300  | -3.41754200 | 1.98499100  |
| H  | 3.82389900  | -4.99303400 | 0.56439300  |
| H  | 4.35990500  | -1.67012300 | 3.24399200  |
| C  | -0.83324800 | -3.60888800 | -3.57215700 |
| H  | -0.30241600 | -1.86825000 | -4.72992400 |
| H  | -1.26920600 | -5.18016500 | -2.15680900 |
| H  | 5.05440000  | -3.92304200 | 2.44148000  |
| H  | -1.18680100 | -4.17309600 | -4.43036100 |
| H  | 2.46891500  | -0.50066900 | 2.15937400  |
| Pd | 0.94424500  | 1.20418700  | 0.05395800  |
| C  | 2.05927400  | 3.01455800  | 0.42464600  |
| C  | 2.88942400  | 1.89766900  | 0.45672200  |
| H  | 1.72595200  | 1.30994100  | -1.76388100 |
| C  | 4.09380600  | 1.36531700  | 0.58971700  |
| H  | 4.96874900  | 1.98627400  | 0.78933600  |

|             |             |             |             |
|-------------|-------------|-------------|-------------|
| H           | 4.26534100  | 0.29595900  | 0.50968800  |
| Cl          | 2.14390800  | 1.50360600  | -3.05923900 |
| H           | 2.01930300  | 3.65232700  | -0.45728700 |
| H           | 1.71235200  | 3.47649600  | 1.34841000  |
| <b>INT3</b> |             |             |             |
| P           | -1.30406900 | 2.04842000  | -0.18774300 |
| C           | -2.33515200 | 0.83598800  | -1.12787500 |
| C           | -1.73939300 | 3.68906700  | -0.89907000 |
| C           | -2.06050000 | 2.03924400  | 1.48150300  |
| C           | -2.44727600 | -0.51745300 | -0.66593200 |
| C           | -2.85500900 | 1.19626400  | -2.37405900 |
| C           | -2.66270300 | 4.57684200  | -0.32922000 |
| C           | -1.04853600 | 4.08040500  | -2.05923100 |
| C           | -1.22146100 | 1.93231100  | 2.59830400  |
| C           | -3.44930900 | 2.09468800  | 1.67028200  |
| C           | -3.11802400 | -1.38334600 | -1.51010500 |
| C           | -2.05290100 | -1.02378300 | 0.68719600  |
| C           | -3.50511000 | 0.27949800  | -3.22054400 |
| H           | -2.74848400 | 2.21811300  | -2.71650300 |
| C           | -2.90348500 | 5.81995000  | -0.91768800 |
| H           | -3.18782800 | 4.30960900  | 0.58007100  |
| C           | -1.30484900 | 5.31446000  | -2.65486000 |
| H           | -0.31342300 | 3.41305300  | -2.49884700 |
| C           | -1.75979500 | 1.88144400  | 3.88426600  |
| H           | -0.14695800 | 1.86540700  | 2.44962800  |
| C           | -3.98513700 | 2.07183600  | 2.95734100  |
| H           | -4.10961400 | 2.13250600  | 0.80966900  |
| C           | -3.61697300 | -1.01250100 | -2.75905100 |
| O           | -3.43995900 | -2.69623200 | -1.26405200 |
| C           | -3.05465800 | -1.14398400 | 1.63340600  |
| C           | -0.75515500 | -1.46289300 | 1.10042600  |
| H           | -3.90187000 | 0.57928500  | -4.18368800 |
| C           | -2.23294200 | 6.18918000  | -2.08449700 |
| H           | -3.61780000 | 6.49940400  | -0.46102400 |
| H           | -0.77041100 | 5.59613100  | -3.55759400 |
| C           | -3.14222400 | 1.95570900  | 4.06564400  |
| H           | -1.10194300 | 1.77967300  | 4.74235700  |
| H           | -5.06114700 | 2.13275900  | 3.09465700  |
| O           | -4.23980100 | -2.08300600 | -3.34720400 |
| C           | -3.96714200 | -3.20570200 | -2.49515600 |
| C           | -2.83536400 | -1.57879800 | 2.93877300  |
| O           | -4.38197600 | -0.83512400 | 1.47042800  |
| C           | -0.55113300 | -1.90915300 | 2.41092400  |
| P           | 0.67595300  | -1.34423400 | -0.06320300 |
| H           | -2.42476300 | 7.15573800  | -2.54157100 |

|            |             |             |             |
|------------|-------------|-------------|-------------|
| H          | -3.56268600 | 1.91722900  | 5.06628800  |
| H          | -3.21832600 | -3.85007800 | -2.96977600 |
| H          | -4.89631200 | -3.74323800 | -2.29472600 |
| C          | -1.58414600 | -1.96415400 | 3.36432300  |
| O          | -4.00855800 | -1.54343500 | 3.64562400  |
| C          | -5.02592600 | -1.16221200 | 2.70756900  |
| H          | 0.43829800  | -2.23048500 | 2.71198700  |
| C          | 2.03672000  | -2.18021700 | 0.85010200  |
| C          | 0.23795700  | -2.54188100 | -1.37817600 |
| H          | -1.40452200 | -2.30385100 | 4.37797400  |
| H          | -5.71100400 | -2.00311700 | 2.54958500  |
| H          | -5.55195100 | -0.28300700 | 3.08614200  |
| C          | 2.24314600  | -3.56668000 | 0.85026300  |
| C          | 2.90840800  | -1.36125200 | 1.58427700  |
| C          | 0.72043700  | -2.32393700 | -2.67556400 |
| C          | -0.52769300 | -3.68644400 | -1.11143400 |
| C          | 3.29694100  | -4.12134300 | 1.57801200  |
| H          | 1.58632500  | -4.21285200 | 0.27802600  |
| C          | 3.95252200  | -1.91697600 | 2.32300600  |
| C          | 0.44563500  | -3.23952300 | -3.69191800 |
| H          | 1.29587700  | -1.43063100 | -2.89258200 |
| C          | -0.78911900 | -4.60760800 | -2.12572100 |
| H          | -0.92658000 | -3.84910400 | -0.11578400 |
| C          | 4.14973700  | -3.29989900 | 2.31868800  |
| H          | 3.45172000  | -5.19658300 | 1.56610800  |
| H          | 4.61731800  | -1.27181600 | 2.89023400  |
| C          | -0.30570600 | -4.38433500 | -3.41794600 |
| H          | 0.81544200  | -3.05567700 | -4.69631700 |
| H          | -1.37552500 | -5.49615300 | -1.90830600 |
| H          | 4.96916600  | -3.73474900 | 2.88379100  |
| H          | -0.51735400 | -5.09896600 | -4.20834000 |
| H          | 2.76200700  | -0.28337200 | 1.56724800  |
| Pd         | 0.73156800  | 0.95235500  | -0.34047600 |
| H          | 0.69206700  | 0.97560300  | -2.14601300 |
| Cl         | 0.89351100  | 1.20757300  | -3.55271300 |
| <b>TS3</b> |             |             |             |
| P          | -1.30032200 | 1.92619100  | -0.22107800 |
| C          | -2.26982500 | 0.62123000  | -1.10397800 |
| C          | -1.72339600 | 3.48369500  | -1.10067700 |
| C          | -2.15558700 | 2.03858500  | 1.39562300  |
| C          | -2.40970900 | -0.68105000 | -0.52509800 |
| C          | -2.77567300 | 0.87423200  | -2.38323600 |
| C          | -2.61913800 | 4.44180800  | -0.60691700 |
| C          | -1.05201700 | 3.74124400  | -2.30848700 |
| C          | -1.38480900 | 2.03249500  | 2.56537200  |

|   |             |             |             |
|---|-------------|-------------|-------------|
| C | -3.55366800 | 2.08580700  | 1.49401600  |
| C | -3.10195800 | -1.60486100 | -1.28749500 |
| C | -1.98959700 | -1.10191700 | 0.84813600  |
| C | -3.43221300 | -0.10557800 | -3.14991000 |
| H | -2.66596300 | 1.86317400  | -2.80985800 |
| C | -2.85063500 | 5.62296600  | -1.31501300 |
| H | -3.13151100 | 4.27529100  | 0.33334800  |
| C | -1.29756300 | 4.91252900  | -3.02206600 |
| H | -0.32996200 | 3.02426500  | -2.68631600 |
| C | -2.00033200 | 2.06990700  | 3.81651300  |
| H | -0.30276500 | 1.97419800  | 2.48216200  |
| C | -4.16738700 | 2.15012100  | 2.74442100  |
| H | -4.15993700 | 2.05694400  | 0.59402900  |
| C | -3.58034700 | -1.34513600 | -2.56921600 |
| O | -3.41772100 | -2.89262400 | -0.93244200 |
| C | -2.97690900 | -1.20335100 | 1.81217700  |
| C | -0.68012800 | -1.51067900 | 1.25697500  |
| H | -3.81188200 | 0.11045500  | -4.14203100 |
| C | -2.19829200 | 5.85851400  | -2.52574000 |
| H | -3.54387500 | 6.35877700  | -0.91712000 |
| H | -0.77377700 | 5.09250100  | -3.95630100 |
| C | -3.39259400 | 2.13218800  | 3.90719900  |
| H | -1.39542900 | 2.04776100  | 4.71817300  |
| H | -5.25058700 | 2.20136800  | 2.81122700  |
| O | -4.19103100 | -2.46259500 | -3.07587400 |
| C | -4.12829600 | -3.45573900 | -2.04172500 |
| C | -2.73547200 | -1.59765000 | 3.12576700  |
| O | -4.31247300 | -0.93191900 | 1.65250200  |
| C | -0.45492000 | -1.92254100 | 2.57513300  |
| P | 0.75314600  | -1.33366900 | 0.10322800  |
| H | -2.38127700 | 6.77772400  | -3.07468200 |
| H | -3.87336300 | 2.16378800  | 4.88069400  |
| H | -3.58618000 | -4.32871200 | -2.41437400 |
| H | -5.14353900 | -3.71919400 | -1.72605700 |
| C | -1.47540300 | -1.96526900 | 3.54247100  |
| O | -3.90196200 | -1.56608400 | 3.84497000  |
| C | -4.93084700 | -1.18269000 | 2.92033800  |
| H | 0.54265600  | -2.22385400 | 2.87144200  |
| C | 2.07669500  | -2.34647400 | 0.88005000  |
| C | 0.21693200  | -2.26423500 | -1.37965100 |
| H | -1.28014600 | -2.28344500 | 4.56025100  |
| H | -5.65173800 | -2.00090900 | 2.81644500  |
| H | -5.41165800 | -0.26780600 | 3.27625700  |
| C | 2.28942800  | -3.71123400 | 0.64205400  |

|            |             |             |             |
|------------|-------------|-------------|-------------|
| C          | 2.93726900  | -1.66838600 | 1.75925100  |
| C          | 0.40982000  | -1.67046400 | -2.63457900 |
| C          | -0.40999500 | -3.51628300 | -1.30137700 |
| C          | 3.33051400  | -4.38474500 | 1.28299200  |
| H          | 1.65386100  | -4.24927000 | -0.05150800 |
| C          | 3.96523800  | -2.34593900 | 2.41378500  |
| C          | -0.01424200 | -2.31866200 | -3.79453200 |
| H          | 0.87111400  | -0.68818000 | -2.68947100 |
| C          | -0.80894700 | -4.17541600 | -2.46372500 |
| H          | -0.61241100 | -3.96081000 | -0.33217400 |
| C          | 4.16454000  | -3.70772700 | 2.17497200  |
| H          | 3.48898500  | -5.44107100 | 1.08465900  |
| H          | 4.61766600  | -1.80906300 | 3.09635800  |
| C          | -0.61969100 | -3.57441200 | -3.71082700 |
| H          | 0.12450200  | -1.84316600 | -4.76099900 |
| H          | -1.27859500 | -5.15272000 | -2.39503400 |
| H          | 4.97240600  | -4.23585000 | 2.67323000  |
| H          | -0.94803700 | -4.08147500 | -4.61350900 |
| H          | 2.79514200  | -0.60244200 | 1.92284800  |
| Pd         | 0.77176700  | 1.01086100  | -0.10023700 |
| H          | 1.46504200  | 2.24857300  | -1.25481900 |
| Cl         | 2.51007500  | 2.83006400  | -2.01232200 |
| <b>TS4</b> |             |             |             |
| P          | -1.30253700 | 1.69380400  | -0.27001100 |
| C          | -2.35413000 | 0.46574000  | -1.14377100 |
| C          | -1.59402500 | 3.27070400  | -1.15797900 |
| C          | -2.11090000 | 1.87057700  | 1.35895800  |
| C          | -2.59276900 | -0.80271900 | -0.53160100 |
| C          | -2.79990600 | 0.71441100  | -2.44545500 |
| C          | -2.43509000 | 4.28475700  | -0.68352800 |
| C          | -0.89006700 | 3.47462000  | -2.35762900 |
| C          | -1.31276500 | 1.81720500  | 2.50894200  |
| C          | -3.50175000 | 2.00007300  | 1.48698200  |
| C          | -3.29800700 | -1.71651700 | -1.29286900 |
| C          | -2.20587300 | -1.18286000 | 0.85852200  |
| C          | -3.48804900 | -0.24949500 | -3.20407200 |
| H          | -2.61408300 | 1.68178800  | -2.89509800 |
| C          | -2.57837900 | 5.47413600  | -1.40200600 |
| H          | -2.97153500 | 4.15681700  | 0.24944200  |
| C          | -1.04898200 | 4.65385800  | -3.08225700 |
| H          | -0.21029800 | 2.70585800  | -2.71498700 |
| C          | -1.89675300 | 1.89035500  | 3.77339100  |
| H          | -0.23907600 | 1.68989600  | 2.40175800  |
| C          | -4.08113400 | 2.09413500  | 2.75134600  |
| H          | -4.12924100 | 2.00393900  | 0.60116800  |



|   |             |             |             |
|---|-------------|-------------|-------------|
| C | -3.71831100 | -1.46456600 | -2.59707100 |
| O | -3.67485500 | -2.98160200 | -0.92385900 |
| C | -3.19990900 | -1.27430800 | 1.81531500  |
| C | -0.88811300 | -1.52265400 | 1.29217200  |
| H | -3.82311300 | -0.04348400 | -4.21411200 |
| C | -1.89377900 | 5.65921500  | -2.60326100 |
| H | -3.22772300 | 6.25604200  | -1.01890800 |
| H | -0.50330900 | 4.79417100  | -4.01069200 |
| C | -3.28066200 | 2.03184300  | 3.89552200  |
| H | -1.27403900 | 1.83046300  | 4.66084000  |
| H | -5.15771500 | 2.20582000  | 2.84423800  |
| O | -4.36341900 | -2.56291500 | -3.09827100 |
| C | -4.30211600 | -3.56682300 | -2.07282400 |
| C | -2.95647300 | -1.62424000 | 3.14130500  |
| O | -4.53593600 | -1.02202300 | 1.64251300  |
| C | -0.66135200 | -1.89899400 | 2.61903000  |
| P | 0.51826800  | -1.29332100 | 0.12553400  |
| H | -2.00847600 | 6.58483500  | -3.15952400 |
| H | -3.73618400 | 2.08811700  | 4.87978400  |
| H | -3.69675900 | -4.40643200 | -2.42679300 |
| H | -5.31607800 | -3.88266500 | -1.81150900 |
| C | -1.69106500 | -1.95105400 | 3.57607600  |
| O | -4.12553600 | -1.59235600 | 3.85310000  |
| C | -5.15264800 | -1.21605100 | 2.92276300  |
| H | 0.33974100  | -2.16570300 | 2.93367000  |
| C | 1.91334100  | -2.20971800 | 0.88599200  |
| C | 0.01291700  | -2.27446600 | -1.33189800 |
| H | -1.49646000 | -2.23767900 | 4.60314100  |
| H | -5.89221500 | -2.01984600 | 2.85122800  |
| H | -5.61001700 | -0.27829900 | 3.25029200  |
| C | 2.39750200  | -3.42689600 | 0.39063800  |
| C | 2.57395300  | -1.60509700 | 1.96956600  |
| C | 0.11079800  | -1.68918200 | -2.60063500 |
| C | -0.51224400 | -3.56895500 | -1.20584400 |
| C | 3.51428700  | -4.03013100 | 0.97446100  |
| H | 1.91551200  | -3.90161300 | -0.45606300 |
| C | 3.67825900  | -2.21483200 | 2.55925100  |
| C | -0.31652200 | -2.38592700 | -3.73089200 |
| H | 0.49749500  | -0.67787900 | -2.68866600 |
| C | -0.91793500 | -4.27219800 | -2.33897900 |
| H | -0.61748100 | -4.01649600 | -0.22234500 |
| C | 4.15332500  | -3.43071600 | 2.05962300  |
| H | 3.88470900  | -4.96981500 | 0.57494600  |
| H | 4.17884700  | -1.73226700 | 3.39308100  |

|             |             |             |             |
|-------------|-------------|-------------|-------------|
| C           | -0.82834500 | -3.67872800 | -3.60153600 |
| H           | -0.25510100 | -1.91915900 | -4.70934600 |
| H           | -1.31156700 | -5.27951200 | -2.23654800 |
| H           | 5.02390200  | -3.90000300 | 2.50790100  |
| H           | -1.16003700 | -4.22230900 | -4.48134700 |
| H           | 2.22676800  | -0.64601400 | 2.34280500  |
| Pd          | 0.93252500  | 1.00782700  | -0.25443300 |
| Cl          | 5.78649300  | 1.84280600  | 0.68090400  |
| C           | 2.94103400  | 1.84117400  | -0.77792300 |
| C           | 2.01015600  | 2.86805200  | -0.48412700 |
| C           | 3.52984000  | 1.04306200  | 0.22278500  |
| H           | 3.19239700  | 1.62643100  | -1.81379800 |
| H           | 1.99720900  | 3.30684800  | 0.51260500  |
| H           | 1.65450000  | 3.51590400  | -1.27903000 |
| H           | 3.96446000  | 0.08627800  | -0.02481300 |
| H           | 3.29687200  | 1.21551500  | 1.26449000  |
| <b>INT4</b> |             |             |             |
| P           | -1.31312900 | 1.72389900  | -0.25501800 |
| C           | -2.36920100 | 0.49757700  | -1.13800800 |
| C           | -1.65050900 | 3.30795700  | -1.12543700 |
| C           | -2.14916200 | 1.87856300  | 1.36806200  |
| C           | -2.59039400 | -0.78182500 | -0.54122200 |
| C           | -2.82799700 | 0.75525500  | -2.43345800 |
| C           | -2.52344200 | 4.29724900  | -0.65497900 |
| C           | -0.93392200 | 3.54550500  | -2.31153500 |
| C           | -1.35991600 | 1.82540400  | 2.52420900  |
| C           | -3.54192500 | 1.99013500  | 1.49051500  |
| C           | -3.29666400 | -1.69181500 | -1.30673200 |
| C           | -2.19376200 | -1.17627200 | 0.84301400  |
| C           | -3.51281100 | -0.20629200 | -3.19894600 |
| H           | -2.65444200 | 1.72979100  | -2.87298400 |
| C           | -2.68515400 | 5.49131700  | -1.36178700 |
| H           | -3.07162800 | 4.14592100  | 0.26769600  |
| C           | -1.11159600 | 4.72799200  | -3.02686400 |
| H           | -0.23027800 | 2.79686600  | -2.66489300 |
| C           | -1.95208500 | 1.88319200  | 3.78590100  |
| H           | -0.28439500 | 1.70899700  | 2.42138900  |
| C           | -4.13126400 | 2.06958400  | 2.75153200  |
| H           | -4.16380100 | 1.99203400  | 0.60065400  |
| C           | -3.72973300 | -1.42946800 | -2.60387600 |
| O           | -3.66635000 | -2.96310100 | -0.94626900 |
| C           | -3.18591700 | -1.28401600 | 1.80058900  |
| C           | -0.87298400 | -1.51607000 | 1.26950900  |
| H           | -3.85757900 | 0.00856400  | -4.20405000 |
| C           | -1.98780700 | 5.70734400  | -2.55070300 |

|   |             |             |             |
|---|-------------|-------------|-------------|
| H | -3.35982500 | 6.25257100  | -0.98015200 |
| H | -0.55604400 | 4.89150900  | -3.94588100 |
| C | -3.33808700 | 2.00910400  | 3.90086800  |
| H | -1.33433400 | 1.82305500  | 4.67707900  |
| H | -5.20987800 | 2.16792300  | 2.83791000  |
| O | -4.37449100 | -2.52777700 | -3.11133100 |
| C | -4.29986200 | -3.53941600 | -2.09528700 |
| C | -2.94009100 | -1.64475300 | 3.12250400  |
| O | -4.52543400 | -1.04135600 | 1.63066800  |
| C | -0.64460700 | -1.90204400 | 2.59373600  |
| P | 0.53251300  | -1.27415500 | 0.09654800  |
| H | -2.11735600 | 6.63612300  | -3.09873800 |
| H | -3.80060100 | 2.05386600  | 4.88263200  |
| H | -3.69425000 | -4.37381900 | -2.46165000 |
| H | -5.31038700 | -3.86276500 | -1.82840500 |
| C | -1.67213000 | -1.96687300 | 3.55266100  |
| O | -4.11028300 | -1.62880000 | 3.83600200  |
| C | -5.13839800 | -1.24533700 | 2.91007700  |
| H | 0.35799400  | -2.16701000 | 2.90531900  |
| C | 1.91343700  | -2.21217700 | 0.86737900  |
| C | 0.01510600  | -2.28514100 | -1.34193800 |
| H | -1.47428400 | -2.26105300 | 4.57713700  |
| H | -5.87846600 | -2.04854100 | 2.83392400  |
| H | -5.59573500 | -0.31028200 | 3.24605900  |
| C | 2.36774900  | -3.45675700 | 0.41305400  |
| C | 2.59301800  | -1.59132300 | 1.93023500  |
| C | 0.11528200  | -1.72053700 | -2.61999700 |
| C | -0.52217500 | -3.57272800 | -1.19858800 |
| C | 3.46816000  | -4.07115600 | 1.01632900  |
| H | 1.87230600  | -3.94643100 | -0.41730800 |
| C | 3.67828900  | -2.21319800 | 2.54391600  |
| C | -0.31915300 | -2.42944000 | -3.74012800 |
| H | 0.51037600  | -0.71338600 | -2.72049600 |
| C | -0.93458000 | -4.28977700 | -2.32085800 |
| H | -0.63356000 | -4.00394200 | -0.20839900 |
| C | 4.12117000  | -3.45714800 | 2.08518400  |
| H | 3.81296800  | -5.03311600 | 0.64754100  |
| H | 4.18748300  | -1.72090600 | 3.36738600  |
| C | -0.84141900 | -3.71611600 | -3.59220600 |
| H | -0.25553300 | -1.97689100 | -4.72529900 |
| H | -1.33819900 | -5.29160500 | -2.20290200 |
| H | 4.97563900  | -3.93773800 | 2.55256100  |
| H | -1.17893200 | -4.26960600 | -4.46376800 |
| H | 2.26998700  | -0.61037400 | 2.26839900  |

|             |             |             |             |
|-------------|-------------|-------------|-------------|
| Pd          | 0.93371200  | 1.02030900  | -0.30351400 |
| Cl          | 5.63642700  | 1.95471200  | 0.33147200  |
| C           | 3.05047400  | 1.60929900  | -0.71417900 |
| C           | 2.22747100  | 2.74986500  | -0.67666700 |
| C           | 3.89387200  | 1.20023300  | 0.42983400  |
| H           | 3.33365700  | 1.19204800  | -1.67869900 |
| H           | 2.21457400  | 3.38178000  | 0.21005200  |
| H           | 1.91791500  | 3.23914400  | -1.59595600 |
| H           | 4.09384500  | 0.13250000  | 0.47226200  |
| H           | 3.51722200  | 1.55564300  | 1.38825400  |
| <b>INT5</b> |             |             |             |
| P           | -1.07997400 | 1.99635900  | 0.00178300  |
| C           | -2.06959600 | 0.80171300  | -1.00661200 |
| C           | -1.46417000 | 3.62940700  | -0.76262000 |
| C           | -1.98562200 | 1.99981700  | 1.59784700  |
| C           | -2.31240400 | -0.51842600 | -0.51040700 |
| C           | -2.44001500 | 1.13176800  | -2.31479500 |
| C           | -2.40930000 | 4.54459600  | -0.28062200 |
| C           | -0.68787300 | 3.98637300  | -1.87944900 |
| C           | -1.24192300 | 1.86016500  | 2.77700000  |
| C           | -3.38387500 | 2.07867000  | 1.67595300  |
| C           | -2.94268300 | -1.38597600 | -1.38505300 |
| C           | -2.01495400 | -1.01664900 | 0.86697900  |
| C           | -3.04973600 | 0.21327000  | -3.18881000 |
| H           | -2.25214100 | 2.13372500  | -2.68113100 |
| C           | -2.58532100 | 5.77883500  | -0.91097300 |
| H           | -3.00263600 | 4.30506000  | 0.59405900  |
| C           | -0.88027900 | 5.20772200  | -2.52216400 |
| H           | 0.07532800  | 3.29844900  | -2.23301000 |
| C           | -1.88264300 | 1.80135100  | 4.01481700  |
| H           | -0.16140700 | 1.76644300  | 2.70816000  |
| C           | -4.02264000 | 2.04508800  | 2.91492800  |
| H           | -3.97291300 | 2.13989400  | 0.76617900  |
| C           | -3.28573700 | -1.04913300 | -2.69117700 |
| O           | -3.31748700 | -2.68268400 | -1.13130700 |
| C           | -3.06598800 | -1.18971600 | 1.74864700  |
| C           | -0.72907300 | -1.41640600 | 1.34455200  |
| H           | -3.32468900 | 0.48925500  | -4.20056300 |
| C           | -1.83044800 | 6.11068100  | -2.03667200 |
| H           | -3.31697500 | 6.48066200  | -0.51998200 |
| H           | -0.27913000 | 5.46122200  | -3.39103700 |
| C           | -3.27385500 | 1.89868000  | 4.08575100  |
| H           | -1.29836700 | 1.67264200  | 4.92134200  |
| H           | -5.10544300 | 2.12018100  | 2.96617500  |
| O           | -3.87550100 | -2.12158600 | -3.31135100 |

|    |             |             |             |
|----|-------------|-------------|-------------|
| C  | -3.85294500 | -3.19423500 | -2.35791400 |
| C  | -2.90492300 | -1.65781500 | 3.05020100  |
| O  | -4.39140000 | -0.91802900 | 1.51766500  |
| C  | -0.58348700 | -1.90615600 | 2.64642300  |
| P  | 0.73784000  | -1.09789800 | 0.28386500  |
| H  | -1.97268200 | 7.06977300  | -2.52650400 |
| H  | -3.77441200 | 1.85322400  | 5.04871900  |
| H  | -3.20506900 | -3.99401400 | -2.73003800 |
| H  | -4.87308500 | -3.55111600 | -2.18703400 |
| C  | -1.66915300 | -2.02820500 | 3.53296000  |
| O  | -4.11771600 | -1.68167700 | 3.69089400  |
| C  | -5.08578200 | -1.23491100 | 2.73010700  |
| H  | 0.39902100  | -2.20309500 | 2.99353900  |
| C  | 2.09554100  | -2.01420800 | 1.11882300  |
| C  | 0.37293100  | -2.07834800 | -1.22337500 |
| H  | -1.53992000 | -2.40155800 | 4.54260400  |
| H  | -5.80558900 | -2.03761800 | 2.53687000  |
| H  | -5.58199700 | -0.33715800 | 3.10934500  |
| C  | 2.52149400  | -3.30116700 | 0.76403300  |
| C  | 2.78705000  | -1.32930800 | 2.13407500  |
| C  | 0.66742700  | -1.50191400 | -2.46736000 |
| C  | -0.21693100 | -3.34973100 | -1.17838800 |
| C  | 3.60587400  | -3.89298100 | 1.41609900  |
| H  | 2.01319100  | -3.84192900 | -0.02647100 |
| C  | 3.85636900  | -1.92782600 | 2.79804500  |
| C  | 0.37797600  | -2.18610400 | -3.64827900 |
| H  | 1.10079600  | -0.50542200 | -2.50025100 |
| C  | -0.48861400 | -4.04071500 | -2.35908300 |
| H  | -0.48103800 | -3.78752400 | -0.22059200 |
| C  | 4.27157100  | -3.21297100 | 2.43700200  |
| H  | 3.92801100  | -4.88925500 | 1.12576600  |
| H  | 4.37371700  | -1.38807600 | 3.58628200  |
| C  | -0.19830300 | -3.45724000 | -3.59576400 |
| H  | 0.59672300  | -1.72516900 | -4.60715000 |
| H  | -0.93450200 | -5.03072100 | -2.31485900 |
| H  | 5.11349500  | -3.67638300 | 2.94323800  |
| H  | -0.42445200 | -3.99096300 | -4.51451200 |
| H  | 2.47987700  | -0.31900800 | 2.39403500  |
| Pd | 1.11070700  | 1.17208800  | -0.09103200 |
| C  | 2.84991200  | 2.64353600  | -2.17943100 |
| N  | 3.67860800  | 0.71839400  | -1.77885400 |
| H  | 3.79758000  | -0.25923600 | -2.00038300 |
| H  | 2.53384900  | 3.49598400  | -2.76701000 |
| C  | 2.87642900  | 2.52878900  | -0.74906800 |

|                                     |             |             |             |
|-------------------------------------|-------------|-------------|-------------|
| H                                   | 2.83028300  | 3.34090700  | -0.03774400 |
| C                                   | 3.36375000  | 1.21634200  | -0.52372200 |
| H                                   | 3.81937800  | 0.78319900  | 0.35692100  |
| N                                   | 3.28105700  | 1.55035300  | -2.78472600 |
| <b>C<sub>3</sub>H<sub>5</sub>Cl</b> |             |             |             |
| Cl                                  | 5.67704500  | 1.75734800  | 0.31480400  |
| C                                   | 3.10328100  | 1.84698400  | -0.65633300 |
| C                                   | 2.14323100  | 2.76406100  | -0.52767800 |
| C                                   | 3.89492400  | 1.32949800  | 0.49548700  |
| H                                   | 3.34036300  | 1.42512300  | -1.63105400 |
| H                                   | 1.89877600  | 3.20250600  | 0.43731600  |
| H                                   | 1.56390900  | 3.10454400  | -1.38098000 |
| H                                   | 3.87680100  | 0.23998900  | 0.55973900  |
| H                                   | 3.57415900  | 1.76046900  | 1.44439700  |
| <b>TS5</b>                          |             |             |             |
| P                                   | -1.04872600 | 1.75580900  | -0.02364900 |
| C                                   | -2.08322900 | 0.61151500  | -1.02726200 |
| C                                   | -1.29426600 | 3.40625300  | -0.78824800 |
| C                                   | -1.93117000 | 1.82360100  | 1.57972500  |
| C                                   | -2.35567100 | -0.70067700 | -0.52986300 |
| C                                   | -2.46427100 | 0.96605200  | -2.32481700 |
| C                                   | -2.26539500 | 4.33153700  | -0.38011400 |
| C                                   | -0.40612300 | 3.75656900  | -1.81932800 |
| C                                   | -1.17415800 | 1.72355400  | 2.75444600  |
| C                                   | -3.32752000 | 1.92574200  | 1.66897400  |
| C                                   | -3.04366800 | -1.53969500 | -1.38746400 |
| C                                   | -2.02907800 | -1.18147800 | 0.84528200  |
| C                                   | -3.12985900 | 0.07387600  | -3.18530200 |
| H                                   | -2.23998100 | 1.96206000  | -2.68848400 |
| C                                   | -2.35515700 | 5.57775400  | -1.00179600 |
| H                                   | -2.94237000 | 4.09085900  | 0.43137100  |
| C                                   | -0.50564800 | 4.99924000  | -2.44440700 |
| H                                   | 0.37648000  | 3.06832700  | -2.12359300 |
| C                                   | -1.80155600 | 1.72847700  | 4.00069200  |
| H                                   | -0.09548900 | 1.61383200  | 2.68229400  |
| C                                   | -3.95157900 | 1.95160200  | 2.91535200  |
| H                                   | -3.92594300 | 1.95644800  | 0.76385800  |
| C                                   | -3.40668600 | -1.17899500 | -2.68314000 |
| O                                   | -3.46625700 | -2.81951200 | -1.13031200 |
| C                                   | -3.06003000 | -1.32008700 | 1.75675800  |
| C                                   | -0.73066600 | -1.54553800 | 1.31636500  |
| H                                   | -3.41758200 | 0.36202000  | -4.18995200 |
| C                                   | -1.48015900 | 5.91283600  | -2.03752000 |
| H                                   | -3.10839500 | 6.28853200  | -0.67322100 |
| H                                   | 0.19368100  | 5.25514000  | -3.23495100 |

|    |             |             |             |
|----|-------------|-------------|-------------|
| C  | -3.19039600 | 1.84621400  | 4.08272200  |
| H  | -1.20818600 | 1.63245200  | 4.90520200  |
| H  | -5.03256400 | 2.04326400  | 2.97569200  |
| O  | -4.05958300 | -2.22070400 | -3.29048100 |
| C  | -4.03902800 | -3.30582700 | -2.35150700 |
| C  | -2.86765900 | -1.72245100 | 3.07622200  |
| O  | -4.38896500 | -1.05656800 | 1.54472600  |
| C  | -0.55246400 | -1.96368100 | 2.63919300  |
| P  | 0.73094100  | -1.33380400 | 0.22073600  |
| H  | -1.55121700 | 6.88532700  | -2.51656900 |
| H  | -3.67988100 | 1.84885900  | 5.05230700  |
| H  | -3.41519200 | -4.11351200 | -2.74711300 |
| H  | -5.06184600 | -3.64343200 | -2.16214300 |
| C  | -1.61784400 | -2.05226600 | 3.55263100  |
| O  | -4.06360200 | -1.71858100 | 3.74349400  |
| C  | -5.05740400 | -1.32905900 | 2.78300500  |
| H  | 0.44009700  | -2.23055300 | 2.98144800  |
| C  | 2.04687400  | -2.28070200 | 1.08398700  |
| C  | 0.29267000  | -2.32527600 | -1.25552700 |
| H  | -1.46295500 | -2.36749700 | 4.57811300  |
| H  | -5.76765500 | -2.15029300 | 2.63959200  |
| H  | -5.55884500 | -0.42236500 | 3.13162500  |
| C  | 2.17477800  | -3.67470300 | 1.01396100  |
| C  | 2.95048400  | -1.55106100 | 1.87062400  |
| C  | 0.64161300  | -1.82948800 | -2.51935800 |
| C  | -0.39772700 | -3.54254000 | -1.16056100 |
| C  | 3.18590900  | -4.32474500 | 1.72242600  |
| H  | 1.49653500  | -4.25447800 | 0.39840400  |
| C  | 3.95088200  | -2.20315300 | 2.59143100  |
| C  | 0.31000100  | -2.54255300 | -3.67154000 |
| H  | 1.15824600  | -0.87604400 | -2.58958100 |
| C  | -0.70854200 | -4.26432100 | -2.31227500 |
| H  | -0.71665000 | -3.91164100 | -0.19119300 |
| C  | 4.07119400  | -3.59243500 | 2.51653300  |
| H  | 3.28221400  | -5.40452000 | 1.65284500  |
| H  | 4.64182000  | -1.62641600 | 3.19949600  |
| C  | -0.36121300 | -3.76300500 | -3.56958700 |
| H  | 0.57320000  | -2.14384500 | -4.64676200 |
| H  | -1.23118700 | -5.21303600 | -2.22808700 |
| H  | 4.85657600  | -4.10171600 | 3.06758300  |
| H  | -0.61737000 | -4.31990200 | -4.46632300 |
| H  | 2.86603900  | -0.46786000 | 1.90328900  |
| Pd | 1.21271000  | 0.85904200  | -0.25503800 |
| C  | 3.23813700  | 3.73323000  | -2.57707600 |

|             |             |             |             |
|-------------|-------------|-------------|-------------|
| N           | 2.66820500  | 2.30802400  | -1.07634300 |
| H           | 2.78698000  | 0.88488300  | -0.71747400 |
| H           | 3.35708200  | 4.14252500  | -3.57310400 |
| C           | 3.62442700  | 4.29221600  | -1.34182800 |
| H           | 4.11113000  | 5.23977500  | -1.15805500 |
| C           | 3.24947100  | 3.33729700  | -0.40627700 |
| H           | 3.34462200  | 3.31474300  | 0.67038900  |
| N           | 2.67159300  | 2.52887700  | -2.41816300 |
| <b>INT6</b> |             |             |             |
| P           | -0.88129600 | 1.60294300  | -0.22525200 |
| C           | -1.98200100 | 0.44423700  | -1.13059200 |
| C           | -1.04867900 | 3.19390400  | -1.10890100 |
| C           | -1.70705100 | 1.82188100  | 1.38935500  |
| C           | -2.32187700 | -0.80351200 | -0.52814400 |
| C           | -2.37254500 | 0.72357500  | -2.44315000 |
| C           | -1.87931200 | 4.23348100  | -0.67127800 |
| C           | -0.26826200 | 3.37505900  | -2.26206000 |
| C           | -0.92565400 | 1.75618900  | 2.55035100  |
| C           | -3.09330800 | 2.00704300  | 1.49854900  |
| C           | -3.07356800 | -1.66572000 | -1.30415400 |
| C           | -1.95969900 | -1.20012800 | 0.86166700  |
| C           | -3.10310600 | -0.19241400 | -3.22093100 |
| H           | -2.10578700 | 1.67591200  | -2.88459200 |
| C           | -1.93681700 | 5.43194200  | -1.38411500 |
| H           | -2.46870500 | 4.12037500  | 0.23116000  |
| C           | -0.33365600 | 4.57069600  | -2.97341800 |
| H           | 0.42423500  | 2.60228100  | -2.57521300 |
| C           | -1.52179300 | 1.87441900  | 3.80604200  |
| H           | 0.14318400  | 1.58297400  | 2.46293800  |
| C           | -3.68424500 | 2.14221200  | 2.75369500  |
| H           | -3.70926800 | 2.02068000  | 0.60486200  |
| C           | -3.43791800 | -1.38576400 | -2.61920800 |
| O           | -3.53174100 | -2.90903200 | -0.95242800 |
| C           | -2.95462300 | -1.25633500 | 1.82009500  |
| C           | -0.64813100 | -1.54762200 | 1.30509500  |
| H           | -3.38985900 | 0.03171700  | -4.24188200 |
| C           | -1.16877000 | 5.60145800  | -2.53701200 |
| H           | -2.57906000 | 6.23465400  | -1.03294500 |
| H           | 0.28655600  | 4.70335400  | -3.85448900 |
| C           | -2.90045200 | 2.06974400  | 3.90888200  |
| H           | -0.91206800 | 1.80611300  | 4.70191300  |
| H           | -4.75689900 | 2.29602200  | 2.83115000  |
| O           | -4.13079000 | -2.44408300 | -3.14412300 |
| C           | -4.24355000 | -3.41290300 | -2.09127400 |
| C           | -2.71421900 | -1.57771400 | 3.15427100  |



|    |             |             |             |
|----|-------------|-------------|-------------|
| O  | -4.28478600 | -0.97932600 | 1.64470600  |
| C  | -0.42206200 | -1.88664900 | 2.64299400  |
| P  | 0.78378300  | -1.40391200 | 0.16217400  |
| H  | -1.21045000 | 6.53797500  | -3.08580800 |
| H  | -3.36519300 | 2.16017300  | 4.88631300  |
| H  | -3.78941800 | -4.35298100 | -2.41549100 |
| H  | -5.29855900 | -3.54726300 | -1.82977700 |
| C  | -1.45160000 | -1.90307500 | 3.59988900  |
| O  | -3.88000400 | -1.50934900 | 3.86606700  |
| C  | -4.90262300 | -1.13321200 | 2.92978000  |
| H  | 0.57919200  | -2.14624700 | 2.96384200  |
| C  | 2.07963000  | -2.41988900 | 0.96845000  |
| C  | 0.26196900  | -2.30286800 | -1.33726700 |
| H  | -1.25992700 | -2.15788700 | 4.63572400  |
| H  | -5.65729400 | -1.92425700 | 2.87793400  |
| H  | -5.34069200 | -0.17998600 | 3.23807900  |
| C  | 2.18685900  | -3.80455100 | 0.78554000  |
| C  | 2.96794900  | -1.77197100 | 1.84034300  |
| C  | 0.53922400  | -1.73558400 | -2.58809400 |
| C  | -0.44213000 | -3.51412900 | -1.26586300 |
| C  | 3.16488300  | -4.52890000 | 1.46866200  |
| H  | 1.52396000  | -4.31993100 | 0.10062900  |
| C  | 3.93246600  | -2.50079900 | 2.53487000  |
| C  | 0.11707800  | -2.37356300 | -3.75459600 |
| H  | 1.06624300  | -0.78674800 | -2.63633800 |
| C  | -0.84416100 | -4.15849700 | -2.43427500 |
| H  | -0.70925200 | -3.93146900 | -0.30043500 |
| C  | 4.03374400  | -3.88130400 | 2.34853600  |
| H  | 3.24787500  | -5.60012100 | 1.30978600  |
| H  | 4.61219100  | -1.98825700 | 3.20911500  |
| C  | -0.57090200 | -3.58626800 | -3.67948800 |
| H  | 0.32106600  | -1.92078500 | -4.72015300 |
| H  | -1.38178300 | -5.10025000 | -2.37191900 |
| H  | 4.79302400  | -4.44811000 | 2.87943800  |
| H  | -0.90044600 | -4.08139500 | -4.58813900 |
| H  | 2.90587400  | -0.69448600 | 1.95819200  |
| Pd | 1.39562700  | 0.77679500  | -0.20091100 |
| C  | 3.05802600  | 4.35472100  | -1.49919000 |
| N  | 2.16600500  | 2.68051200  | -0.47236300 |
| H  | 2.88060400  | 0.23006200  | -0.29818900 |
| H  | 3.59683600  | 4.87051700  | -2.28576200 |
| C  | 2.51118600  | 4.87868300  | -0.31417700 |
| H  | 2.52265900  | 5.90054400  | 0.03959000  |
| C  | 1.94782900  | 3.76703900  | 0.30749400  |

|              |             |             |             |
|--------------|-------------|-------------|-------------|
| H            | 1.39815900  | 3.68260600  | 1.23596900  |
| N            | 2.85105600  | 3.02910200  | -1.59034500 |
| <b>INT7a</b> |             |             |             |
| P            | -1.09732200 | 0.24835600  | 1.13761600  |
| C            | -2.39995500 | 0.34164600  | -0.16334500 |
| C            | -1.52999500 | 1.49861000  | 2.41522800  |
| C            | -1.43244100 | -1.35364700 | 1.96041900  |
| C            | -2.43576600 | -0.69356600 | -1.15150400 |
| C            | -3.19022300 | 1.48411900  | -0.31716900 |
| C            | -1.83782600 | 1.15683500  | 3.73984900  |
| C            | -1.36917500 | 2.85889900  | 2.09339400  |
| C            | -0.36222100 | -2.23388700 | 2.16154100  |
| C            | -2.72109700 | -1.72988500 | 2.36701600  |
| C            | -3.26938600 | -0.47034600 | -2.23092400 |
| C            | -1.75085700 | -2.01665700 | -1.03802000 |
| C            | -4.02234200 | 1.68416100  | -1.43504400 |
| H            | -3.16562900 | 2.25389500  | 0.44433700  |
| C            | -1.98976900 | 2.14813700  | 4.71272600  |
| H            | -1.94874800 | 0.11577000  | 4.01981100  |
| C            | -1.53950600 | 3.84750500  | 3.05958200  |
| H            | -1.08883600 | 3.13824500  | 1.08330400  |
| C            | -0.57658100 | -3.47944700 | 2.75300000  |
| H            | 0.62986200  | -1.94648300 | 1.82491000  |
| C            | -2.93116500 | -2.96714700 | 2.97389200  |
| H            | -3.55723200 | -1.05807500 | 2.19742000  |
| C            | -4.02707100 | 0.69004500  | -2.38860600 |
| O            | -3.51689800 | -1.32299900 | -3.27856600 |
| C            | -2.50571700 | -3.10644100 | -0.64511100 |
| C            | -0.38004900 | -2.27988400 | -1.33377500 |
| H            | -4.63069900 | 2.57571500  | -1.53705300 |
| C            | -1.84666300 | 3.49459000  | 4.37728100  |
| H            | -2.22006800 | 1.86287100  | 5.73538800  |
| H            | -1.41627100 | 4.89205300  | 2.78813700  |
| C            | -1.86027100 | -3.84674100 | 3.16044100  |
| H            | 0.25541000  | -4.16409500 | 2.88848200  |
| H            | -3.92965700 | -3.24823000 | 3.29754200  |
| O            | -4.75721700 | 0.61180600  | -3.54754200 |
| C            | -4.27674100 | -0.56014300 | -4.22429100 |
| C            | -1.98032500 | -4.38740100 | -0.49358600 |
| O            | -3.83914300 | -3.11389600 | -0.32125000 |
| C            | 0.13184600  | -3.57393700 | -1.19404100 |
| P            | 0.72478200  | -0.86506400 | -1.73697100 |
| H            | -1.96544300 | 4.26336600  | 5.13529600  |
| H            | -2.02842900 | -4.81655300 | 3.61972400  |
| H            | -3.62415100 | -0.26037300 | -5.05278900 |

|    |             |             |             |
|----|-------------|-------------|-------------|
| H  | -5.12580800 | -1.15319600 | -4.56913900 |
| C  | -0.65735000 | -4.65700300 | -0.76507900 |
| O  | -2.95915500 | -5.24437200 | -0.06213800 |
| C  | -4.14836200 | -4.45323900 | 0.08421900  |
| H  | 1.17534600  | -3.75663600 | -1.41813200 |
| C  | 2.30307000  | -1.70472600 | -2.16081700 |
| C  | 0.05572800  | -0.28141800 | -3.34422400 |
| H  | -0.24325800 | -5.65248800 | -0.65194200 |
| H  | -4.93513900 | -4.85577600 | -0.56136300 |
| H  | -4.45320600 | -4.45211800 | 1.13481100  |
| C  | 2.57820500  | -2.28604000 | -3.40544500 |
| C  | 3.26808200  | -1.78055100 | -1.14498800 |
| C  | 0.08931800  | 1.09457500  | -3.61351800 |
| C  | -0.48500400 | -1.15301400 | -4.30017300 |
| C  | 3.79183700  | -2.93494700 | -3.62772100 |
| H  | 1.85649900  | -2.21449000 | -4.21101200 |
| C  | 4.47691700  | -2.44066500 | -1.36359700 |
| C  | -0.38055900 | 1.58806300  | -4.83112600 |
| H  | 0.47740600  | 1.76957300  | -2.85592100 |
| C  | -0.94780700 | -0.66005900 | -5.52063800 |
| H  | -0.55775600 | -2.21386500 | -4.08257700 |
| C  | 4.74186500  | -3.01462700 | -2.60903700 |
| H  | 4.00807100  | -3.34888500 | -4.60712000 |
| H  | 5.21671500  | -2.49054400 | -0.56950700 |
| C  | -0.89319500 | 0.71039700  | -5.78968600 |
| H  | -0.35154200 | 2.65568800  | -5.02894200 |
| H  | -1.35646600 | -1.34471800 | -6.25879200 |
| H  | 5.69149300  | -3.50943800 | -2.79007300 |
| H  | -1.25682300 | 1.09301600  | -6.73920500 |
| H  | 3.06570300  | -1.30297200 | -0.18959900 |
| C  | 3.38665600  | 2.46372500  | -1.12871200 |
| C  | 2.48138300  | 2.13836900  | -0.21355900 |
| C  | 1.81952200  | 2.42249000  | 0.97802300  |
| Pd | 0.90153500  | 0.75576700  | -0.03429900 |
| C  | 3.52234100  | 1.80666300  | -2.47510600 |
| H  | 3.38579700  | 2.56450900  | -3.26214400 |
| H  | 2.71039900  | 1.08593400  | -2.58501500 |
| C  | 4.85962200  | 1.09382500  | -2.69906900 |
| H  | 5.68505700  | 1.81396800  | -2.60417700 |
| H  | 5.00168700  | 0.36357600  | -1.89276900 |
| C  | 4.97967400  | 0.36595000  | -4.02553100 |
| C  | 3.94700700  | 0.33548600  | -4.96988300 |
| C  | 6.15766400  | -0.33882300 | -4.31435500 |
| C  | 4.08234600  | -0.38395300 | -6.16015700 |

|             |             |             |             |
|-------------|-------------|-------------|-------------|
| H           | 3.01652400  | 0.85771100  | -4.77700600 |
| C           | 6.29911700  | -1.05763200 | -5.49952900 |
| H           | 6.96906800  | -0.32985100 | -3.58969100 |
| C           | 5.25637200  | -1.08582600 | -6.43026900 |
| H           | 3.26134700  | -0.39766700 | -6.87242500 |
| H           | 7.22089900  | -1.59883900 | -5.69692400 |
| H           | 5.36163400  | -1.64673000 | -7.35499300 |
| H           | 1.12941800  | 3.26940400  | 0.96408500  |
| C           | 2.26715600  | 2.03873700  | 2.37505900  |
| H           | 3.00021300  | 1.22444400  | 2.33783200  |
| H           | 1.40630200  | 1.66794900  | 2.94439900  |
| C           | 2.85913500  | 3.23962400  | 3.14949800  |
| H           | 3.80707800  | 3.54406000  | 2.69039800  |
| H           | 2.16644400  | 4.08567800  | 3.04745200  |
| C           | 3.05193700  | 2.92002800  | 4.61188800  |
| C           | 1.94378000  | 2.88544400  | 5.47224800  |
| C           | 4.31102100  | 2.59900000  | 5.13218900  |
| C           | 2.09224000  | 2.54221300  | 6.81556800  |
| H           | 0.95843200  | 3.12955700  | 5.08151700  |
| C           | 4.46487200  | 2.25633700  | 6.47772600  |
| H           | 5.17836900  | 2.62032400  | 4.47632700  |
| C           | 3.35536000  | 2.22664800  | 7.32429400  |
| H           | 1.22231700  | 2.52355400  | 7.46698300  |
| H           | 5.45145400  | 2.01421300  | 6.86396200  |
| H           | 3.47295600  | 1.96149700  | 8.37135200  |
| H           | 4.07793800  | 3.28844600  | -0.92512600 |
| <b>TS6a</b> |             |             |             |
| P           | -1.15816800 | 0.57493900  | 0.79634500  |
| C           | -2.52080700 | 0.35211800  | -0.41678600 |
| C           | -1.59907200 | 2.07686500  | 1.74777400  |
| C           | -1.35939900 | -0.82503800 | 1.95152100  |
| C           | -2.60988500 | -0.88050200 | -1.13285800 |
| C           | -3.35913300 | 1.42003100  | -0.75147100 |
| C           | -2.04272500 | 2.04423200  | 3.07577100  |
| C           | -1.37320900 | 3.32240600  | 1.13575900  |
| C           | -0.22688900 | -1.57504500 | 2.29620500  |
| C           | -2.61516400 | -1.17952400 | 2.46717300  |
| C           | -3.56108200 | -0.93077600 | -2.13513300 |
| C           | -1.81715100 | -2.11163800 | -0.84575300 |
| C           | -4.30130500 | 1.34313600  | -1.79329200 |
| H           | -3.28824100 | 2.34538700  | -0.19367400 |
| C           | -2.27223100 | 3.23352600  | 3.77158300  |
| H           | -2.19759600 | 1.09407000  | 3.57344600  |
| C           | -1.62127100 | 4.50722100  | 1.82520700  |
| H           | -0.99073000 | 3.35734600  | 0.11943800  |

|   |             |             |             |
|---|-------------|-------------|-------------|
| C | -0.35508900 | -2.67272200 | 3.14842400  |
| H | 0.74864300  | -1.32357100 | 1.88856700  |
| C | -2.73318200 | -2.26545500 | 3.33308000  |
| H | -3.49828200 | -0.61720800 | 2.17900300  |
| C | -4.37196600 | 0.14898800  | -2.47673400 |
| O | -3.85359700 | -2.00016000 | -2.94253100 |
| C | -2.44556200 | -3.16712300 | -0.21198500 |
| C | -0.45942800 | -2.33081800 | -1.23031700 |
| H | -4.94126400 | 2.18188900  | -2.04245400 |
| C | -2.06939000 | 4.46516300  | 3.14846200  |
| H | -2.60905800 | 3.19371400  | 4.80350300  |
| H | -1.44870500 | 5.46178700  | 1.33652700  |
| C | -1.60349800 | -3.01842900 | 3.66888100  |
| H | 0.52488000  | -3.25654600 | 3.40217300  |
| H | -3.70548600 | -2.52788400 | 3.74094700  |
| O | -5.19482700 | -0.19725300 | -3.51586500 |
| C | -4.82901000 | -1.53652000 | -3.88494800 |
| C | -1.80867800 | -4.36995500 | 0.08430700  |
| O | -3.74378000 | -3.21232700 | 0.22915100  |
| C | 0.15921900  | -3.55291300 | -0.95290100 |
| P | 0.50044800  | -0.91601400 | -1.90674400 |
| H | -2.24886200 | 5.38801400  | 3.69232400  |
| H | -1.69959300 | -3.87259600 | 4.33318900  |
| H | -4.38752700 | -1.52697000 | -4.88638100 |
| H | -5.71206000 | -2.17987900 | -3.83983100 |
| C | -0.50140600 | -4.59907400 | -0.28380600 |
| O | -2.67757500 | -5.20989400 | 0.72935900  |
| C | -3.89228100 | -4.46540600 | 0.90963700  |
| H | 1.18612500  | -3.71044900 | -1.25605600 |
| C | 2.04505500  | -1.63476700 | -2.57074200 |
| C | -0.47452200 | -0.38719400 | -3.35955200 |
| H | -0.00411000 | -5.53809100 | -0.06969200 |
| H | -4.72695400 | -5.01958300 | 0.47148600  |
| H | -4.04659700 | -4.28102100 | 1.97719000  |
| C | 2.38316100  | -1.60065800 | -3.92936000 |
| C | 2.99553800  | -2.08737100 | -1.63773300 |
| C | -0.78341800 | 0.97275900  | -3.49376600 |
| C | -0.96131900 | -1.30344500 | -4.30274500 |
| C | 3.64811800  | -2.02038300 | -4.34882500 |
| H | 1.67229400  | -1.22929400 | -4.65929600 |
| C | 4.24666500  | -2.52612300 | -2.06386400 |
| C | -1.57656500 | 1.41221200  | -4.55360700 |
| H | -0.42202300 | 1.67241600  | -2.74516500 |
| C | -1.73712200 | -0.85981600 | -5.37293600 |

|    |             |             |             |
|----|-------------|-------------|-------------|
| H  | -0.74417000 | -2.36132200 | -4.18958300 |
| C  | 4.57802400  | -2.48877400 | -3.42135300 |
| H  | 3.91369300  | -1.96142200 | -5.39952600 |
| H  | 4.96916900  | -2.86728800 | -1.32803600 |
| C  | -2.05296000 | 0.49681900  | -5.49452400 |
| H  | -1.82849200 | 2.46496300  | -4.64086400 |
| H  | -2.10263500 | -1.57253800 | -6.10700200 |
| H  | 5.56396000  | -2.79699000 | -3.75238600 |
| H  | -2.67130700 | 0.83791200  | -6.31982700 |
| H  | 2.76889900  | -2.06746800 | -0.57662500 |
| C  | 2.93358300  | 2.15901200  | -1.13599700 |
| C  | 2.82907400  | 1.63450700  | 0.13022600  |
| C  | 1.86412400  | 2.15724200  | 1.04779800  |
| Pd | 0.91012700  | 0.71252800  | -0.24265000 |
| C  | 3.60643200  | 1.44755200  | -2.27473900 |
| H  | 2.96795900  | 1.46516800  | -3.16889000 |
| H  | 3.75297000  | 0.40063200  | -2.00449900 |
| C  | 4.97575400  | 2.06407400  | -2.65125100 |
| H  | 4.83136600  | 3.09700600  | -2.99416900 |
| H  | 5.60278900  | 2.10836500  | -1.75299900 |
| C  | 5.65989200  | 1.24229600  | -3.71779100 |
| C  | 5.23080800  | 1.30085000  | -5.05092200 |
| C  | 6.68882400  | 0.35237100  | -3.38891400 |
| C  | 5.81087300  | 0.49114600  | -6.02737100 |
| H  | 4.43198200  | 1.98704600  | -5.32322800 |
| C  | 7.27742000  | -0.45655900 | -4.36256300 |
| H  | 7.02623800  | 0.28964500  | -2.35716600 |
| C  | 6.83805900  | -0.39262200 | -5.68583600 |
| H  | 5.46492400  | 0.55254400  | -7.05584200 |
| H  | 8.07756300  | -1.13826000 | -4.08643000 |
| H  | 7.29410400  | -1.02140500 | -6.44549300 |
| H  | 1.32757300  | 3.08991400  | 0.82470900  |
| C  | 1.93040400  | 1.78779400  | 2.51394700  |
| H  | 1.96906600  | 0.69896700  | 2.61414700  |
| H  | 1.02733400  | 2.12385600  | 3.03695000  |
| C  | 3.18134700  | 2.36220400  | 3.22036900  |
| H  | 4.05737000  | 2.11111000  | 2.61047100  |
| H  | 3.11662700  | 3.45678500  | 3.26094700  |
| C  | 3.34017200  | 1.78646500  | 4.60601500  |
| C  | 2.89091100  | 2.47567700  | 5.73875600  |
| C  | 3.88751600  | 0.50512500  | 4.77473700  |
| C  | 2.98646900  | 1.90568000  | 7.01043000  |
| H  | 2.46188200  | 3.46833400  | 5.62086200  |
| C  | 3.98345600  | -0.06762900 | 6.04259700  |

|              |             |             |             |
|--------------|-------------|-------------|-------------|
| H            | 4.23756300  | -0.04457200 | 3.90542700  |
| C            | 3.53330600  | 0.63065700  | 7.16664500  |
| H            | 2.63546000  | 2.45817700  | 7.87823700  |
| H            | 4.41215500  | -1.06041800 | 6.15236800  |
| H            | 3.60971600  | 0.18549800  | 8.15496900  |
| H            | 3.61444400  | 0.18150400  | 0.74809200  |
| H            | 2.65209900  | 3.20642900  | -1.34543400 |
| C            | 5.29732400  | -1.03195100 | 1.49979900  |
| C            | 5.28062700  | -2.24739800 | 2.17635300  |
| C            | 3.90996900  | -2.56081300 | 2.28647400  |
| N            | 4.01385800  | -0.69344300 | 1.25237100  |
| H            | 6.11430700  | -0.39679300 | 1.18647700  |
| H            | 6.12776600  | -2.81426400 | 2.53541900  |
| H            | 3.44604200  | -3.42482300 | 2.74572100  |
| N            | 3.14661600  | -1.61336300 | 1.72410000  |
| <b>INT8a</b> |             |             |             |
| P            | -1.57355300 | 1.28949300  | -0.84135700 |
| C            | -2.64334400 | -0.06948600 | -1.46312900 |
| C            | -1.55473900 | 2.49412200  | -2.22314900 |
| C            | -2.60489000 | 2.07532000  | 0.44639500  |
| C            | -2.96025300 | -1.14197800 | -0.58002200 |
| C            | -3.08061000 | -0.10382700 | -2.79118600 |
| C            | -2.10930900 | 3.77415400  | -2.11062100 |
| C            | -0.83666000 | 2.16161900  | -3.38498400 |
| C            | -1.96135000 | 2.61308200  | 1.56829500  |
| C            | -4.00150100 | 2.14453300  | 0.34085600  |
| C            | -3.69884700 | -2.17723700 | -1.12203900 |
| C            | -2.59469900 | -1.22703500 | 0.86300500  |
| C            | -3.81228600 | -1.18251200 | -3.31892200 |
| H            | -2.85186200 | 0.72400000  | -3.44899100 |
| C            | -1.93316800 | 4.71181000  | -3.13157900 |
| H            | -2.65560600 | 4.04997100  | -1.21524900 |
| C            | -0.69340800 | 3.08566900  | -4.41714500 |
| H            | -0.37317500 | 1.18217700  | -3.46605800 |
| C            | -2.71241300 | 3.20996400  | 2.58220600  |
| H            | -0.88202300 | 2.52658800  | 1.65658900  |
| C            | -4.74651800 | 2.75046700  | 1.35170200  |
| H            | -4.50100900 | 1.71534800  | -0.52204800 |
| C            | -4.09806700 | -2.21665900 | -2.45540600 |
| O            | -4.11651300 | -3.31508400 | -0.48148200 |
| C            | -3.58228000 | -1.04265900 | 1.81118700  |
| C            | -1.31339700 | -1.61614300 | 1.36230800  |
| H            | -4.13185000 | -1.19841000 | -4.35457100 |
| C            | -1.22861400 | 4.37100600  | -4.28488900 |
| H            | -2.32863400 | 5.71561500  | -3.01501700 |

|   |             |             |             |
|---|-------------|-------------|-------------|
| H | -0.13859600 | 2.81436800  | -5.31087200 |
| C | -4.10316200 | 3.27968800  | 2.47557000  |
| H | -2.20897900 | 3.60796800  | 3.45848300  |
| H | -5.82840700 | 2.80411400  | 1.26683900  |
| O | -4.77310900 | -3.38123300 | -2.70522000 |
| C | -4.79968300 | -4.10431300 | -1.46438500 |
| C | -3.37008500 | -1.21731500 | 3.17966700  |
| O | -4.89663000 | -0.71307100 | 1.59111400  |
| C | -1.12098700 | -1.81639800 | 2.73088600  |
| P | 0.12124100  | -1.59667500 | 0.21976700  |
| H | -1.08013600 | 5.10823700  | -5.06721800 |
| H | -4.68723900 | 3.74265000  | 3.26616300  |
| H | -4.27774400 | -5.05705500 | -1.59078600 |
| H | -5.83806400 | -4.25522900 | -1.15273300 |
| C | -2.15078600 | -1.62878200 | 3.67117500  |
| O | -4.53616300 | -0.98130300 | 3.85987400  |
| C | -5.44310900 | -0.43841900 | 2.88738600  |
| H | -0.14080700 | -2.09694900 | 3.09417700  |
| C | 1.45719500  | -2.50062300 | 1.09897800  |
| C | -0.37803000 | -2.70059200 | -1.14968800 |
| H | -1.98449700 | -1.78462300 | 4.73078000  |
| H | -6.41322300 | -0.92880100 | 2.98300700  |
| H | -5.51685300 | 0.64700700  | 3.02488600  |
| C | 1.81499300  | -3.82135700 | 0.79323700  |
| C | 2.18818500  | -1.79890300 | 2.07328300  |
| C | -0.16349400 | -2.27783200 | -2.46632700 |
| C | -0.99238100 | -3.93926600 | -0.91175300 |
| C | 2.87164900  | -4.43775300 | 1.46642700  |
| H | 1.28521500  | -4.36919400 | 0.02328800  |
| C | 3.23830800  | -2.42208400 | 2.74517700  |
| C | -0.55718600 | -3.08271200 | -3.53584700 |
| H | 0.28869200  | -1.30472700 | -2.63665800 |
| C | -1.37139200 | -4.74861900 | -1.98128500 |
| H | -1.19152400 | -4.25700500 | 0.10693900  |
| C | 3.58198700  | -3.74329000 | 2.44716000  |
| H | 3.14266700  | -5.45935300 | 1.21562400  |
| H | 3.78815000  | -1.86382400 | 3.49689300  |
| C | -1.15888400 | -4.31906300 | -3.29448900 |
| H | -0.40213200 | -2.74160500 | -4.55515200 |
| H | -1.83787300 | -5.71123700 | -1.79157700 |
| H | 4.40487200  | -4.22492900 | 2.96783000  |
| H | -1.46796600 | -4.94493400 | -4.12653200 |
| H | 1.94731000  | -0.76641900 | 2.28971700  |
| C | 1.81148600  | 2.59007900  | -0.59000900 |



|    |             |             |             |
|----|-------------|-------------|-------------|
| C  | 2.44129600  | 1.53089400  | -1.26525600 |
| C  | 2.83909500  | 0.38621700  | -0.53489600 |
| Pd | 0.63177800  | 0.63698200  | -0.26715700 |
| C  | 1.23353100  | 3.78515100  | -1.27974000 |
| H  | 0.28588900  | 4.05471000  | -0.80349300 |
| H  | 1.00443500  | 3.55656200  | -2.32259100 |
| C  | 2.14129500  | 5.03806500  | -1.24532200 |
| H  | 2.35293700  | 5.31115100  | -0.20447500 |
| H  | 3.10069900  | 4.81137200  | -1.72512100 |
| C  | 1.44158800  | 6.16682700  | -1.96520700 |
| C  | 0.47116300  | 6.93501200  | -1.30863000 |
| C  | 1.66116700  | 6.39317800  | -3.32914600 |
| C  | -0.26451500 | 7.90007900  | -1.99709900 |
| H  | 0.28693200  | 6.76747900  | -0.24984600 |
| C  | 0.92970200  | 7.35848200  | -4.02321100 |
| H  | 2.40707900  | 5.79953800  | -3.85254300 |
| C  | -0.03943400 | 8.11345400  | -3.35947800 |
| H  | -1.01187200 | 8.48735900  | -1.47023200 |
| H  | 1.11686100  | 7.52107900  | -5.08135000 |
| H  | -0.61008400 | 8.86580900  | -3.89676300 |
| C  | 3.41353800  | -0.82514200 | -1.21344200 |
| H  | 3.04115800  | -1.73562600 | -0.73689100 |
| H  | 3.10026300  | -0.86332400 | -2.26454400 |
| C  | 4.95852700  | -0.85864100 | -1.13186000 |
| H  | 5.25052500  | -0.75159700 | -0.07964900 |
| H  | 5.37377400  | 0.00135100  | -1.67041000 |
| C  | 5.50544900  | -2.15010400 | -1.68995000 |
| C  | 5.45984400  | -3.32054400 | -0.91924900 |
| C  | 6.00609100  | -2.22708500 | -2.99479200 |
| C  | 5.90249600  | -4.53621700 | -1.43939500 |
| H  | 5.06955500  | -3.27544600 | 0.09380100  |
| C  | 6.45328400  | -3.44211700 | -3.51916800 |
| H  | 6.04714800  | -1.32667300 | -3.60358400 |
| C  | 6.40179400  | -4.60146100 | -2.74304800 |
| H  | 5.86003300  | -5.43249600 | -0.82601300 |
| H  | 6.84277500  | -3.48215300 | -4.53294700 |
| H  | 6.74978300  | -5.54715500 | -3.14923700 |
| H  | 3.08607800  | 0.53733800  | 0.51732300  |
| H  | 2.02181100  | 2.68353100  | 0.47436600  |
| H  | 2.41596700  | 1.49549600  | -2.35492600 |
| C  | 2.56587800  | 1.40782200  | 3.74950000  |
| C  | 1.37454500  | 1.06085800  | 4.40808000  |
| C  | 0.43535000  | 1.01571200  | 3.37153300  |
| N  | 2.35430700  | 1.55467300  | 2.42573700  |

|              |             |             |             |
|--------------|-------------|-------------|-------------|
| H            | 3.55622400  | 1.56314300  | 4.16523700  |
| H            | 1.21545900  | 0.88365300  | 5.46410100  |
| H            | -0.62227500 | 0.79408300  | 3.41340600  |
| N            | 1.02916400  | 1.30896400  | 2.19102300  |
| <b>INT7b</b> |             |             |             |
| P            | -2.19441800 | 1.03655700  | 0.23666800  |
| C            | -2.95895500 | 0.11054700  | -1.16009800 |
| C            | -2.35530100 | 2.79656700  | -0.27551200 |
| C            | -3.41138100 | 0.81778600  | 1.59088600  |
| C            | -3.31139800 | -1.26588100 | -0.99933100 |
| C            | -3.03427500 | 0.71037900  | -2.42159200 |
| C            | -3.52593500 | 3.55656700  | -0.14392100 |
| C            | -1.21325700 | 3.39593700  | -0.82885200 |
| C            | -2.91718500 | 0.57700700  | 2.88030200  |
| C            | -4.79770200 | 0.83429500  | 1.38042900  |
| C            | -3.74488800 | -1.91373000 | -2.14268200 |
| C            | -3.29742400 | -2.03817700 | 0.28043000  |
| C            | -3.45029100 | 0.01269300  | -3.56969200 |
| H            | -2.75778900 | 1.75284500  | -2.52741800 |
| C            | -3.55368500 | 4.88709100  | -0.56333200 |
| H            | -4.41397700 | 3.11828900  | 0.29699500  |
| C            | -1.24583000 | 4.72262200  | -1.26059500 |
| H            | -0.29649900 | 2.81707100  | -0.89865900 |
| C            | -3.79379800 | 0.35722400  | 3.94318000  |
| H            | -1.84132900 | 0.54164500  | 3.03248000  |
| C            | -5.67328800 | 0.63368700  | 2.44689300  |
| H            | -5.19139700 | 0.96623000  | 0.37778100  |
| C            | -3.79878300 | -1.30848800 | -3.39558500 |
| O            | -4.15915600 | -3.21843200 | -2.24407700 |
| C            | -4.50391200 | -2.36141500 | 0.87398300  |
| C            | -2.13097200 | -2.56013600 | 0.92081800  |
| H            | -3.49596300 | 0.49196400  | -4.54100100 |
| C            | -2.41670400 | 5.47132100  | -1.12688500 |
| H            | -4.46456100 | 5.46816500  | -0.44910500 |
| H            | -0.35423700 | 5.17281500  | -1.68779600 |
| C            | -5.17333400 | 0.38783500  | 3.72828700  |
| H            | -3.40089500 | 0.15690300  | 4.93581100  |
| H            | -6.74594800 | 0.65817700  | 2.27566800  |
| O            | -4.24128700 | -2.20860100 | -4.33024200 |
| C            | -4.42940800 | -3.44888700 | -3.63239900 |
| C            | -4.60520400 | -3.09572700 | 2.05321300  |
| O            | -5.75783800 | -2.01176700 | 0.44004100  |
| C            | -2.24649600 | -3.31763300 | 2.08972200  |
| P            | -0.48686600 | -2.04011700 | 0.28899600  |
| H            | -2.44163600 | 6.50760200  | -1.45184600 |

|    |             |             |             |
|----|-------------|-------------|-------------|
| H  | -5.85709600 | 0.21517400  | 4.55444900  |
| H  | -3.72474800 | -4.19097700 | -4.01974500 |
| H  | -5.46572800 | -3.77955500 | -3.75047900 |
| C  | -3.48923200 | -3.59592400 | 2.68771100  |
| O  | -5.92249900 | -3.22146300 | 2.41234100  |
| C  | -6.68091500 | -2.55340500 | 1.39339000  |
| H  | -1.35106200 | -3.70792900 | 2.55866400  |
| C  | 0.73542100  | -3.15470400 | 1.08785800  |
| C  | -0.52648800 | -2.57493300 | -1.46161700 |
| H  | -3.56444000 | -4.17937000 | 3.59829400  |
| H  | -7.33659600 | -3.27468200 | 0.89422500  |
| H  | -7.25487400 | -1.73960000 | 1.84571600  |
| C  | 1.41530500  | -4.17386000 | 0.40792700  |
| C  | 1.10606200  | -2.86112700 | 2.41239500  |
| C  | -0.07590500 | -1.67620600 | -2.43724900 |
| C  | -1.02685500 | -3.82486700 | -1.85378700 |
| C  | 2.43610700  | -4.88811200 | 1.04080100  |
| H  | 1.16221200  | -4.40334800 | -0.62076200 |
| C  | 2.11071700  | -3.58624200 | 3.04869600  |
| C  | -0.13171700 | -2.01815500 | -3.78860800 |
| H  | 0.29218200  | -0.70210400 | -2.12651000 |
| C  | -1.06353500 | -4.17321300 | -3.20330900 |
| H  | -1.40280800 | -4.51496300 | -1.10449700 |
| C  | 2.78391200  | -4.60101400 | 2.36103900  |
| H  | 2.96106000  | -5.66809300 | 0.49642400  |
| H  | 2.38081400  | -3.34887200 | 4.07367100  |
| C  | -0.62401800 | -3.26708100 | -4.17292100 |
| H  | 0.20314800  | -1.30921200 | -4.54007100 |
| H  | -1.44138400 | -5.14796800 | -3.49946400 |
| H  | 3.57915500  | -5.15645000 | 2.84970300  |
| H  | -0.66816300 | -3.53396000 | -5.22491700 |
| H  | 0.61547600  | -2.04402900 | 2.93388100  |
| C  | 1.66705200  | 2.91469500  | 1.32927700  |
| C  | 1.47796300  | 1.60469400  | 1.22781600  |
| C  | 2.02169000  | 0.32208800  | 1.32773200  |
| Pd | -0.02871400 | 0.24294600  | 0.70415900  |
| C  | 2.99635300  | -0.29033600 | 0.33954900  |
| H  | 2.70498200  | -1.32486000 | 0.12270800  |
| H  | 2.96725200  | 0.25492400  | -0.61101700 |
| C  | 4.44432700  | -0.31353300 | 0.88019300  |
| H  | 4.80922600  | 0.71330500  | 1.00072800  |
| H  | 4.42974700  | -0.76887000 | 1.87942300  |
| C  | 5.36149300  | -1.10005300 | -0.02401500 |
| C  | 5.32165600  | -2.50249600 | -0.01597300 |

|             |             |             |             |
|-------------|-------------|-------------|-------------|
| C           | 6.22023900  | -0.46185800 | -0.92658200 |
| C           | 6.11971100  | -3.24549300 | -0.88531700 |
| H           | 4.65609000  | -3.01186000 | 0.67687900  |
| C           | 7.02282600  | -1.20189100 | -1.79803800 |
| H           | 6.26009400  | 0.62486700  | -0.94449100 |
| C           | 6.97485500  | -2.59693500 | -1.78065100 |
| H           | 6.07626200  | -4.33137300 | -0.86293500 |
| H           | 7.68612700  | -0.68829300 | -2.48898300 |
| H           | 7.59900200  | -3.17425900 | -2.45713900 |
| H           | 2.05604300  | -0.13633400 | 2.32034200  |
| C           | 2.95758700  | 3.54843900  | 1.79243500  |
| H           | 3.75095400  | 2.79337100  | 1.82931800  |
| H           | 3.28214700  | 4.32193700  | 1.08100100  |
| C           | 2.81771700  | 4.20056500  | 3.18827200  |
| H           | 2.01777900  | 4.95071100  | 3.15380800  |
| H           | 2.50023300  | 3.42780200  | 3.89900500  |
| C           | 4.10610900  | 4.83624500  | 3.65154500  |
| C           | 5.08648200  | 4.07072900  | 4.29773700  |
| C           | 4.37638400  | 6.18737700  | 3.39853900  |
| C           | 6.30168700  | 4.63802900  | 4.68283700  |
| H           | 4.89072800  | 3.02021800  | 4.50114900  |
| C           | 5.59028100  | 6.76063600  | 3.78152600  |
| H           | 3.62492600  | 6.79480800  | 2.89910300  |
| C           | 6.55800600  | 5.98699000  | 4.42569900  |
| H           | 7.04715100  | 4.02852400  | 5.18664900  |
| H           | 5.77874800  | 7.81182500  | 3.58017100  |
| H           | 7.50231500  | 6.43153400  | 4.72728700  |
| H           | 0.84872800  | 3.60151800  | 1.11046900  |
| <b>TS6b</b> |             |             |             |
| P           | -2.09663700 | 1.29063600  | 0.38695800  |
| C           | -2.65220900 | 0.20522700  | -0.99059600 |
| C           | -2.42620800 | 3.00849200  | -0.17379800 |
| C           | -3.32802700 | 0.97953500  | 1.70492200  |
| C           | -2.87812900 | -1.18433000 | -0.74093500 |
| C           | -2.66144200 | 0.69521000  | -2.29932800 |
| C           | -3.52748400 | 3.77179300  | 0.23725200  |
| C           | -1.47166700 | 3.59131600  | -1.02404100 |
| C           | -2.87535000 | 0.73466500  | 3.00719800  |
| C           | -4.70517100 | 0.94991700  | 1.43816600  |
| C           | -3.13075400 | -1.96385000 | -1.85493000 |
| C           | -2.89435400 | -1.83932500 | 0.60069700  |
| C           | -2.89109400 | -0.13241800 | -3.41286400 |
| H           | -2.46841800 | 1.74585900  | -2.47519100 |
| C           | -3.67898900 | 5.08573800  | -0.21105500 |
| H           | -4.26299700 | 3.35269100  | 0.91361200  |

|   |             |             |             |
|---|-------------|-------------|-------------|
| C | -1.63659200 | 4.89611700  | -1.48584300 |
| H | -0.60219100 | 3.01976500  | -1.32275400 |
| C | -3.78407600 | 0.46463600  | 4.03060000  |
| H | -1.80923800 | 0.73083200  | 3.20568800  |
| C | -5.61333900 | 0.69885700  | 2.46552400  |
| H | -5.06276200 | 1.10085200  | 0.42434300  |
| C | -3.12153000 | -1.46619300 | -3.15581700 |
| O | -3.40927900 | -3.30690200 | -1.87716100 |
| C | -4.10329700 | -2.23828200 | 1.13852200  |
| C | -1.73587000 | -2.15066600 | 1.37583600  |
| H | -2.88529400 | 0.26224500  | -4.42241300 |
| C | -2.74108300 | 5.64826700  | -1.07851600 |
| H | -4.53412900 | 5.66869500  | 0.11963100  |
| H | -0.89392800 | 5.31836000  | -2.15572400 |
| C | -5.15402000 | 0.44963600  | 3.76199300  |
| H | -3.42151600 | 0.25975200  | 5.03363500  |
| H | -6.67875100 | 0.68900100  | 2.25307700  |
| O | -3.38253800 | -2.47809500 | -4.04234900 |
| C | -3.47617300 | -3.67881100 | -3.26005200 |
| C | -4.22042200 | -2.86164900 | 2.37897200  |
| O | -5.34803700 | -2.06819000 | 0.58895400  |
| C | -1.86332100 | -2.79774700 | 2.60834400  |
| P | -0.10721300 | -1.55462400 | 0.77624900  |
| H | -2.86558500 | 6.66936100  | -1.42778200 |
| H | -5.86242200 | 0.23865300  | 4.55779500  |
| H | -2.63164900 | -4.33279900 | -3.49905000 |
| H | -4.43435800 | -4.16702700 | -3.45791100 |
| C | -3.11286100 | -3.16283900 | 3.14068700  |
| O | -5.54030700 | -3.09878600 | 2.65787200  |
| C | -6.28439500 | -2.59390300 | 1.53838200  |
| H | -0.97467800 | -3.03210400 | 3.18119100  |
| C | 1.12887900  | -2.36192000 | 1.86145000  |
| C | 0.05365500  | -2.36262000 | -0.85456100 |
| H | -3.19856900 | -3.65742600 | 4.10145600  |
| H | -6.84932500 | -3.41058400 | 1.07797500  |
| H | -6.94553100 | -1.79134700 | 1.87771600  |
| C | 1.99694400  | -3.36747700 | 1.41819200  |
| C | 1.28658100  | -1.85379100 | 3.16326400  |
| C | 0.44213300  | -1.58427000 | -1.95208700 |
| C | -0.25390300 | -3.71969500 | -1.03378500 |
| C | 2.99143500  | -3.86508700 | 2.26502100  |
| H | 1.90760200  | -3.75665200 | 0.41048400  |
| C | 2.26335500  | -2.36653500 | 4.01363000  |
| C | 0.52557400  | -2.16339400 | -3.21900400 |

|    |             |             |             |
|----|-------------|-------------|-------------|
| H  | 0.64477000  | -0.52376100 | -1.83516100 |
| C  | -0.15292700 | -4.29674100 | -2.29882500 |
| H  | -0.58332600 | -4.31664700 | -0.18844100 |
| C  | 3.12405300  | -3.37235000 | 3.56331500  |
| H  | 3.66084000  | -4.64123900 | 1.90505600  |
| H  | 2.35854500  | -1.97181300 | 5.02068500  |
| C  | 0.23286600  | -3.51704900 | -3.39449800 |
| H  | 0.81384700  | -1.54807300 | -4.06627400 |
| H  | -0.38351100 | -5.35014600 | -2.43227100 |
| H  | 3.89599500  | -3.76326400 | 4.21962500  |
| H  | 0.29981100  | -3.96587300 | -4.38170300 |
| H  | 0.64210500  | -1.05006900 | 3.50763700  |
| C  | 1.35622500  | 2.92136400  | 1.67191500  |
| C  | 1.86476000  | 2.08953800  | 0.69943500  |
| C  | 2.32514900  | 0.77412100  | 1.00518800  |
| Pd | 0.16890900  | 0.75107100  | 0.73752300  |
| C  | 3.20107100  | -0.01526300 | 0.06486000  |
| H  | 2.92570100  | -1.07598200 | 0.08865700  |
| H  | 3.06080600  | 0.32856600  | -0.96554600 |
| C  | 4.69564800  | 0.08681200  | 0.44858100  |
| H  | 5.03024600  | 1.12369200  | 0.32379600  |
| H  | 4.79937600  | -0.15863400 | 1.51376000  |
| C  | 5.54547400  | -0.84891500 | -0.37489200 |
| C  | 5.65533200  | -2.20051000 | -0.01734000 |
| C  | 6.18572500  | -0.41337100 | -1.54142600 |
| C  | 6.38723600  | -3.09185600 | -0.80183300 |
| H  | 5.15716100  | -2.55152700 | 0.88338300  |
| C  | 6.92050200  | -1.30138500 | -2.32982500 |
| H  | 6.10585000  | 0.63147100  | -1.83247400 |
| C  | 7.02423400  | -2.64445400 | -1.96232900 |
| H  | 6.46357100  | -4.13522300 | -0.50661900 |
| H  | 7.41326400  | -0.94359500 | -3.22998900 |
| H  | 7.59708700  | -3.33625300 | -2.57365500 |
| H  | 2.39047000  | 0.41418900  | 2.04120000  |
| C  | 1.69325300  | 2.88449600  | 3.14423100  |
| H  | 2.63064600  | 2.34140900  | 3.29735000  |
| H  | 1.82953400  | 3.89547900  | 3.54937100  |
| C  | 0.56294800  | 2.17683600  | 3.93645500  |
| H  | -0.34882700 | 2.78298200  | 3.88793700  |
| H  | 0.33633300  | 1.24061400  | 3.40940900  |
| C  | 0.92115500  | 1.87782600  | 5.37128500  |
| C  | 1.94367400  | 0.96176400  | 5.66275500  |
| C  | 0.25103300  | 2.48931800  | 6.43651200  |
| C  | 2.28275300  | 0.66196400  | 6.98131100  |

|              |             |             |             |
|--------------|-------------|-------------|-------------|
| H            | 2.47588200  | 0.48086300  | 4.84616000  |
| C            | 0.58704800  | 2.19270900  | 7.76005500  |
| H            | -0.54296000 | 3.20183500  | 6.22595500  |
| C            | 1.60311300  | 1.27719200  | 8.03691400  |
| H            | 3.07748000  | -0.05043600 | 7.18668700  |
| H            | 0.05369200  | 2.67702000  | 8.57355700  |
| H            | 1.86502200  | 1.04463600  | 9.06521000  |
| H            | 0.66045600  | 3.70948500  | 1.37215400  |
| C            | 1.66362000  | 3.72794400  | -2.83674000 |
| C            | 1.04532400  | 3.48283000  | -4.05696100 |
| C            | 0.58374200  | 2.15347400  | -3.94929900 |
| N            | 1.56238500  | 2.59664500  | -2.10137700 |
| H            | 1.74630500  | 2.44604700  | -1.04593900 |
| H            | 2.15868400  | 4.60703300  | -2.44801500 |
| H            | 0.94987500  | 4.15855100  | -4.89505600 |
| H            | 0.04347100  | 1.56036300  | -4.67662200 |
| N            | 0.89327900  | 1.62527200  | -2.75924100 |
| <b>INT8b</b> |             |             |             |
| P            | -1.71813200 | 1.40235700  | -0.32216400 |
| C            | -2.71960700 | 0.15369300  | -1.22101300 |
| C            | -1.77517500 | 2.86869600  | -1.42406400 |
| C            | -2.76832600 | 1.85145900  | 1.10228400  |
| C            | -3.04981500 | -1.06582900 | -0.56133800 |
| C            | -3.08453600 | 0.35174900  | -2.55666000 |
| C            | -2.54287400 | 4.00182700  | -1.13385800 |
| C            | -0.97659200 | 2.86233000  | -2.58104500 |
| C            | -2.14362700 | 2.16152100  | 2.31630100  |
| C            | -4.16670700 | 1.89714600  | 1.00248700  |
| C            | -3.73860700 | -1.99491500 | -1.31920500 |
| C            | -2.74884600 | -1.41219300 | 0.85821800  |
| C            | -3.76256100 | -0.62425700 | -3.30736400 |
| H            | -2.84077000 | 1.28682700  | -3.04301100 |
| C            | -2.51865500 | 5.10689300  | -1.98927900 |
| H            | -3.15748100 | 4.02620100  | -0.24113500 |
| C            | -0.96785000 | 3.95710600  | -3.44178100 |
| H            | -0.35779800 | 1.99545900  | -2.79784000 |
| C            | -2.91469700 | 2.50662400  | 3.42740700  |
| H            | -1.06264000 | 2.09380100  | 2.39529800  |
| C            | -4.93120600 | 2.25671500  | 2.11147900  |
| H            | -4.65264000 | 1.64160800  | 0.06633100  |
| C            | -4.06997200 | -1.79901000 | -2.65762900 |
| O            | -4.15091500 | -3.24006700 | -0.92051900 |
| C            | -3.79229600 | -1.44858300 | 1.76397200  |
| C            | -1.47927100 | -1.84811700 | 1.34973900  |
| H            | -4.02579900 | -0.45997500 | -4.34588800 |

|   |             |             |             |
|---|-------------|-------------|-------------|
| C | -1.73810300 | 5.08612400  | -3.14460600 |
| H | -3.11405400 | 5.98305100  | -1.74929100 |
| H | -0.35189500 | 3.93586000  | -4.33614300 |
| C | -4.30644400 | 2.55661700  | 3.32655000  |
| H | -2.42406800 | 2.72541200  | 4.37123700  |
| H | -6.01387200 | 2.29714500  | 2.02984100  |
| O | -4.69613500 | -2.91188500 | -3.15000400 |
| C | -4.81498700 | -3.82537800 | -2.04803100 |
| C | -3.64513300 | -1.87266600 | 3.08478800  |
| O | -5.10716400 | -1.12878600 | 1.53045500  |
| C | -1.35176000 | -2.29784100 | 2.66588400  |
| P | 0.01510500  | -1.59443100 | 0.31278400  |
| H | -1.72280500 | 5.94533600  | -3.80864600 |
| H | -4.90580000 | 2.82559200  | 4.19181600  |
| H | -4.32735800 | -4.76879000 | -2.30673000 |
| H | -5.87394000 | -3.97439200 | -1.81060200 |
| C | -2.43532700 | -2.32579800 | 3.56253500  |
| O | -4.85516200 | -1.81341900 | 3.72594300  |
| C | -5.73858500 | -1.13869000 | 2.81736500  |
| H | -0.38207500 | -2.61301500 | 3.02758900  |
| C | 1.30847300  | -2.66631600 | 1.05580400  |
| C | -0.40269000 | -2.42019300 | -1.26734700 |
| H | -2.31692800 | -2.67432100 | 4.58194900  |
| H | -6.68124700 | -1.68509100 | 2.75426800  |
| H | -5.88557900 | -0.10598100 | 3.15461600  |
| C | 1.70906700  | -3.88619500 | 0.49064400  |
| C | 1.95934300  | -2.20180900 | 2.21119300  |
| C | -0.11344000 | -1.76454800 | -2.46942700 |
| C | -1.01743100 | -3.68115100 | -1.29970700 |
| C | 2.71703900  | -4.64257700 | 1.09147300  |
| H | 1.24713900  | -4.24766600 | -0.42006400 |
| C | 2.95596200  | -2.96790900 | 2.81383400  |
| C | -0.43653700 | -2.35815600 | -3.69038500 |
| H | 0.34106600  | -0.77798700 | -2.43377700 |
| C | -1.32801400 | -4.27811600 | -2.52002300 |
| H | -1.27118700 | -4.18240100 | -0.37094900 |
| C | 3.33360800  | -4.19374400 | 2.26071600  |
| H | 3.02119800  | -5.58264400 | 0.64027300  |
| H | 3.43860200  | -2.59234200 | 3.71105700  |
| C | -1.04206900 | -3.61548900 | -3.71710200 |
| H | -0.22286700 | -1.83617100 | -4.61854300 |
| H | -1.79735900 | -5.25773100 | -2.53805600 |
| H | 4.11513600  | -4.78725200 | 2.72688500  |
| H | -1.29733100 | -4.07640200 | -4.66682000 |



|    |            |             |             |
|----|------------|-------------|-------------|
| H  | 1.70130300 | -1.23598200 | 2.62109400  |
| C  | 1.40980800 | 2.72610700  | -0.23003900 |
| C  | 2.27133100 | 1.71455500  | -0.73572400 |
| C  | 2.77825600 | 0.69135400  | 0.07842000  |
| Pd | 0.47565600 | 0.73313100  | 0.14983000  |
| C  | 3.53699700 | -0.46489100 | -0.50490200 |
| H  | 3.21357000 | -1.39526300 | -0.03231900 |
| H  | 3.32945600 | -0.56086200 | -1.57851800 |
| C  | 5.06248800 | -0.33071000 | -0.28486500 |
| H  | 5.42706600 | 0.57686600  | -0.78008900 |
| H  | 5.24810700 | -0.20756600 | 0.78963200  |
| C  | 5.79360000 | -1.54555900 | -0.80448500 |
| C  | 5.72887300 | -2.75576100 | -0.09971900 |
| C  | 6.49067300 | -1.51459900 | -2.01762100 |
| C  | 6.34207100 | -3.90534100 | -0.59537100 |
| H  | 5.18492500 | -2.79632300 | 0.83954600  |
| C  | 7.11107600 | -2.66282600 | -2.51625100 |
| H  | 6.54824700 | -0.58273400 | -2.57556900 |
| C  | 7.03728200 | -3.86298000 | -1.80714700 |
| H  | 6.27762200 | -4.83424300 | -0.03475800 |
| H  | 7.65131000 | -2.61876200 | -3.45818700 |
| H  | 7.51817200 | -4.75714300 | -2.19398300 |
| H  | 2.87371800 | 0.85351000  | 1.15606100  |
| C  | 1.57126600 | 3.42489200  | 1.09371100  |
| H  | 0.62263600 | 3.90741000  | 1.35762000  |
| H  | 1.80042400 | 2.71367800  | 1.88422800  |
| C  | 2.68896400 | 4.49276000  | 1.04829000  |
| H  | 3.62965300 | 3.98786400  | 0.78932500  |
| H  | 2.49231700 | 5.22137700  | 0.25170800  |
| C  | 2.83316600 | 5.20577900  | 2.37426900  |
| C  | 2.71085700 | 6.59707000  | 2.46412300  |
| C  | 3.07536800 | 4.47550800  | 3.54911000  |
| C  | 2.83453200 | 7.25172200  | 3.69230000  |
| H  | 2.51735100 | 7.17355900  | 1.56223800  |
| C  | 3.19673400 | 5.12672700  | 4.77614300  |
| H  | 3.14799900 | 3.39156000  | 3.50294000  |
| C  | 3.07909900 | 6.51761400  | 4.85341100  |
| H  | 2.73763700 | 8.33326700  | 3.74016900  |
| H  | 3.38029800 | 4.54521700  | 5.67581700  |
| H  | 3.17389500 | 7.02294400  | 5.81071300  |
| H  | 0.90571700 | 3.31500400  | -0.99222100 |
| H  | 2.32475900 | 1.58162400  | -1.81651600 |
| C  | 0.17272600 | 0.32505400  | 3.88001700  |
| C  | 1.04524500 | 0.11378700  | 4.95452200  |

|            |             |             |             |
|------------|-------------|-------------|-------------|
| C          | 2.28474300  | 0.54122400  | 4.45226600  |
| N          | 0.84569500  | 0.83052100  | 2.82008300  |
| H          | -0.88973700 | 0.13533300  | 3.81434200  |
| H          | 0.81457200  | -0.27210600 | 5.93918000  |
| H          | 3.25170900  | 0.56604300  | 4.94408700  |
| N          | 2.15993400  | 0.96520600  | 3.17783900  |
| <b>TS7</b> |             |             |             |
| P          | -1.37350000 | 1.41381000  | -0.41926900 |
| C          | -2.42233700 | 0.23116500  | -1.38418000 |
| C          | -1.47687100 | 2.97357300  | -1.37619700 |
| C          | -2.40565200 | 1.70497600  | 1.06349600  |
| C          | -2.82041200 | -0.98833900 | -0.75744100 |
| C          | -2.74631800 | 0.45430100  | -2.72584000 |
| C          | -2.07998600 | 4.12910900  | -0.86143600 |
| C          | -0.87705600 | 3.03293600  | -2.64433400 |
| C          | -1.82512700 | 1.63358800  | 2.33464700  |
| C          | -3.77917300 | 1.96251200  | 0.93821000  |
| C          | -3.51983400 | -1.88452400 | -1.54412600 |
| C          | -2.59035800 | -1.32299600 | 0.67388800  |
| C          | -3.43573400 | -0.48918600 | -3.50959900 |
| H          | -2.47421000 | 1.39078400  | -3.19268300 |
| C          | -2.10973200 | 5.30432400  | -1.61393800 |
| H          | -2.51851200 | 4.11415000  | 0.12890700  |
| C          | -0.92999400 | 4.20041800  | -3.40505900 |
| H          | -0.34331300 | 2.16794800  | -3.02784000 |
| C          | -2.61653800 | 1.80774300  | 3.47030400  |
| H          | -0.76562600 | 1.43305700  | 2.43107300  |
| C          | -4.56210300 | 2.15439500  | 2.07518900  |
| H          | -4.23458200 | 2.00418200  | -0.04666300 |
| C          | -3.80353600 | -1.66171000 | -2.88822800 |
| O          | -4.01382800 | -3.10664800 | -1.16447300 |
| C          | -3.67308800 | -1.33848400 | 1.53381600  |
| C          | -1.33007100 | -1.66455000 | 1.24655100  |
| H          | -3.67030500 | -0.29637900 | -4.55027500 |
| C          | -1.54823000 | 5.34124000  | -2.89134100 |
| H          | -2.57429100 | 6.19352400  | -1.19727500 |
| H          | -0.45325500 | 4.23003700  | -4.38014900 |
| C          | -3.98196300 | 2.06915000  | 3.34488200  |
| H          | -2.15872400 | 1.74346700  | 4.45279700  |
| H          | -5.62319000 | 2.36431700  | 1.97119100  |
| O          | -4.47600800 | -2.73677600 | -3.40767300 |
| C          | -4.59929100 | -3.68638600 | -2.33758500 |
| C          | -3.56480400 | -1.61829400 | 2.89349000  |
| O          | -4.98088200 | -1.07469800 | 1.22002500  |
| C          | -1.23727600 | -1.96067600 | 2.61083200  |

|    |             |             |             |
|----|-------------|-------------|-------------|
| P  | 0.18698900  | -1.58924500 | 0.20774500  |
| H  | -1.56650300 | 6.25738900  | -3.47322100 |
| H  | -4.59414600 | 2.20811000  | 4.23168600  |
| H  | -4.05547500 | -4.59863000 | -2.60062100 |
| H  | -5.65824400 | -3.89046600 | -2.15189700 |
| C  | -2.35289100 | -1.93869300 | 3.46547600  |
| O  | -4.79541300 | -1.53235900 | 3.48551900  |
| C  | -5.70511400 | -1.10933600 | 2.45663900  |
| H  | -0.27796200 | -2.22357000 | 3.03649000  |
| C  | 1.39452400  | -2.58598800 | 1.16619800  |
| C  | -0.24783400 | -2.60186700 | -1.25336800 |
| H  | -2.26173100 | -2.16409800 | 4.52167900  |
| H  | -6.52353300 | -1.83019900 | 2.37745500  |
| H  | -6.07104800 | -0.10502800 | 2.69024100  |
| C  | 1.74218900  | -3.90491300 | 0.85179300  |
| C  | 2.05593100  | -1.93761100 | 2.22222400  |
| C  | 0.02319300  | -2.08569300 | -2.52646500 |
| C  | -0.88856500 | -3.84380300 | -1.13309500 |
| C  | 2.72842600  | -4.56641900 | 1.58712100  |
| H  | 1.26980500  | -4.41133600 | 0.01868800  |
| C  | 3.02887100  | -2.60357700 | 2.96357100  |
| C  | -0.33750600 | -2.80230300 | -3.66709600 |
| H  | 0.48497500  | -1.10564100 | -2.60724900 |
| C  | -1.23038900 | -4.56779100 | -2.27434500 |
| H  | -1.14153800 | -4.23066700 | -0.15093000 |
| C  | 3.36953900  | -3.92196400 | 2.64544000  |
| H  | 3.00253000  | -5.58303900 | 1.32136900  |
| H  | 3.53060000  | -2.09011200 | 3.77858500  |
| C  | -0.96081400 | -4.04573300 | -3.54253200 |
| H  | -0.14049900 | -2.38732600 | -4.65109800 |
| H  | -1.71741600 | -5.53364000 | -2.17401300 |
| H  | 4.13872500  | -4.43800400 | 3.21263600  |
| H  | -1.24259300 | -4.60410500 | -4.43045500 |
| H  | 1.81429200  | -0.90290800 | 2.44149200  |
| C  | 2.56429200  | 2.49841300  | -1.21360700 |
| C  | 2.77996800  | 1.17768400  | -1.49536600 |
| C  | 2.95744700  | 0.16932800  | -0.47143400 |
| Pd | 0.86942700  | 0.57834300  | -0.14573700 |
| C  | 2.25133700  | 3.55225500  | -2.21746500 |
| H  | 1.28136900  | 3.98976700  | -1.96136100 |
| H  | 2.15184400  | 3.12591100  | -3.22350300 |
| C  | 3.28117200  | 4.70538500  | -2.24094200 |
| H  | 3.39295200  | 5.09595200  | -1.22177600 |
| H  | 4.26078400  | 4.32376900  | -2.55067800 |

|             |             |             |             |
|-------------|-------------|-------------|-------------|
| C           | 2.82270400  | 5.80264500  | -3.17329900 |
| C           | 1.79369900  | 6.67263700  | -2.78575800 |
| C           | 3.35513100  | 5.92965900  | -4.46140200 |
| C           | 1.31200600  | 7.64488700  | -3.66167500 |
| H           | 1.36157400  | 6.57848300  | -1.79255700 |
| C           | 2.87622300  | 6.90188800  | -5.34283900 |
| H           | 4.15177600  | 5.25945300  | -4.77604300 |
| C           | 1.85172900  | 7.76261800  | -4.94550200 |
| H           | 0.51619900  | 8.31218900  | -3.34175800 |
| H           | 3.30426600  | 6.98660200  | -6.33808500 |
| H           | 1.47814400  | 8.52050300  | -5.62841100 |
| C           | 3.46181600  | -1.18221500 | -0.91239300 |
| H           | 3.26532500  | -1.93195500 | -0.14821300 |
| H           | 2.93543200  | -1.50814100 | -1.81841400 |
| C           | 4.98470400  | -1.19037900 | -1.18427900 |
| H           | 5.50040500  | -0.81241600 | -0.29177000 |
| H           | 5.22089000  | -0.50340300 | -2.00528500 |
| C           | 5.46117400  | -2.58629100 | -1.50744000 |
| C           | 5.56534500  | -3.54580200 | -0.48983000 |
| C           | 5.73826400  | -2.97601700 | -2.82281000 |
| C           | 5.93513900  | -4.85854300 | -0.77891600 |
| H           | 5.34212300  | -3.26096600 | 0.53500500  |
| C           | 6.11289200  | -4.28923100 | -3.11750600 |
| H           | 5.65968800  | -2.24321900 | -3.62266400 |
| C           | 6.21144300  | -5.23551600 | -2.09615900 |
| H           | 6.00938800  | -5.58743100 | 0.02388200  |
| H           | 6.32747100  | -4.57189800 | -4.14465300 |
| H           | 6.50207700  | -6.25739400 | -2.32340900 |
| H           | 3.38235100  | 0.52294300  | 0.46847100  |
| H           | 2.65936700  | 2.82867900  | -0.18373800 |
| H           | 2.69544500  | 0.83723300  | -2.52920100 |
| C           | 0.70371100  | 3.87622000  | 2.70103100  |
| C           | 1.27063000  | 3.01139100  | 3.65239100  |
| C           | 1.66043700  | 1.90690300  | 2.88861500  |
| N           | 0.74746100  | 3.33643000  | 1.46875100  |
| H           | 0.27012700  | 4.85962700  | 2.84956700  |
| H           | 1.39658200  | 3.16755800  | 4.71594800  |
| H           | 2.16845600  | 1.00117200  | 3.19879000  |
| N           | 1.34543900  | 2.11331600  | 1.58739500  |
| <b>INT9</b> |             |             |             |
| P           | -1.59065400 | 1.43565100  | 0.03529100  |
| C           | -2.59516400 | 0.40982300  | -1.12427500 |
| C           | -1.72809800 | 3.11338900  | -0.68825400 |
| C           | -2.57865100 | 1.47779400  | 1.57080700  |
| C           | -2.93944600 | -0.91829000 | -0.73652300 |

|   |             |             |             |
|---|-------------|-------------|-------------|
| C | -2.90241900 | 0.85767100  | -2.41338100 |
| C | -2.56928600 | 4.09816400  | -0.15813200 |
| C | -0.96388900 | 3.40909900  | -1.82653400 |
| C | -1.90560300 | 1.37042800  | 2.79556700  |
| C | -3.97626900 | 1.58766400  | 1.55188500  |
| C | -3.58731000 | -1.68864800 | -1.68315700 |
| C | -2.69550900 | -1.48004700 | 0.61749500  |
| C | -3.53572800 | 0.04018500  | -3.36731000 |
| H | -2.65112500 | 1.87017000  | -2.70014800 |
| C | -2.65028000 | 5.35390300  | -0.76173700 |
| H | -3.15126400 | 3.89353700  | 0.73273200  |
| C | -1.06298700 | 4.65692800  | -2.44205200 |
| H | -0.28540100 | 2.66069100  | -2.22437100 |
| C | -2.62990000 | 1.35595400  | 3.98772500  |
| H | -0.82320100 | 1.29591400  | 2.80764700  |
| C | -4.69385400 | 1.59105800  | 2.74726200  |
| H | -4.50081100 | 1.65297300  | 0.60372700  |
| C | -3.86163800 | -1.23854100 | -2.97162500 |
| O | -4.02744400 | -2.97965000 | -1.54061500 |
| C | -3.77682600 | -1.66132800 | 1.46004200  |
| C | -1.42292300 | -1.87012400 | 1.12851300  |
| H | -3.75850900 | 0.40305200  | -4.36422800 |
| C | -1.90498300 | 5.63502000  | -1.90747700 |
| H | -3.29951300 | 6.11266200  | -0.33401900 |
| H | -0.47464900 | 4.87178600  | -3.32949800 |
| C | -4.02201600 | 1.46464500  | 3.96627900  |
| H | -2.10469300 | 1.26237900  | 4.93372300  |
| H | -5.77585800 | 1.68854800  | 2.72734300  |
| O | -4.47296400 | -2.23119200 | -3.69113400 |
| C | -4.58544200 | -3.35679200 | -2.80637100 |
| C | -3.66055700 | -2.14764100 | 2.75851500  |
| O | -5.09046000 | -1.37716300 | 1.18962600  |
| C | -1.32667700 | -2.38802700 | 2.42541500  |
| P | 0.09891500  | -1.57994500 | 0.12277000  |
| H | -1.97445900 | 6.61076300  | -2.37960900 |
| H | -4.58314300 | 1.45369900  | 4.89638600  |
| H | -4.01709800 | -4.19640400 | -3.21689100 |
| H | -5.64147900 | -3.61344100 | -2.67581500 |
| C | -2.43998800 | -2.52824000 | 3.27140800  |
| O | -4.89029500 | -2.18067200 | 3.35665800  |
| C | -5.82220600 | -1.67787000 | 2.38556700  |
| H | -0.36628400 | -2.70638400 | 2.80531500  |
| C | 1.32966600  | -2.69811000 | 0.89610200  |
| C | -0.29954100 | -2.32766700 | -1.49664300 |

|    |             |             |             |
|----|-------------|-------------|-------------|
| H  | -2.34018900 | -2.92211700 | 4.27623700  |
| H  | -6.57140100 | -2.44571500 | 2.16940800  |
| H  | -6.28297400 | -0.76310600 | 2.76861600  |
| C  | 1.85830500  | -3.81902500 | 0.24619000  |
| C  | 1.87448700  | -2.30780300 | 2.13243500  |
| C  | -0.06989000 | -1.56931800 | -2.65132500 |
| C  | -0.86696700 | -3.60528900 | -1.60753500 |
| C  | 2.91174700  | -4.53503900 | 0.81865200  |
| H  | 1.48257100  | -4.11430800 | -0.72643300 |
| C  | 2.90024100  | -3.04485800 | 2.71896100  |
| C  | -0.40949700 | -2.07909100 | -3.90450400 |
| H  | 0.34387800  | -0.56980000 | -2.55239600 |
| C  | -1.18596800 | -4.12113800 | -2.86248800 |
| H  | -1.07448800 | -4.18501000 | -0.71339200 |
| C  | 3.43004900  | -4.15561800 | 2.05559000  |
| H  | 3.34609300  | -5.37172900 | 0.28112800  |
| H  | 3.31003800  | -2.73113000 | 3.67465000  |
| C  | -0.96523600 | -3.35570200 | -4.01134700 |
| H  | -0.24809500 | -1.47821400 | -4.79447100 |
| H  | -1.61706200 | -5.11497000 | -2.94366500 |
| H  | 4.25816400  | -4.70702800 | 2.48997600  |
| H  | -1.23089500 | -3.75264300 | -4.98676900 |
| H  | 1.52367000  | -1.39674800 | 2.60921000  |
| C  | 2.61048300  | 2.63573600  | -1.46107900 |
| C  | 2.62985300  | 1.28520800  | -1.43301200 |
| C  | 2.78549800  | 0.47253100  | -0.21988800 |
| Pd | 0.69033500  | 0.64628700  | 0.22638100  |
| C  | 2.41500300  | 3.47288600  | -2.68261300 |
| H  | 1.50371100  | 4.06936800  | -2.55733800 |
| H  | 2.26507500  | 2.84196700  | -3.56850700 |
| C  | 3.56979500  | 4.46700000  | -2.94590300 |
| H  | 3.74410500  | 5.04878600  | -2.03168100 |
| H  | 4.49203500  | 3.91296300  | -3.15427400 |
| C  | 3.23786900  | 5.39170500  | -4.09328600 |
| C  | 2.30239300  | 6.42319800  | -3.92025500 |
| C  | 3.79881200  | 5.20693500  | -5.36200000 |
| C  | 1.93864300  | 7.24616500  | -4.98597500 |
| H  | 1.85788000  | 6.58073200  | -2.94004600 |
| C  | 3.43980600  | 6.02994100  | -6.43222100 |
| H  | 4.52402400  | 4.41048700  | -5.51150700 |
| C  | 2.50735300  | 7.05190600  | -6.24785100 |
| H  | 1.21539300  | 8.04235000  | -4.83122200 |
| H  | 3.88938700  | 5.87228400  | -7.40892000 |
| H  | 2.22721900  | 7.69370200  | -7.07841300 |

|              |             |             |             |
|--------------|-------------|-------------|-------------|
| C            | 3.42386300  | -0.88099600 | -0.42857000 |
| H            | 3.43571100  | -1.43309900 | 0.50890600  |
| H            | 2.83677400  | -1.47864300 | -1.13673400 |
| C            | 4.88054200  | -0.83403700 | -0.94913800 |
| H            | 5.48847500  | -0.21143700 | -0.28131500 |
| H            | 4.90533000  | -0.36478200 | -1.94026700 |
| C            | 5.42841100  | -2.23976200 | -1.00259300 |
| C            | 6.20325700  | -2.75208800 | 0.04504900  |
| C            | 5.07062600  | -3.10180300 | -2.04853400 |
| C            | 6.60879800  | -4.08768200 | 0.05234000  |
| H            | 6.48111200  | -2.09794600 | 0.86811900  |
| C            | 5.47077200  | -4.43816500 | -2.04628000 |
| H            | 4.46503000  | -2.72009300 | -2.86765200 |
| C            | 6.24110200  | -4.93751400 | -0.99270600 |
| H            | 7.21132500  | -4.46458000 | 0.87460800  |
| H            | 5.18346200  | -5.08983000 | -2.86729200 |
| H            | 6.55602800  | -5.97737400 | -0.98992800 |
| H            | 3.24328700  | 1.02501800  | 0.60213300  |
| H            | 2.71713700  | 3.17003300  | -0.51800400 |
| H            | 2.49635900  | 0.74056500  | -2.37126200 |
| C            | 0.73828800  | 3.97086700  | 2.80803500  |
| C            | 1.55577600  | 3.12821900  | 3.58275800  |
| C            | 1.81896600  | 2.05615100  | 2.72982300  |
| N            | 0.52149400  | 3.45031600  | 1.58739100  |
| H            | 0.30486200  | 4.92905800  | 3.07236300  |
| H            | 1.91243500  | 3.27836300  | 4.59308000  |
| H            | 2.41306200  | 1.16426200  | 2.88597800  |
| N            | 1.19866700  | 2.27438600  | 1.54190100  |
| <b>INT9'</b> |             |             |             |
| P            | -1.46242800 | 0.81491300  | -0.63054200 |
| C            | -2.68789100 | -0.38661600 | -1.28955400 |
| C            | -0.90156100 | 1.70871200  | -2.12648600 |
| C            | -2.51308600 | 1.97973300  | 0.31140600  |
| C            | -3.44036100 | -1.17185800 | -0.36612200 |
| C            | -2.84183600 | -0.57818300 | -2.66533300 |
| C            | -1.32779200 | 2.99768100  | -2.46509200 |
| C            | 0.04336600  | 1.06132500  | -2.94022500 |
| C            | -2.11400700 | 2.37307800  | 1.59466300  |
| C            | -3.73417100 | 2.44088200  | -0.20268200 |
| C            | -4.29862700 | -2.10251500 | -0.91429600 |
| C            | -3.35723700 | -0.99207300 | 1.10748200  |
| C            | -3.71572600 | -1.54477300 | -3.19446200 |
| H            | -2.27069600 | 0.02696600  | -3.35710600 |
| C            | -0.82508100 | 3.62500200  | -3.60775000 |
| H            | -2.04181500 | 3.51868200  | -1.83728900 |

|   |             |             |             |
|---|-------------|-------------|-------------|
| C | 0.52719200  | 1.68082000  | -4.09027200 |
| H | 0.41307600  | 0.07941500  | -2.65787000 |
| C | -2.91402000 | 3.22922500  | 2.35051200  |
| H | -1.19061000 | 1.98379900  | 2.00470800  |
| C | -4.52692900 | 3.30746100  | 0.54907400  |
| H | -4.06925200 | 2.11081300  | -1.18123100 |
| C | -4.42394800 | -2.30282800 | -2.28811900 |
| O | -5.11136700 | -2.97729900 | -0.24337300 |
| C | -4.38889900 | -0.34681500 | 1.76645800  |
| C | -2.24091200 | -1.37475100 | 1.90496000  |
| H | -3.81770200 | -1.69213400 | -4.26334100 |
| C | 0.09510300  | 2.96754700  | -4.42459600 |
| H | -1.15447700 | 4.62963400  | -3.85638000 |
| H | 1.25529300  | 1.16884000  | -4.71226300 |
| C | -4.11859300 | 3.70227400  | 1.82674400  |
| H | -2.60006800 | 3.51612300  | 3.34975600  |
| H | -5.46788800 | 3.66651200  | 0.14207300  |
| O | -5.31818600 | -3.30848600 | -2.52969200 |
| C | -5.72684900 | -3.80156500 | -1.24316700 |
| C | -4.33793200 | -0.01357600 | 3.11667800  |
| O | -5.56187700 | 0.10501100  | 1.22146500  |
| C | -2.19549800 | -1.01976200 | 3.25995300  |
| P | -0.72445300 | -2.06117200 | 1.12756000  |
| H | 0.48232200  | 3.45742100  | -5.31310600 |
| H | -4.74267400 | 4.36968300  | 2.41395200  |
| H | -5.38128200 | -4.83297600 | -1.12583100 |
| H | -6.81441800 | -3.72886400 | -1.15542900 |
| C | -3.24312100 | -0.32907100 | 3.89362700  |
| O | -5.47790600 | 0.65633300  | 3.47363100  |
| C | -6.26813700 | 0.76913600  | 2.27947900  |
| H | -1.32244600 | -1.28004100 | 3.84751100  |
| C | -0.02477700 | -3.19980100 | 2.38327800  |
| C | -1.28224200 | -3.25375700 | -0.15224200 |
| H | -3.18917900 | -0.05505400 | 4.94094600  |
| H | -7.23389000 | 0.27872500  | 2.43453900  |
| H | -6.38750200 | 1.82591600  | 2.02423600  |
| C | -0.81585700 | -3.87834200 | 3.32492400  |
| C | 1.34794900  | -3.47482100 | 2.31296000  |
| C | -0.78489400 | -3.10953600 | -1.45238100 |
| C | -2.14075800 | -4.32214800 | 0.14403700  |
| C | -0.23837700 | -4.80699500 | 4.18966600  |
| H | -1.87926800 | -3.67489300 | 3.39209800  |
| C | 1.91942800  | -4.40870100 | 3.17843300  |
| C | -1.16036200 | -4.00648700 | -2.45353100 |



|    |             |             |             |
|----|-------------|-------------|-------------|
| H  | -0.11364100 | -2.28538700 | -1.67525300 |
| C  | -2.50964400 | -5.22054500 | -0.85485500 |
| H  | -2.52497000 | -4.44836500 | 1.15074000  |
| C  | 1.13182900  | -5.07316300 | 4.11888800  |
| H  | -0.85866200 | -5.32259500 | 4.91749300  |
| H  | 2.98650700  | -4.60133300 | 3.12078100  |
| C  | -2.02547900 | -5.06040500 | -2.15715600 |
| H  | -0.77999500 | -3.87901500 | -3.46265800 |
| H  | -3.17090000 | -6.04954400 | -0.61774600 |
| H  | 1.58110200  | -5.79408400 | 4.79619700  |
| H  | -2.31915000 | -5.75879100 | -2.93538900 |
| H  | 1.96880500  | -2.96011800 | 1.58914500  |
| C  | 1.18373800  | 2.01794500  | 0.41044400  |
| C  | 2.29553700  | 1.97149900  | -0.55808300 |
| C  | 3.59876500  | 1.79602200  | -0.28380900 |
| Pd | 0.38039600  | 0.02338300  | 0.54268700  |
| C  | 4.67713400  | 1.73651500  | -1.32224600 |
| H  | 5.22004300  | 0.78332000  | -1.24281400 |
| H  | 4.23949900  | 1.76900700  | -2.32852700 |
| C  | 5.70156600  | 2.88804800  | -1.17975600 |
| H  | 5.16990900  | 3.84270800  | -1.27247500 |
| H  | 6.12772700  | 2.85737600  | -0.16886500 |
| C  | 6.80347200  | 2.80381300  | -2.20794900 |
| C  | 7.94255400  | 2.02110500  | -1.97566200 |
| C  | 6.68679000  | 3.45937400  | -3.44070000 |
| C  | 8.93859100  | 1.89778900  | -2.94531000 |
| H  | 8.04743300  | 1.50611700  | -1.02341500 |
| C  | 7.67983200  | 3.34022100  | -4.41446400 |
| H  | 5.80842100  | 4.07078000  | -3.63513800 |
| C  | 8.81056400  | 2.55811100  | -4.16957300 |
| H  | 9.81615400  | 1.28914400  | -2.74409200 |
| H  | 7.57245100  | 3.86061600  | -5.36255000 |
| H  | 9.58631200  | 2.46605600  | -4.92465300 |
| H  | 3.92624500  | 1.67525400  | 0.74723900  |
| C  | 1.51555600  | 2.51262800  | 1.81309400  |
| H  | 0.72107300  | 2.25065500  | 2.52140800  |
| H  | 2.41758700  | 2.03116700  | 2.19405500  |
| C  | 1.69835300  | 4.04675900  | 1.84725200  |
| H  | 2.53692900  | 4.31390500  | 1.19421400  |
| H  | 0.79965900  | 4.52042900  | 1.43116400  |
| C  | 1.93396100  | 4.54399400  | 3.25042600  |
| C  | 3.22423300  | 4.57590200  | 3.79625600  |
| C  | 0.85618700  | 4.91712300  | 4.06518100  |
| C  | 3.43339200  | 4.97225400  | 5.11790900  |

|            |             |             |             |
|------------|-------------|-------------|-------------|
| H          | 4.06946800  | 4.28577100  | 3.17624700  |
| C          | 1.05928400  | 5.31438100  | 5.38761100  |
| H          | -0.15064200 | 4.89660500  | 3.65252200  |
| C          | 2.35070900  | 5.34325900  | 5.91894900  |
| H          | 4.44191700  | 4.99377900  | 5.52221200  |
| H          | 0.21087800  | 5.60408200  | 6.00213200  |
| H          | 2.51249900  | 5.65404700  | 6.94733500  |
| H          | 0.37677500  | 2.63357000  | 0.00276800  |
| H          | 2.00799500  | 2.06029200  | -1.60472400 |
| C          | 2.57264200  | -0.48169600 | 2.75291800  |
| C          | 3.83906300  | -1.06003200 | 2.85315000  |
| C          | 4.12548100  | -1.46232900 | 1.53740600  |
| N          | 2.17143500  | -0.54217200 | 1.46422000  |
| H          | 1.94326200  | -0.03384100 | 3.51031200  |
| H          | 4.44923500  | -1.16814700 | 3.73957800  |
| H          | 5.00637600  | -1.96247500 | 1.15190200  |
| N          | 3.11176200  | -1.15211400 | 0.70425000  |
| <b>TS8</b> |             |             |             |
| P          | -1.75434200 | 1.29744000  | -0.42617500 |
| C          | -2.68552000 | -0.00949400 | -1.32622700 |
| C          | -1.61873000 | 2.65725300  | -1.64826300 |
| C          | -2.98206900 | 1.88167900  | 0.80295200  |
| C          | -3.13906300 | -1.15851500 | -0.61045500 |
| C          | -2.86933800 | 0.06924100  | -2.71041200 |
| C          | -2.31890100 | 3.86314200  | -1.52537900 |
| C          | -0.69855700 | 2.50670700  | -2.69996000 |
| C          | -2.55751200 | 2.16935800  | 2.10644800  |
| C          | -4.33665400 | 2.02426600  | 0.46855500  |
| C          | -3.73078300 | -2.15025200 | -1.36838500 |
| C          | -3.05700100 | -1.34444300 | 0.86646900  |
| C          | -3.46702300 | -0.96291500 | -3.45462000 |
| H          | -2.54040900 | 0.95128800  | -3.24327400 |
| C          | -2.10921000 | 4.89575700  | -2.44306700 |
| H          | -3.02161700 | 4.00223900  | -0.71168400 |
| C          | -0.50107100 | 3.53201100  | -3.62165100 |
| H          | -0.13522400 | 1.58270900  | -2.79194200 |
| C          | -3.47732200 | 2.58862600  | 3.06804200  |
| H          | -1.50965900 | 2.04488300  | 2.36091800  |
| C          | -5.25089600 | 2.46073400  | 1.42654300  |
| H          | -4.67481300 | 1.78344900  | -0.53450200 |
| C          | -3.87584300 | -2.07427600 | -2.75174500 |
| O          | -4.22727400 | -3.34554600 | -0.91770600 |
| C          | -4.21023000 | -1.22054100 | 1.61927500  |
| C          | -1.87321500 | -1.68629000 | 1.58562300  |
| H          | -3.59058800 | -0.88898900 | -4.52886600 |

|   |             |             |             |
|---|-------------|-------------|-------------|
| C | -1.20504100 | 4.73293900  | -3.49255900 |
| H | -2.65505100 | 5.82839600  | -2.33368000 |
| H | 0.20867100  | 3.39869700  | -4.43284600 |
| C | -4.82397100 | 2.73635400  | 2.72926900  |
| H | -3.14167900 | 2.79643100  | 4.07971500  |
| H | -6.29739000 | 2.57763500  | 1.15909000  |
| O | -4.46341200 | -3.21707900 | -3.22112100 |
| C | -4.64044700 | -4.07422500 | -2.08163000 |
| C | -4.23645800 | -1.37010000 | 3.00445300  |
| O | -5.47282500 | -0.94125200 | 1.16197100  |
| C | -1.91223500 | -1.83795000 | 2.97644000  |
| P | -0.25777200 | -1.59948800 | 0.73214000  |
| H | -1.04359800 | 5.53763500  | -4.20370300 |
| H | -5.54043900 | 3.06406000  | 3.47708600  |
| H | -4.01032700 | -4.96143000 | -2.19629600 |
| H | -5.69686700 | -4.34105100 | -1.98822700 |
| C | -3.09841200 | -1.68329000 | 3.71632100  |
| O | -5.51296200 | -1.18460800 | 3.46652400  |
| C | -6.28896100 | -0.77547400 | 2.32965800  |
| H | -0.99614200 | -2.05329100 | 3.51186400  |
| C | 0.89059500  | -2.67202800 | 1.66599800  |
| C | -0.47000200 | -2.54489700 | -0.82903900 |
| H | -3.11319300 | -1.80095600 | 4.79373500  |
| H | -7.17387600 | -1.41079500 | 2.24612300  |
| H | -6.55570400 | 0.28123800  | 2.43585900  |
| C | 0.49916700  | -3.87784700 | 2.26880300  |
| C | 2.24237700  | -2.30411500 | 1.67530300  |
| C | -0.06386700 | -1.94964700 | -2.02847600 |
| C | -0.99089700 | -3.84639800 | -0.84742400 |
| C | 1.44846800  | -4.69931500 | 2.87458100  |
| H | -0.54602700 | -4.16903200 | 2.28056900  |
| C | 3.19024300  | -3.13265100 | 2.27702300  |
| C | -0.19191500 | -2.63805400 | -3.23599600 |
| H | 0.33273400  | -0.93826500 | -2.00693700 |
| C | -1.11101500 | -4.53605600 | -2.05211900 |
| H | -1.31784200 | -4.31430900 | 0.07488000  |
| C | 2.79644300  | -4.32928400 | 2.87672300  |
| H | 1.13609900  | -5.62714900 | 3.34538300  |
| H | 4.23388000  | -2.83223600 | 2.28831100  |
| C | -0.71684700 | -3.93082700 | -3.24969900 |
| H | 0.11250300  | -2.16246900 | -4.16372200 |
| H | -1.51008400 | -5.54666900 | -2.05823800 |
| H | 3.53435100  | -4.96995800 | 3.35124400  |
| H | -0.81893000 | -4.46713000 | -4.18862900 |

|    |            |             |             |
|----|------------|-------------|-------------|
| H  | 2.54233500 | -1.35544400 | 1.24765400  |
| C  | 0.96230900 | 2.73221500  | 0.40440900  |
| C  | 1.95197700 | 2.14584700  | -0.50954600 |
| C  | 3.00210500 | 1.37351700  | -0.12528800 |
| Pd | 0.22553700 | 0.73469300  | 0.63359100  |
| C  | 3.91032300 | 0.66255100  | -1.08161500 |
| H  | 3.89396800 | -0.41689700 | -0.87135600 |
| H  | 3.56437100 | 0.78870100  | -2.11590000 |
| C  | 5.37784300 | 1.14232200  | -0.96922400 |
| H  | 5.42017200 | 2.21080400  | -1.21112500 |
| H  | 5.70104900 | 1.03749400  | 0.07390600  |
| C  | 6.29660100 | 0.36247800  | -1.87827400 |
| C  | 6.81849800 | -0.87367400 | -1.47299800 |
| C  | 6.60100900 | 0.82548200  | -3.16461600 |
| C  | 7.62407200 | -1.62653700 | -2.32791900 |
| H  | 6.59162700 | -1.24513500 | -0.47612400 |
| C  | 7.40718500 | 0.07679500  | -4.02410600 |
| H  | 6.20378400 | 1.78363000  | -3.49188900 |
| C  | 7.92148600 | -1.15292000 | -3.60808200 |
| H  | 8.02301900 | -2.58055700 | -1.99389500 |
| H  | 7.63615000 | 0.45526400  | -5.01675100 |
| H  | 8.55132300 | -1.73593300 | -4.27417200 |
| H  | 3.20844800 | 1.23899400  | 0.93692800  |
| C  | 1.41429000 | 3.39197000  | 1.69076300  |
| H  | 0.54662200 | 3.57344000  | 2.33570800  |
| H  | 2.08682300 | 2.74087700  | 2.24769800  |
| C  | 2.12842400 | 4.73703800  | 1.41973400  |
| H  | 2.97604400 | 4.54705800  | 0.74866600  |
| H  | 1.45136300 | 5.42234000  | 0.89419100  |
| C  | 2.61635100 | 5.37033100  | 2.70007900  |
| C  | 3.69393800 | 4.80520500  | 3.39875600  |
| C  | 1.98590600 | 6.49440300  | 3.24641200  |
| C  | 4.13035800 | 5.35015300  | 4.60544100  |
| H  | 4.18860400 | 3.92635100  | 2.99188600  |
| C  | 2.41968100 | 7.04529200  | 4.45479500  |
| H  | 1.14723000 | 6.94219000  | 2.71795000  |
| C  | 3.49431700 | 6.47490500  | 5.13855200  |
| H  | 4.96739100 | 4.89792200  | 5.13067500  |
| H  | 1.91794500 | 7.91994000  | 4.86048500  |
| H  | 3.83391000 | 6.90144400  | 6.07834600  |
| H  | 0.24074100 | 3.35412100  | -0.12427200 |
| H  | 1.74901400 | 2.24120100  | -1.57622000 |
| C  | 0.45276700 | 0.43861500  | 3.77579100  |
| C  | 1.33616500 | 0.34950600  | 4.85466200  |

|                    |             |             |             |
|--------------------|-------------|-------------|-------------|
| C                  | 2.60028700  | 0.41552200  | 4.24745800  |
| N                  | 1.16143800  | 0.54398200  | 2.62838400  |
| H                  | -0.62815300 | 0.43044200  | 3.75902200  |
| H                  | 1.09709800  | 0.25719000  | 5.90575900  |
| H                  | 3.58151400  | 0.38361700  | 4.70786700  |
| N                  | 2.48712500  | 0.53209700  | 2.91083900  |
| <b>(E)-(S)-TS9</b> |             |             |             |
| P                  | -1.41547900 | 1.17547500  | -1.30096100 |
| C                  | -2.61555300 | -0.16194700 | -1.67364200 |
| C                  | -1.47655600 | 2.27789800  | -2.75744600 |
| C                  | -2.18211600 | 2.08447200  | 0.08245300  |
| C                  | -2.95075700 | -1.08737800 | -0.64037800 |
| C                  | -3.09456000 | -0.35048400 | -2.97296800 |
| C                  | -2.13373000 | 3.51206300  | -2.76474600 |
| C                  | -0.73578200 | 1.88822500  | -3.88749200 |
| C                  | -1.37934400 | 2.43204700  | 1.17737800  |
| C                  | -3.54827500 | 2.40011900  | 0.09619000  |
| C                  | -3.77732100 | -2.13185600 | -1.00860600 |
| C                  | -2.51843000 | -0.97490700 | 0.78233300  |
| C                  | -3.90903600 | -1.44290600 | -3.32259500 |
| H                  | -2.83326300 | 0.36312500  | -3.74453700 |
| C                  | -2.05233100 | 4.34534400  | -3.88256900 |
| H                  | -2.68947200 | 3.83709300  | -1.89298600 |
| C                  | -0.67748800 | 2.70926200  | -5.01095500 |
| H                  | -0.18932200 | 0.94861400  | -3.87078000 |
| C                  | -1.93455800 | 3.09075700  | 2.27394400  |
| H                  | -0.32571100 | 2.16909400  | 1.16880200  |
| C                  | -4.09742100 | 3.07473100  | 1.18582700  |
| H                  | -4.18032100 | 2.10495400  | -0.73572900 |
| C                  | -4.22951900 | -2.32375500 | -2.31282100 |
| O                  | -4.24611400 | -3.13696700 | -0.20461100 |
| C                  | -3.44401700 | -0.57335800 | 1.72714900  |
| C                  | -1.21881200 | -1.30022800 | 1.27989600  |
| H                  | -4.26642800 | -1.58294500 | -4.33623500 |
| C                  | -1.33137400 | 3.94522100  | -5.00671800 |
| H                  | -2.53778800 | 5.31561800  | -3.86283100 |
| H                  | -0.10252700 | 2.39805800  | -5.87807100 |
| C                  | -3.29306300 | 3.41447100  | 2.27776800  |
| H                  | -1.30923800 | 3.34862900  | 3.12313200  |
| H                  | -5.15330000 | 3.32996700  | 1.18598100  |
| O                  | -4.98942700 | -3.45987500 | -2.37810600 |
| C                  | -5.02451400 | -3.99877400 | -1.04722800 |
| C                  | -3.14470600 | -0.43641100 | 3.08151400  |
| O                  | -4.75447300 | -0.24122900 | 1.50869000  |
| C                  | -0.93796400 | -1.18398700 | 2.64444100  |

|    |             |             |             |
|----|-------------|-------------|-------------|
| P  | 0.12340500  | -1.66583200 | 0.08205300  |
| H  | -1.26442900 | 4.59863700  | -5.87126700 |
| H  | -3.72574300 | 3.92974700  | 3.13023100  |
| H  | -4.58074200 | -4.99796600 | -1.05136300 |
| H  | -6.05856300 | -4.01975600 | -0.68924700 |
| C  | -1.89538200 | -0.74249800 | 3.57560200  |
| O  | -4.25025900 | -0.00242700 | 3.75952800  |
| C  | -5.27561000 | 0.19445800  | 2.77241900  |
| H  | 0.04820800  | -1.44130400 | 3.01016400  |
| C  | 1.48118800  | -2.42422800 | 1.04947300  |
| C  | -0.54215200 | -2.99799000 | -0.97001500 |
| H  | -1.66128500 | -0.65301100 | 4.63005700  |
| H  | -6.15006600 | -0.40862400 | 3.03124000  |
| H  | -5.52071400 | 1.25905200  | 2.71437700  |
| C  | 1.82307300  | -3.77906300 | 0.94871000  |
| C  | 2.28151700  | -1.57573500 | 1.83533300  |
| C  | -0.41614500 | -2.88003100 | -2.36014100 |
| C  | -1.20303900 | -4.10772600 | -0.42345000 |
| C  | 2.93603700  | -4.27689600 | 1.63085700  |
| H  | 1.23342600  | -4.44568300 | 0.33032100  |
| C  | 3.38373300  | -2.07690000 | 2.52348900  |
| C  | -0.95253400 | -3.85817900 | -3.19738600 |
| H  | 0.07943000  | -2.00701400 | -2.77548200 |
| C  | -1.72193300 | -5.09256800 | -1.26225200 |
| H  | -1.32603300 | -4.18942600 | 0.65206200  |
| C  | 3.71558900  | -3.43119800 | 2.42031100  |
| H  | 3.19425400  | -5.32770100 | 1.53802000  |
| H  | 3.99064400  | -1.40933600 | 3.12757000  |
| C  | -1.60452600 | -4.96480600 | -2.64929100 |
| H  | -0.86790800 | -3.75332800 | -4.27472000 |
| H  | -2.22430800 | -5.95546700 | -0.83462100 |
| H  | 4.58242500  | -3.82050600 | 2.94574400  |
| H  | -2.02373500 | -5.72551900 | -3.30109600 |
| H  | 2.04471700  | -0.51734500 | 1.89539900  |
| C  | 2.13129200  | 2.36086500  | -1.18557900 |
| C  | 2.63100100  | 1.21630500  | -1.81488700 |
| C  | 2.90349700  | 0.03979600  | -1.06145900 |
| Pd | 0.75449900  | 0.31675900  | -0.97268100 |
| C  | 1.68139400  | 3.60045000  | -1.87839000 |
| H  | 1.05305800  | 3.36593600  | -2.74337600 |
| H  | 2.60076300  | 4.08688900  | -2.24376600 |
| C  | 0.97319500  | 4.56508100  | -0.91532900 |
| H  | 0.04948400  | 4.11273500  | -0.53569700 |
| H  | 1.64746400  | 4.70126300  | -0.06000100 |

|                      |             |             |             |
|----------------------|-------------|-------------|-------------|
| C                    | 0.66165000  | 5.90860800  | -1.52997900 |
| C                    | 1.68500600  | 6.67781800  | -2.10676100 |
| C                    | -0.64076600 | 6.42049200  | -1.52527500 |
| C                    | 1.39930300  | 7.91760800  | -2.67890100 |
| H                    | 2.70403500  | 6.29515700  | -2.08830100 |
| C                    | -0.92831900 | 7.66305700  | -2.09557500 |
| H                    | -1.43648500 | 5.83975600  | -1.06578400 |
| C                    | 0.09211400  | 8.41410700  | -2.68056700 |
| H                    | 2.20170000  | 8.50255600  | -3.12138500 |
| H                    | -1.94711500 | 8.04256600  | -2.08128900 |
| H                    | -0.12636400 | 9.38052100  | -3.12724000 |
| C                    | 3.46314000  | -1.21368200 | -1.67769900 |
| H                    | 3.04915100  | -2.09079400 | -1.16936900 |
| H                    | 3.16927100  | -1.28715600 | -2.73204800 |
| C                    | 5.00440500  | -1.28452500 | -1.56141500 |
| H                    | 5.27820100  | -1.13181400 | -0.50967900 |
| H                    | 5.45243600  | -0.46266200 | -2.13105500 |
| C                    | 5.53087100  | -2.61568800 | -2.04037700 |
| C                    | 5.42425700  | -3.74897500 | -1.22108400 |
| C                    | 6.08125800  | -2.76374800 | -3.31876700 |
| C                    | 5.85717600  | -4.99712300 | -1.66778600 |
| H                    | 4.99874600  | -3.64723400 | -0.22586800 |
| C                    | 6.51758700  | -4.01161500 | -3.76981500 |
| H                    | 6.17224700  | -1.89270900 | -3.96346500 |
| C                    | 6.40632700  | -5.13289500 | -2.94574200 |
| H                    | 5.77017900  | -5.86356200 | -1.01731700 |
| H                    | 6.94701900  | -4.10633600 | -4.76351700 |
| H                    | 6.74730800  | -6.10372900 | -3.29431900 |
| H                    | 3.16994100  | 0.18813400  | -0.01446300 |
| H                    | 2.19525700  | 2.40181700  | -0.10356900 |
| H                    | 2.68116300  | 1.18514300  | -2.90275700 |
| C                    | 5.30946800  | 3.84618200  | 0.38397600  |
| C                    | 6.32745800  | 4.64292200  | -0.15951900 |
| C                    | 5.75065300  | 5.12713500  | -1.34333200 |
| N                    | 4.22059400  | 3.86538200  | -0.41468500 |
| H                    | 5.30830400  | 3.27122900  | 1.30567800  |
| H                    | 7.31591100  | 4.83864400  | 0.23807800  |
| H                    | 6.17970700  | 5.78630500  | -2.09202300 |
| N                    | 4.49534700  | 4.65192100  | -1.48931800 |
| <b>(E)-(S)-INT10</b> |             |             |             |
| P                    | -1.15874800 | 1.20638300  | -1.53858100 |
| C                    | -2.51029200 | -0.00329200 | -1.84966200 |
| C                    | -1.18643400 | 2.31543200  | -3.00249800 |
| C                    | -1.83153400 | 2.19759200  | -0.14708900 |
| C                    | -2.91029600 | -0.87356600 | -0.78886100 |

|   |             |             |             |
|---|-------------|-------------|-------------|
| C | -3.03074500 | -0.17811600 | -3.13533500 |
| C | -1.74683800 | 3.59777700  | -3.02072700 |
| C | -0.48805000 | 1.86303200  | -4.13616300 |
| C | -1.02410100 | 2.37025100  | 0.98579500  |
| C | -3.12765800 | 2.73059100  | -0.15057100 |
| C | -3.83625300 | -1.84501400 | -1.12277900 |
| C | -2.47906200 | -0.77442500 | 0.63961900  |
| C | -3.95011700 | -1.19678200 | -3.44696900 |
| H | -2.71703600 | 0.49089600  | -3.92770100 |
| C | -1.62116000 | 4.40693300  | -4.15239400 |
| H | -2.24915800 | 3.99164000  | -2.14694100 |
| C | -0.38279000 | 2.66172400  | -5.27240100 |
| H | -0.01012800 | 0.88662400  | -4.11219200 |
| C | -1.49872400 | 3.07071300  | 2.09426600  |
| H | -0.03316800 | 1.92390500  | 0.99429400  |
| C | -3.59324300 | 3.45597600  | 0.94620800  |
| H | -3.77678000 | 2.56632200  | -1.00499900 |
| C | -4.33152700 | -2.02192200 | -2.41223700 |
| O | -4.39425300 | -2.77649700 | -0.28326900 |
| C | -3.37584400 | -0.25176700 | 1.55362700  |
| C | -1.24096800 | -1.24503900 | 1.18098600  |
| H | -4.34052400 | -1.32248200 | -4.45053200 |
| C | -0.94746700 | 3.94114100  | -5.28079600 |
| H | -2.03628900 | 5.40897100  | -4.13517300 |
| H | 0.15593300  | 2.29588500  | -6.14196900 |
| C | -2.78163900 | 3.62344100  | 2.07208400  |
| H | -0.87139800 | 3.18344300  | 2.97362100  |
| H | -4.59358100 | 3.87970800  | 0.92805900  |
| O | -5.20903600 | -3.07557400 | -2.43431300 |
| C | -5.23847900 | -3.59935500 | -1.09804300 |
| C | -3.10718500 | -0.13795000 | 2.91554200  |
| O | -4.63190200 | 0.23538500  | 1.29084200  |
| C | -0.99391300 | -1.14767800 | 2.55334500  |
| P | 0.09564000  | -1.74124200 | 0.01519800  |
| H | -0.84806900 | 4.57437800  | -6.15784700 |
| H | -3.15134300 | 4.17577100  | 2.93121100  |
| H | -4.85100700 | -4.62265100 | -1.10288200 |
| H | -6.26264400 | -3.56070400 | -0.71422700 |
| C | -1.92069900 | -0.58708000 | 3.45198200  |
| O | -4.17640800 | 0.43421300  | 3.55583600  |
| C | -5.12998400 | 0.75295300  | 2.53060000  |
| H | -0.05485300 | -1.51454800 | 2.95002800  |
| C | 1.34500000  | -2.64385900 | 1.01915800  |
| C | -0.70767200 | -3.04155800 | -0.99553300 |



|    |             |             |             |
|----|-------------|-------------|-------------|
| H  | -1.71147800 | -0.51686100 | 4.51344300  |
| H  | -6.08701300 | 0.27768000  | 2.76403500  |
| H  | -5.22800100 | 1.84042400  | 2.45435800  |
| C  | 1.58637600  | -4.01983200 | 0.90613300  |
| C  | 2.21038500  | -1.87266600 | 1.81651500  |
| C  | -0.59943600 | -2.95486000 | -2.38942600 |
| C  | -1.45780600 | -4.08063500 | -0.42614400 |
| C  | 2.65758900  | -4.61018700 | 1.58228900  |
| H  | 0.94926300  | -4.63326500 | 0.27961500  |
| C  | 3.26510400  | -2.46454600 | 2.50682300  |
| C  | -1.23593100 | -3.89015700 | -3.20558200 |
| H  | -0.03877400 | -2.13125000 | -2.82292500 |
| C  | -2.07696300 | -5.02679000 | -1.24182700 |
| H  | -1.56881800 | -4.13751100 | 0.65249700  |
| C  | 3.49520000  | -3.83914800 | 2.38837600  |
| H  | 2.83562400  | -5.67651600 | 1.47505500  |
| H  | 3.91865400  | -1.85229100 | 3.12169600  |
| C  | -1.97342500 | -4.92831300 | -2.63253700 |
| H  | -1.16306500 | -3.80449900 | -4.28574600 |
| H  | -2.64696100 | -5.83618900 | -0.79390000 |
| H  | 4.32704900  | -4.30075000 | 2.91244900  |
| H  | -2.47020300 | -5.65698100 | -3.26664900 |
| H  | 2.06373300  | -0.79814500 | 1.87208700  |
| C  | 2.78783000  | 2.74962400  | -0.93682100 |
| C  | 2.74219700  | 1.37332700  | -1.57059300 |
| C  | 3.10610400  | 0.22178000  | -0.85580800 |
| Pd | 0.90680600  | 0.19725500  | -1.03602900 |
| C  | 1.70318500  | 3.70941200  | -1.42862700 |
| H  | 0.74341300  | 3.24244700  | -1.20974600 |
| H  | 1.76292900  | 3.80912500  | -2.51691700 |
| C  | 1.74828300  | 5.09715300  | -0.77007100 |
| H  | 1.79500300  | 4.97389900  | 0.32042300  |
| H  | 2.66126400  | 5.61920900  | -1.07536300 |
| C  | 0.52906200  | 5.91142700  | -1.13556200 |
| C  | 0.54200700  | 6.77385900  | -2.23836400 |
| C  | -0.66211100 | 5.77298000  | -0.41033600 |
| C  | -0.60304800 | 7.48210600  | -2.60748800 |
| H  | 1.45841100  | 6.88843700  | -2.81251400 |
| C  | -1.81074600 | 6.47429100  | -0.77742800 |
| H  | -0.69344000 | 5.10128800  | 0.44200100  |
| C  | -1.78548900 | 7.33363800  | -1.87889400 |
| H  | -0.57194900 | 8.14965300  | -3.46458200 |
| H  | -2.72328100 | 6.34528200  | -0.20185400 |
| H  | -2.67710700 | 7.88522400  | -2.16444600 |

|                  |             |             |             |
|------------------|-------------|-------------|-------------|
| C                | 3.73283000  | -1.01314600 | -1.45741600 |
| H                | 3.28942400  | -1.91112800 | -1.01297100 |
| H                | 3.53296500  | -1.05879300 | -2.53531400 |
| C                | 5.25956900  | -1.07300600 | -1.21437800 |
| H                | 5.44009600  | -0.93975500 | -0.13924300 |
| H                | 5.74720200  | -0.23555600 | -1.72713200 |
| C                | 5.83899900  | -2.39085700 | -1.66747900 |
| C                | 5.63770400  | -3.54673100 | -0.89795300 |
| C                | 6.52571800  | -2.50820800 | -2.88158000 |
| C                | 6.11176900  | -4.78481800 | -1.33027200 |
| H                | 5.10134600  | -3.47186900 | 0.04512000  |
| C                | 7.00388300  | -3.74610700 | -3.31785400 |
| H                | 6.68685200  | -1.62049400 | -3.48887400 |
| C                | 6.79791400  | -4.88920900 | -2.54361800 |
| H                | 5.94698200  | -5.66875300 | -0.71953800 |
| H                | 7.53781600  | -3.81648600 | -4.26183500 |
| H                | 7.16940600  | -5.85283200 | -2.88112400 |
| H                | 3.31226100  | 0.34650400  | 0.20981600  |
| H                | 2.69742700  | 2.64258500  | 0.15039800  |
| H                | 2.83922500  | 1.37426300  | -2.65644400 |
| C                | 5.17880500  | 3.30310500  | -0.29271000 |
| C                | 6.26353700  | 3.84426100  | -0.96365300 |
| C                | 5.75417400  | 4.17317300  | -2.23783600 |
| N                | 4.12497200  | 3.34098200  | -1.14706600 |
| H                | 5.07481300  | 2.90283500  | 0.70543500  |
| H                | 7.26451400  | 3.98818300  | -0.58371400 |
| H                | 6.26859900  | 4.62797900  | -3.07479000 |
| N                | 4.45943700  | 3.85972100  | -2.34957200 |
| <b>(E)-(S)-3</b> |             |             |             |
| C                | -5.44448000 | 0.88536000  | 1.04029500  |
| C                | -6.10934900 | 0.04384000  | 1.91605800  |
| C                | -5.08596400 | -0.72797700 | 2.50631600  |
| N                | -4.12045200 | 0.59678200  | 1.14627300  |
| H                | -5.80611500 | 1.64998000  | 0.36854800  |
| H                | -7.17269000 | 0.00162300  | 2.10172700  |
| H                | -5.17136000 | -1.50758500 | 3.25211100  |
| N                | -3.88070100 | -0.39446600 | 2.03521700  |
| C                | -3.00894200 | 1.15727100  | 0.36473400  |
| C                | -3.13066400 | 0.73596500  | -1.11030500 |
| H                | -4.02699800 | 1.19630300  | -1.54618100 |
| H                | -2.27276500 | 1.14787600  | -1.65442600 |
| C                | -3.19156700 | -0.78882400 | -1.30395000 |
| H                | -2.27674800 | -1.23885100 | -0.89935600 |
| H                | -4.02638000 | -1.19087100 | -0.71996100 |
| C                | -3.35475500 | -1.15704300 | -2.75935000 |

|                    |             |             |             |
|--------------------|-------------|-------------|-------------|
| C                  | -4.63088900 | -1.25068400 | -3.33031900 |
| C                  | -2.23878500 | -1.36284500 | -3.58040100 |
| C                  | -4.78952500 | -1.54216300 | -4.68574900 |
| H                  | -5.50588500 | -1.09664200 | -2.70275300 |
| C                  | -2.39153700 | -1.65559400 | -4.93663300 |
| H                  | -1.24218200 | -1.29628900 | -3.14991800 |
| C                  | -3.66876600 | -1.74551900 | -5.49411500 |
| H                  | -5.78735700 | -1.61525400 | -5.10974800 |
| H                  | -1.51394700 | -1.81699200 | -5.55674800 |
| H                  | -3.78998200 | -1.97609000 | -6.54875500 |
| C                  | -2.93765600 | 2.65388600  | 0.51812100  |
| H                  | -3.78960000 | 3.22051900  | 0.14025500  |
| C                  | -1.89922600 | 3.29925800  | 1.05218500  |
| H                  | -1.04888800 | 2.71992100  | 1.41708900  |
| C                  | -1.78051600 | 4.79068800  | 1.16840600  |
| H                  | -2.71280300 | 5.27201000  | 0.84931500  |
| H                  | -1.62085200 | 5.07130600  | 2.21894500  |
| C                  | -0.60446300 | 5.35112600  | 0.33326200  |
| H                  | 0.32263600  | 4.85545500  | 0.64752300  |
| H                  | -0.76493300 | 5.08962900  | -0.71924600 |
| C                  | -0.46723800 | 6.84760500  | 0.48379200  |
| C                  | 0.28433400  | 7.39548100  | 1.53173200  |
| C                  | -1.13070400 | 7.71952300  | -0.38895300 |
| C                  | 0.37232900  | 8.77750900  | 1.70395300  |
| H                  | 0.80770600  | 6.73096600  | 2.21557000  |
| C                  | -1.04588200 | 9.10267300  | -0.22168500 |
| H                  | -1.71576500 | 7.30866500  | -1.20863600 |
| C                  | -0.29355300 | 9.63649300  | 0.82670200  |
| H                  | 0.96376300  | 9.18367100  | 2.52000500  |
| H                  | -1.56401800 | 9.76301800  | -0.91176200 |
| H                  | -0.22381200 | 10.71268400 | 0.95705600  |
| H                  | -2.11805400 | 0.70059400  | 0.80297800  |
| <b>(E)-(R)-TS9</b> |             |             |             |
| P                  | -1.65745200 | 1.57729700  | 0.13583500  |
| C                  | -2.60033700 | 0.44422200  | -0.95918700 |
| C                  | -1.83673000 | 3.25514200  | -0.57865500 |
| C                  | -2.62664600 | 1.58600200  | 1.68563300  |
| C                  | -2.89271100 | -0.87900300 | -0.50337200 |
| C                  | -2.87812600 | 0.81373200  | -2.27792800 |
| C                  | -2.67725900 | 4.23941600  | -0.04259200 |
| C                  | -0.98674100 | 3.59272300  | -1.64672500 |
| C                  | -1.95451800 | 1.39936400  | 2.89959100  |
| C                  | -4.02198000 | 1.73573000  | 1.68488900  |
| C                  | -3.47417400 | -1.72031400 | -1.43396800 |
| C                  | -2.68275800 | -1.38944600 | 0.88453800  |

|   |             |             |             |
|---|-------------|-------------|-------------|
| C | -3.44307400 | -0.07823600 | -3.20758300 |
| H | -2.65085000 | 1.82140700  | -2.60542100 |
| C | -2.67066400 | 5.53300900  | -0.57002700 |
| H | -3.32455300 | 4.00856000  | 0.79544800  |
| C | -0.99053700 | 4.87979600  | -2.17853500 |
| H | -0.30012800 | 2.84949700  | -2.04291800 |
| C | -2.66482900 | 1.36161000  | 4.09975700  |
| H | -0.87762700 | 1.26513400  | 2.89655500  |
| C | -4.72786300 | 1.71794100  | 2.88645100  |
| H | -4.55353000 | 1.84669300  | 0.74484900  |
| C | -3.72549400 | -1.34777900 | -2.75294800 |
| O | -3.87168200 | -3.01720300 | -1.23743100 |
| C | -3.78518200 | -1.55769900 | 1.70149400  |
| C | -1.42880600 | -1.77980400 | 1.44728000  |
| H | -3.64863400 | 0.22117500  | -4.22886900 |
| C | -1.83207400 | 5.85556800  | -1.63705200 |
| H | -3.31840900 | 6.29021900  | -0.13774700 |
| H | -0.31436300 | 5.12743100  | -2.99068200 |
| C | -4.05096900 | 1.52449900  | 4.09474800  |
| H | -2.13387000 | 1.21331600  | 5.03477000  |
| H | -5.80633500 | 1.84840900  | 2.88068700  |
| O | -4.27875700 | -2.39828800 | -3.43521900 |
| C | -4.34375000 | -3.49116000 | -2.50619000 |
| C | -3.70295500 | -2.02520600 | 3.01193000  |
| O | -5.09048100 | -1.27820600 | 1.39275600  |
| C | -1.36025600 | -2.26894900 | 2.75483100  |
| P | 0.10149000  | -1.45268000 | 0.49579900  |
| H | -1.82093300 | 6.86529800  | -2.03625600 |
| H | -4.60483900 | 1.49808000  | 5.02855900  |
| H | -3.69425500 | -4.29958300 | -2.85456400 |
| H | -5.38123900 | -3.82310400 | -2.40605800 |
| C | -2.49922000 | -2.39642900 | 3.57009600  |
| O | -4.94912400 | -2.04547200 | 3.57702000  |
| C | -5.85498700 | -1.56295600 | 2.57220600  |
| H | -0.40000700 | -2.56015400 | 3.16336500  |
| C | 1.43341600  | -2.36704600 | 1.35901900  |
| C | -0.17149600 | -2.32733500 | -1.08390900 |
| H | -2.43241300 | -2.76893700 | 4.58577500  |
| H | -6.59509300 | -2.33691000 | 2.34705000  |
| H | -6.33023700 | -0.64390000 | 2.92642500  |
| C | 1.96926800  | -3.57198900 | 0.88773900  |
| C | 2.01495000  | -1.75268700 | 2.48171300  |
| C | 0.13748800  | -1.66598600 | -2.28007400 |
| C | -0.72333200 | -3.61580900 | -1.12722800 |

|    |             |             |             |
|----|-------------|-------------|-------------|
| C  | 3.06352600  | -4.15484000 | 1.53141600  |
| H  | 1.54900600  | -4.04833700 | 0.00952200  |
| C  | 3.09603200  | -2.34348400 | 3.13127900  |
| C  | -0.10795500 | -2.28316200 | -3.50641700 |
| H  | 0.54564500  | -0.65999500 | -2.23936700 |
| C  | -0.94820000 | -4.23864700 | -2.35405900 |
| H  | -0.99402200 | -4.12031100 | -0.20481500 |
| C  | 3.62641700  | -3.54619200 | 2.65355000  |
| H  | 3.47855100  | -5.08256900 | 1.14857700  |
| H  | 3.53484100  | -1.85912300 | 3.99855400  |
| C  | -0.64967000 | -3.56985100 | -3.54453800 |
| H  | 0.11848900  | -1.75889200 | -4.42992800 |
| H  | -1.36487700 | -5.24150700 | -2.38133200 |
| H  | 4.47950100  | -3.99958300 | 3.14955700  |
| H  | -0.84070400 | -4.05063000 | -4.49945400 |
| H  | 1.62626000  | -0.79993500 | 2.83104700  |
| C  | 1.72899900  | 3.06862600  | 0.40982700  |
| C  | 2.33839600  | 2.03012500  | -0.31608100 |
| C  | 2.75885700  | 0.80394300  | 0.24432100  |
| Pd | 0.56327100  | 0.81299700  | 0.24199200  |
| C  | 3.51626600  | -0.21728400 | -0.55894800 |
| H  | 3.21961800  | -1.22726000 | -0.25952500 |
| H  | 3.27458200  | -0.11514500 | -1.62399500 |
| C  | 5.04498900  | -0.08583100 | -0.36467100 |
| H  | 5.36798800  | 0.90119700  | -0.71410300 |
| H  | 5.26226600  | -0.13340700 | 0.71059900  |
| C  | 5.78247900  | -1.18690500 | -1.08615100 |
| C  | 5.83360300  | -2.47694400 | -0.53830900 |
| C  | 6.37231800  | -0.96768500 | -2.33661500 |
| C  | 6.45823400  | -3.52006200 | -1.22144400 |
| H  | 5.37583800  | -2.66122700 | 0.43059500  |
| C  | 7.00058600  | -2.00886700 | -3.02379700 |
| H  | 6.33980600  | 0.02818400  | -2.77218200 |
| C  | 7.04504700  | -3.28908100 | -2.46870900 |
| H  | 6.49000500  | -4.51275900 | -0.77975900 |
| H  | 7.45682300  | -1.81879400 | -3.99161800 |
| H  | 7.53466100  | -4.09955200 | -3.00147500 |
| H  | 2.94577200  | 0.76994600  | 1.31808800  |
| C  | 1.67549300  | 3.18619400  | 1.91302900  |
| H  | 1.22717300  | 2.28903600  | 2.36036400  |
| H  | 2.69699700  | 3.24209500  | 2.30554400  |
| C  | 0.87278100  | 4.42489400  | 2.34173400  |
| H  | 1.41015700  | 5.30329200  | 1.96813300  |
| H  | -0.10359100 | 4.40503400  | 1.84245800  |

|                      |             |             |             |
|----------------------|-------------|-------------|-------------|
| C                    | 0.67460200  | 4.48789800  | 3.83541500  |
| C                    | -0.57853100 | 4.22548600  | 4.40207000  |
| C                    | 1.75041500  | 4.76064800  | 4.69269400  |
| C                    | -0.75564600 | 4.22349300  | 5.78717500  |
| H                    | -1.42094300 | 4.01563300  | 3.74986400  |
| C                    | 1.57879400  | 4.76265700  | 6.07721000  |
| H                    | 2.72823300  | 4.97538800  | 4.26785400  |
| C                    | 0.32420100  | 4.49064600  | 6.63041900  |
| H                    | -1.73746500 | 4.01459900  | 6.20412700  |
| H                    | 2.42357600  | 4.97908000  | 6.72569300  |
| H                    | 0.19055100  | 4.49191300  | 7.70867400  |
| H                    | 1.17598500  | 3.79775300  | -0.16273000 |
| H                    | 2.40811200  | 2.16625200  | -1.39239200 |
| C                    | 4.31177500  | 4.46696200  | -1.87825900 |
| C                    | 5.26346900  | 4.08276000  | -0.90613100 |
| N                    | 3.32723600  | 4.73797900  | 0.05476100  |
| H                    | 4.42397800  | 4.49353800  | -2.95833600 |
| H                    | 6.28642200  | 3.76028300  | -1.05585000 |
| C                    | 4.57868500  | 4.27378900  | 0.29378800  |
| H                    | 4.91881900  | 4.10464800  | 1.31080200  |
| N                    | 3.15992500  | 4.84522700  | -1.30448800 |
| <b>(E)-(R)-INT10</b> |             |             |             |
| P                    | -1.50591400 | 1.49870600  | 0.52715900  |
| C                    | -2.58002600 | 0.38146700  | -0.46959600 |
| C                    | -1.88379000 | 3.17445600  | -0.14559800 |
| C                    | -2.29693200 | 1.42171800  | 2.18522800  |
| C                    | -2.85108400 | -0.94824300 | -0.01837700 |
| C                    | -2.97784200 | 0.78094000  | -1.75022700 |
| C                    | -3.11241700 | 3.83956500  | -0.02173300 |
| C                    | -0.84747600 | 3.80062400  | -0.85183000 |
| C                    | -1.47002200 | 1.16764200  | 3.28649400  |
| C                    | -3.67730900 | 1.55137000  | 2.38977800  |
| C                    | -3.54516700 | -1.75413200 | -0.90423100 |
| C                    | -2.49874600 | -1.52264400 | 1.31637100  |
| C                    | -3.65335100 | -0.07606400 | -2.63745800 |
| H                    | -2.75659400 | 1.78972100  | -2.07934300 |
| C                    | -3.29578400 | 5.09848700  | -0.59129000 |
| H                    | -3.92965700 | 3.38478400  | 0.52356400  |
| C                    | -1.02919800 | 5.06084700  | -1.42362800 |
| H                    | 0.10361400  | 3.28474900  | -0.94203500 |
| C                    | -2.00506700 | 1.06404000  | 4.56961800  |
| H                    | -0.40602400 | 1.03197000  | 3.11917900  |
| C                    | -4.21140900 | 1.47930900  | 3.67597300  |
| H                    | -4.34502600 | 1.66482700  | 1.54307400  |
| C                    | -3.92268600 | -1.34761600 | -2.18099800 |

|   |             |             |             |
|---|-------------|-------------|-------------|
| O | -3.94834300 | -3.04994200 | -0.69600900 |
| C | -3.50798300 | -1.72177700 | 2.24000900  |
| C | -1.19947500 | -1.97027300 | 1.71024500  |
| H | -3.94911400 | 0.24952700  | -3.62835200 |
| C | -2.25546000 | 5.71237900  | -1.29379000 |
| H | -4.25215600 | 5.60291300  | -0.48402900 |
| H | -0.21061200 | 5.53315800  | -1.95903900 |
| C | -3.37660500 | 1.23385800  | 4.76941800  |
| H | -1.35321100 | 0.85150100  | 5.41214100  |
| H | -5.28149500 | 1.59811300  | 3.82244200  |
| O | -4.56910100 | -2.37171200 | -2.82518600 |
| C | -4.54697000 | -3.48733900 | -1.92237700 |
| C | -3.29444200 | -2.26878400 | 3.50295500  |
| O | -4.83478900 | -1.40273500 | 2.09480200  |
| C | -1.00163300 | -2.53842600 | 2.97197200  |
| P | 0.22418600  | -1.58806100 | 0.61469800  |
| H | -2.40099800 | 6.69546200  | -1.73276600 |
| H | -3.79568300 | 1.16032900  | 5.76881900  |
| H | -3.94060800 | -4.28910400 | -2.35482200 |
| H | -5.57140400 | -3.81893100 | -1.72804800 |
| C | -2.04630200 | -2.69437800 | 3.90117600  |
| O | -4.47389000 | -2.30336300 | 4.20166400  |
| C | -5.47299100 | -1.75639700 | 3.32806100  |
| H | -0.00925900 | -2.87095700 | 3.25305100  |
| C | 1.61792900  | -2.59499500 | 1.26440200  |
| C | -0.24791700 | -2.40480300 | -0.95710800 |
| H | -1.87762300 | -3.12997900 | 4.87950500  |
| H | -6.24189600 | -2.51182000 | 3.13553600  |
| H | -5.90073300 | -0.85934900 | 3.78547800  |
| C | 2.07563900  | -3.78052400 | 0.67420300  |
| C | 2.34042700  | -2.05423100 | 2.34313600  |
| C | -0.07763900 | -1.69094300 | -2.15074100 |
| C | -0.81084100 | -3.68847200 | -0.99800000 |
| C | 3.22244200  | -4.41545300 | 1.15863600  |
| H | 1.55078400  | -4.20326000 | -0.17488400 |
| C | 3.47276100  | -2.69719000 | 2.83734400  |
| C | -0.46644600 | -2.24959500 | -3.36840500 |
| H | 0.33510800  | -0.68645600 | -2.10773900 |
| C | -1.17953100 | -4.25483600 | -2.21781400 |
| H | -0.97730500 | -4.23417200 | -0.07419200 |
| C | 3.92066200  | -3.88085800 | 2.24181400  |
| H | 3.57105400  | -5.32766400 | 0.68255000  |
| H | 4.01539800  | -2.26810600 | 3.67491400  |
| C | -1.01522100 | -3.53318600 | -3.40375500 |

|    |             |             |             |
|----|-------------|-------------|-------------|
| H  | -0.34764000 | -1.68178500 | -4.28656000 |
| H  | -1.60305000 | -5.25517500 | -2.24273600 |
| H  | 4.81286400  | -4.37551200 | 2.61464900  |
| H  | -1.31822700 | -3.96958100 | -4.35119900 |
| H  | 2.01696600  | -1.11281200 | 2.77959800  |
| C  | 2.46440400  | 3.29420400  | 0.87045100  |
| C  | 2.42998600  | 2.09174400  | -0.04669300 |
| C  | 2.90867400  | 0.81087500  | 0.26513000  |
| Pd | 0.70975000  | 0.70209800  | 0.41592300  |
| C  | 3.47060800  | -0.14747300 | -0.75832400 |
| H  | 3.16258200  | -1.17111600 | -0.52238500 |
| H  | 3.07415100  | 0.08052100  | -1.75566500 |
| C  | 5.01687100  | -0.12181700 | -0.80358800 |
| H  | 5.35862700  | 0.85307700  | -1.17124800 |
| H  | 5.39265100  | -0.22817400 | 0.22322700  |
| C  | 5.56156900  | -1.23812200 | -1.66083200 |
| C  | 5.55142000  | -2.55608900 | -1.17973500 |
| C  | 6.02400800  | -1.00553700 | -2.96106300 |
| C  | 5.99174500  | -3.61175300 | -1.97691400 |
| H  | 5.18957500  | -2.75345200 | -0.17366000 |
| C  | 6.46835200  | -2.05994800 | -3.76278400 |
| H  | 6.03634100  | 0.01094400  | -3.34773500 |
| C  | 6.45312100  | -3.36716200 | -3.27349000 |
| H  | 5.97620200  | -4.62581900 | -1.58581400 |
| H  | 6.82671700  | -1.85908700 | -4.76890500 |
| H  | 6.79820400  | -4.18827900 | -3.89564900 |
| H  | 3.25576600  | 0.62383100  | 1.28222800  |
| C  | 2.44299600  | 2.97928900  | 2.37322400  |
| H  | 1.64972600  | 2.24439700  | 2.55015700  |
| H  | 3.39120900  | 2.51019900  | 2.66220400  |
| C  | 2.19322000  | 4.22463600  | 3.24726300  |
| H  | 2.35685200  | 3.94825100  | 4.29583400  |
| H  | 2.92999900  | 4.99643800  | 2.99902800  |
| C  | 0.79075000  | 4.76461600  | 3.07670400  |
| C  | 0.51015200  | 5.78873600  | 2.16208300  |
| C  | -0.27230700 | 4.19180200  | 3.78638600  |
| C  | -0.80219400 | 6.21871900  | 1.95833600  |
| H  | 1.32575200  | 6.22413200  | 1.59136300  |
| C  | -1.58558000 | 4.61415800  | 3.58162300  |
| H  | -0.06976300 | 3.39487600  | 4.49668800  |
| C  | -1.85360300 | 5.63090100  | 2.66346600  |
| H  | -1.00632900 | 6.99909800  | 1.23169100  |
| H  | -2.39567600 | 4.13561900  | 4.12439500  |
| H  | -2.87517100 | 5.95445900  | 2.48835600  |



|                  |             |             |             |
|------------------|-------------|-------------|-------------|
| H                | 1.61798700  | 3.94107100  | 0.63617600  |
| H                | 2.37521700  | 2.35969100  | -1.10319500 |
| C                | 4.72314500  | 5.91162600  | 0.08568000  |
| C                | 5.68429700  | 4.88791600  | 0.22182900  |
| N                | 3.63882300  | 4.13493500  | 0.55186600  |
| H                | 4.87492700  | 6.95642500  | -0.15315000 |
| H                | 6.75667100  | 4.95658500  | 0.10970000  |
| C                | 4.94263600  | 3.75710000  | 0.52315500  |
| H                | 5.23180400  | 2.73245300  | 0.70259100  |
| N                | 3.48320200  | 5.45291300  | 0.28622600  |
| <b>(E)-(R)-3</b> |             |             |             |
| C                | -1.22932100 | -0.27223000 | 1.62917200  |
| C                | 0.09636600  | -0.66486000 | 1.57471200  |
| C                | 0.54187900  | -0.21464600 | 0.31291700  |
| N                | -1.50474800 | 0.35739000  | 0.45701300  |
| H                | -1.98517800 | -0.38760900 | 2.39252400  |
| H                | 0.65175800  | -1.20325400 | 2.32855200  |
| H                | 1.52084700  | -0.32165700 | -0.13617200 |
| N                | -0.42727900 | 0.40993400  | -0.36132800 |
| C                | -2.75755500 | 1.01498100  | 0.08429600  |
| H                | -3.52691400 | 0.55018400  | 0.71531700  |
| C                | -3.09992600 | 0.72326100  | -1.38606000 |
| H                | -4.02223200 | 1.26006100  | -1.63729300 |
| H                | -2.30440600 | 1.13579400  | -2.01290900 |
| C                | -3.27364200 | -0.77558400 | -1.68172800 |
| H                | -2.37785500 | -1.30634400 | -1.34191600 |
| H                | -4.12046200 | -1.16594100 | -1.10324200 |
| C                | -3.48801300 | -1.03062100 | -3.15453800 |
| C                | -4.77344700 | -1.18417700 | -3.68725500 |
| C                | -2.39177600 | -1.06977200 | -4.02747900 |
| C                | -4.96230100 | -1.37545700 | -5.05764700 |
| H                | -5.63286000 | -1.15695500 | -3.02114800 |
| C                | -2.57504800 | -1.25995700 | -5.39705900 |
| H                | -1.38917800 | -0.94967000 | -3.62331900 |
| C                | -3.86289400 | -1.41384600 | -5.91712400 |
| H                | -5.96726500 | -1.49708900 | -5.45278300 |
| H                | -1.71342400 | -1.29151000 | -6.05840100 |
| H                | -4.00743200 | -1.56493300 | -6.98318400 |
| C                | -2.73126600 | 2.49918000  | 0.36580300  |
| H                | -3.68396500 | 3.00315100  | 0.20024100  |
| C                | -1.67124400 | 3.20093900  | 0.76881200  |
| H                | -0.72020800 | 2.69035900  | 0.91339800  |
| C                | -1.67091000 | 4.68401700  | 1.00094400  |
| H                | -2.68848600 | 5.08515400  | 0.91951200  |
| H                | -1.32239600 | 4.90488700  | 2.01975300  |

|              |             |             |             |
|--------------|-------------|-------------|-------------|
| C            | -0.75000400 | 5.42749700  | 0.00392600  |
| H            | 0.26070600  | 5.00634200  | 0.07027000  |
| H            | -1.10900700 | 5.23355600  | -1.01370700 |
| C            | -0.71065200 | 6.91326500  | 0.27084600  |
| C            | 0.24678900  | 7.46296300  | 1.13330300  |
| C            | -1.66572900 | 7.76702700  | -0.29675600 |
| C            | 0.25252700  | 8.82880100  | 1.42097300  |
| H            | 0.99624400  | 6.81327900  | 1.57968200  |
| C            | -1.66505200 | 9.13332700  | -0.01250100 |
| H            | -2.41358500 | 7.35480300  | -0.97041000 |
| C            | -0.70473400 | 9.66916700  | 0.84861600  |
| H            | 1.00641300  | 9.23703400  | 2.08868100  |
| H            | -2.41132400 | 9.77996300  | -0.46610400 |
| H            | -0.70031500 | 10.73295500 | 1.06876000  |
| <b>INT8c</b> |             |             |             |
| P            | -3.16717300 | 0.23070800  | -1.03889900 |
| C            | -4.27409400 | -1.20080000 | -1.35990500 |
| C            | -3.17986400 | 1.17888600  | -2.60848900 |
| C            | -4.13521800 | 1.27784300  | 0.10660800  |
| C            | -4.50978000 | -2.12291000 | -0.29897000 |
| C            | -4.79636500 | -1.45249900 | -2.63280000 |
| C            | -3.61117700 | 2.51020300  | -2.66681600 |
| C            | -2.57132800 | 0.61219700  | -3.74281400 |
| C            | -3.43229200 | 2.11469700  | 0.98371900  |
| C            | -5.53711100 | 1.28397700  | 0.11040600  |
| C            | -5.25075400 | -3.24526000 | -0.62089500 |
| C            | -4.08209200 | -1.96144500 | 1.12147000  |
| C            | -5.53378400 | -2.61188400 | -2.93335600 |
| H            | -4.63150300 | -0.73562900 | -3.42628300 |
| C            | -3.41921500 | 3.26639400  | -3.82541400 |
| H            | -4.06870800 | 2.96829300  | -1.79704700 |
| C            | -2.41346900 | 1.35685400  | -4.90950500 |
| H            | -2.20597300 | -0.40986600 | -3.70021200 |
| C            | -4.12811100 | 2.94723700  | 1.86158600  |
| H            | -2.34759400 | 2.07641400  | 0.99968800  |
| C            | -6.22828700 | 2.11888000  | 0.98797500  |
| H            | -6.08230000 | 0.63058100  | -0.56270500 |
| C            | -5.73467900 | -3.50179100 | -1.90147200 |
| O            | -5.61238700 | -4.26524400 | 0.22115600  |
| C            | -5.03002900 | -1.60248300 | 2.05985500  |
| C            | -2.79215800 | -2.30299700 | 1.63355300  |
| H            | -5.92396000 | -2.79371000 | -3.92824900 |
| C            | -2.82344900 | 2.69353900  | -4.94796100 |
| H            | -3.71387000 | 4.31092200  | -3.84159800 |
| H            | -1.94574700 | 0.90358800  | -5.77905700 |

|    |             |             |             |
|----|-------------|-------------|-------------|
| C  | -5.52470600 | 2.94984000  | 1.86584200  |
| H  | -3.57741400 | 3.58208300  | 2.54965600  |
| H  | -7.31490500 | 2.12153900  | 0.98728500  |
| O  | -6.40703000 | -4.69452300 | -1.91512700 |
| C  | -6.29181400 | -5.23381400 | -0.58846700 |
| C  | -4.77468900 | -1.57138400 | 3.43223100  |
| O  | -6.34491500 | -1.27832600 | 1.83382700  |
| C  | -2.56206900 | -2.30952900 | 3.01091900  |
| P  | -1.41454300 | -2.50247700 | 0.43877200  |
| H  | -2.66376400 | 3.28914000  | -5.84115700 |
| H  | -6.06555700 | 3.59563400  | 2.55204500  |
| H  | -5.70117000 | -6.15433400 | -0.62354200 |
| H  | -7.29079200 | -5.41187900 | -0.18045700 |
| C  | -3.55290800 | -1.95036800 | 3.94327200  |
| O  | -5.90954000 | -1.19762900 | 4.10266500  |
| C  | -6.83049600 | -0.77449400 | 3.08439600  |
| H  | -1.58270100 | -2.57489700 | 3.38554700  |
| C  | 0.01397000  | -3.14994200 | 1.38245000  |
| C  | -1.96241100 | -3.87809300 | -0.63299000 |
| H  | -3.35571300 | -1.95669800 | 5.00896600  |
| H  | -7.81526900 | -1.19744800 | 3.28795300  |
| H  | -6.85373300 | 0.32152000  | 3.04676400  |
| C  | 0.62562800  | -4.36559600 | 1.04195200  |
| C  | 0.62888300  | -2.31870800 | 2.33661700  |
| C  | -1.93604900 | -3.70519400 | -2.02159900 |
| C  | -2.45411600 | -5.07462900 | -0.09158500 |
| C  | 1.82905800  | -4.74065600 | 1.64392600  |
| H  | 0.17771600  | -5.01335500 | 0.29664300  |
| C  | 1.82223000  | -2.70597600 | 2.94183900  |
| C  | -2.40784600 | -4.71254800 | -2.86339600 |
| H  | -1.57232900 | -2.76438200 | -2.42496200 |
| C  | -2.90701000 | -6.08797300 | -0.93497500 |
| H  | -2.48961000 | -5.20550600 | 0.98569900  |
| C  | 2.43179800  | -3.91233100 | 2.59238300  |
| H  | 2.29757300  | -5.67961300 | 1.36241600  |
| H  | 2.29647300  | -2.03728000 | 3.65276600  |
| C  | -2.89356400 | -5.90404500 | -2.32116600 |
| H  | -2.40392600 | -4.56493400 | -3.93925500 |
| H  | -3.27660700 | -7.01801200 | -0.51217200 |
| H  | 3.38062600  | -4.19218900 | 3.04000300  |
| H  | -3.26290100 | -6.68813800 | -2.97570000 |
| H  | 0.20485500  | -1.35079800 | 2.57019400  |
| Pd | -0.90913700 | -0.45743400 | -0.55950900 |
| C  | 0.65030900  | 0.12529900  | -2.04506700 |

|   |             |             |             |
|---|-------------|-------------|-------------|
| C | 0.37103100  | 1.29548200  | -1.32521400 |
| C | 1.10441500  | -1.05329000 | -1.39089100 |
| H | 1.06727500  | -1.95658600 | -1.99978500 |
| C | -0.26200100 | 2.49951100  | -1.95025800 |
| H | -1.05423700 | 2.87118600  | -1.29127500 |
| H | -0.73622600 | 2.23184300  | -2.89569500 |
| C | 0.71558500  | 3.66922900  | -2.21367200 |
| H | 1.13953500  | 4.01688500  | -1.26385800 |
| H | 1.54832700  | 3.31957700  | -2.83517600 |
| C | -0.03177200 | 4.78051300  | -2.91267500 |
| C | -0.86771000 | 5.64033600  | -2.18769500 |
| C | 0.00162100  | 4.90112500  | -4.30689200 |
| C | -1.65528000 | 6.59015400  | -2.83882400 |
| H | -0.90610300 | 5.55685500  | -1.10392100 |
| C | -0.78147200 | 5.85167200  | -4.96389100 |
| H | 0.64016100  | 4.23520900  | -4.88252300 |
| C | -1.61704600 | 6.69734900  | -4.23161600 |
| H | -2.29724700 | 7.24828600  | -2.25945600 |
| H | -0.73973400 | 5.93093700  | -6.04698500 |
| H | -2.22812700 | 7.43787100  | -4.74008800 |
| C | 2.08055500  | -1.10188800 | -0.24588300 |
| H | 2.09396700  | -2.11951400 | 0.14686600  |
| H | 1.76104600  | -0.44637600 | 0.56744600  |
| C | 3.53286400  | -0.72006600 | -0.61690900 |
| H | 3.89258900  | -1.33135100 | -1.45397000 |
| H | 3.55536900  | 0.32720300  | -0.94357900 |
| C | 4.40580300  | -0.92486200 | 0.59940400  |
| C | 4.24981200  | -0.09196600 | 1.71763400  |
| C | 5.29390800  | -2.00224000 | 0.68553500  |
| C | 4.96445900  | -0.33314800 | 2.89014300  |
| H | 3.53720300  | 0.72672200  | 1.67165800  |
| C | 6.01334600  | -2.24673700 | 1.85817200  |
| H | 5.41502000  | -2.66200300 | -0.17064500 |
| C | 5.84924900  | -1.41330800 | 2.96582000  |
| H | 4.82714500  | 0.31933000  | 3.74851400  |
| H | 6.69929900  | -3.08851700 | 1.90594500  |
| H | 6.40520200  | -1.60238800 | 3.88007200  |
| H | 0.83130800  | 1.43529300  | -0.34582800 |
| C | 0.97281500  | 1.27441000  | 3.17470500  |
| C | -0.22380600 | 0.98328100  | 3.85171700  |
| C | -1.10703600 | 0.65255100  | 2.81780100  |
| N | 0.81494400  | 1.12924300  | 1.84390000  |
| H | 0.28407000  | 0.05060200  | -3.06801800 |
| H | 1.92953100  | 1.58470000  | 3.58182900  |

|             |             |             |             |
|-------------|-------------|-------------|-------------|
| H           | -0.42112700 | 1.01665900  | 4.91548400  |
| H           | -2.14811000 | 0.36564900  | 2.86623400  |
| N           | -0.47553100 | 0.74077200  | 1.62334600  |
| (Z)-(S)-TS9 |             |             |             |
| C           | 0.42698200  | -2.59605400 | 0.02068300  |
| C           | -0.60944200 | -1.93430300 | -0.65940700 |
| C           | -1.49138000 | -1.02130000 | -0.00071100 |
| Pd          | 0.46587200  | -0.04695400 | -0.15061400 |
| H           | 0.59576300  | -2.37821000 | 1.06780900  |
| C           | -1.96477800 | -1.19977800 | 1.41638700  |
| H           | -2.29948000 | -0.23687400 | 1.80819800  |
| H           | -1.15686000 | -1.55114000 | 2.06142600  |
| C           | -3.13207400 | -2.20785300 | 1.54502700  |
| H           | -3.94869900 | -1.91769200 | 0.87125000  |
| H           | -2.76903200 | -3.19489100 | 1.24269600  |
| C           | -3.61406100 | -2.22997700 | 2.97519600  |
| C           | -2.91397800 | -2.96783500 | 3.94059100  |
| C           | -4.69640900 | -1.44264100 | 3.38564700  |
| C           | -3.28659500 | -2.90937900 | 5.28395600  |
| H           | -2.06833400 | -3.57768400 | 3.63746300  |
| C           | -5.07419600 | -1.38575900 | 4.72880400  |
| H           | -5.24350900 | -0.86221700 | 2.64563400  |
| C           | -4.36622500 | -2.11700700 | 5.68510700  |
| H           | -2.73288800 | -3.48869300 | 6.01862100  |
| H           | -5.91942700 | -0.77084900 | 5.02782500  |
| H           | -4.65748500 | -2.07581500 | 6.73142400  |
| C           | 1.48557100  | -3.39318200 | -0.68850600 |
| H           | 1.68263000  | -2.95864300 | -1.67363700 |
| H           | 1.09578000  | -4.40220000 | -0.85538600 |
| C           | 2.77667900  | -3.45227300 | 0.14120200  |
| H           | 3.00094200  | -2.44498400 | 0.50535000  |
| H           | 2.57554300  | -4.05322900 | 1.03719700  |
| C           | 3.99288400  | -3.96257400 | -0.59543100 |
| C           | 3.91271300  | -4.97852400 | -1.55570600 |
| C           | 5.24929300  | -3.39855100 | -0.33018700 |
| C           | 5.05134500  | -5.41385100 | -2.23612800 |
| H           | 2.95132700  | -5.42968200 | -1.78300200 |
| C           | 6.39014100  | -3.82900500 | -1.00733500 |
| H           | 5.32711200  | -2.60068500 | 0.40407200  |
| C           | 6.29535400  | -4.83920600 | -1.96782200 |
| H           | 4.96505200  | -6.20081000 | -2.98073800 |
| H           | 7.35148100  | -3.37109900 | -0.78908800 |
| H           | 7.18103500  | -5.17598700 | -2.49958400 |
| P           | 2.59938300  | 0.37222200  | -1.07086500 |
| C           | 2.53389100  | 2.07700400  | -1.76107700 |

|   |            |             |             |
|---|------------|-------------|-------------|
| C | 2.93727500 | -0.70862000 | -2.51064900 |
| C | 4.10987800 | 0.34795700  | -0.04587400 |
| C | 2.53694000 | 3.17772300  | -0.85247100 |
| C | 2.31444800 | 2.29309700  | -3.12449400 |
| C | 1.85754600 | -0.98699200 | -3.36917100 |
| C | 4.16252900 | -1.34588000 | -2.73424300 |
| C | 4.00277000 | -0.10601200 | 1.27529900  |
| C | 5.35043000 | 0.79005200  | -0.52689800 |
| C | 2.33321900 | 4.42671400  | -1.40806800 |
| C | 2.79680600 | 3.07589600  | 0.61120600  |
| C | 2.08164000 | 3.57550900  | -3.65565100 |
| H | 2.32042000 | 1.45081800  | -3.80512500 |
| C | 2.01338900 | -1.85952800 | -4.44347100 |
| H | 0.89100400 | -0.52854400 | -3.17780000 |
| C | 4.31024200 | -2.23863300 | -3.79778300 |
| H | 4.99681500 | -1.18024600 | -2.06591900 |
| C | 5.12494500 | -0.13394300 | 2.10300200  |
| H | 3.03307400 | -0.41514600 | 1.65343900  |
| C | 6.47561700 | 0.74295000  | 0.29520700  |
| H | 5.43247400 | 1.17546700  | -1.53850800 |
| C | 2.09044300 | 4.62705300  | -2.76538000 |
| O | 2.31942900 | 5.63050700  | -0.75391000 |
| C | 4.03022700 | 3.46652400  | 1.09607800  |
| C | 1.84253400 | 2.65274700  | 1.58522600  |
| H | 1.90874300 | 3.72706400  | -4.71501100 |
| C | 3.24209900 | -2.49269800 | -4.65639000 |
| H | 1.17251400 | -2.06149000 | -5.10067200 |
| H | 5.25636300 | -2.75219400 | -3.93149700 |
| C | 6.36373800 | 0.28331700  | 1.61103800  |
| H | 5.03131700 | -0.47722600 | 3.12862700  |
| H | 7.43835600 | 1.06919000  | -0.08798300 |
| O | 1.90113200 | 5.96047900  | -3.01138300 |
| C | 1.99062900 | 6.62035900  | -1.73823100 |
| C | 4.36641300 | 3.42941500  | 2.44774500  |
| O | 5.09822900 | 3.92282600  | 0.36766400  |
| C | 2.18304600 | 2.64796400  | 2.94125300  |
| P | 0.23236100 | 1.97789700  | 1.00396600  |
| H | 3.35800300 | -3.19172800 | -5.47948700 |
| H | 7.23959100 | 0.25712800  | 2.25258300  |
| H | 1.02159300 | 7.06530700  | -1.49311600 |
| H | 2.78322100 | 7.37319400  | -1.77422600 |
| C | 3.45570500 | 3.03229200  | 3.40198300  |
| O | 5.65700700 | 3.85180500  | 2.61722700  |
| C | 6.17599600 | 4.09048400  | 1.29891300  |

|                      |             |             |             |
|----------------------|-------------|-------------|-------------|
| H                    | 1.44885300  | 2.33874900  | 3.67361800  |
| C                    | -0.76507000 | 1.76533800  | 2.52057600  |
| C                    | -0.49967000 | 3.36791400  | 0.07298800  |
| H                    | 3.70451800  | 3.01580500  | 4.45681000  |
| H                    | 6.55351400  | 5.11454700  | 1.23703200  |
| H                    | 6.95821800  | 3.35674900  | 1.08131800  |
| C                    | -1.95402900 | 2.46881700  | 2.75146100  |
| C                    | -0.40283500 | 0.72859500  | 3.39940500  |
| C                    | -1.00237500 | 3.11785700  | -1.21075000 |
| C                    | -0.51191500 | 4.67539000  | 0.57919700  |
| C                    | -2.76634900 | 2.13488000  | 3.83847900  |
| H                    | -2.25755900 | 3.26218200  | 2.07688200  |
| C                    | -1.20794500 | 0.40843300  | 4.48877400  |
| C                    | -1.50764600 | 4.16321800  | -1.98349800 |
| H                    | -0.96631200 | 2.10556900  | -1.60389800 |
| C                    | -1.03435700 | 5.71622800  | -0.18752200 |
| H                    | -0.10328800 | 4.87794700  | 1.56457200  |
| C                    | -2.39845800 | 1.10622200  | 4.70607400  |
| H                    | -3.69473300 | 2.67578900  | 3.99835700  |
| H                    | -0.93278900 | -0.41492800 | 5.13982500  |
| C                    | -1.52559900 | 5.46258500  | -1.47180500 |
| H                    | -1.87956300 | 3.96563200  | -2.98438600 |
| H                    | -1.04907900 | 6.72628900  | 0.21202900  |
| H                    | -3.04733200 | 0.82526300  | 5.52875100  |
| H                    | -1.91882600 | 6.27743700  | -2.07277300 |
| H                    | 0.49004500  | 0.14145500  | 3.20267800  |
| H                    | -0.69910100 | -2.08749000 | -1.73372600 |
| H                    | -2.21672600 | -0.53028600 | -0.65154400 |
| C                    | 0.07713600  | -4.89339700 | 3.49560900  |
| C                    | -0.68054800 | -5.93602700 | 2.93889900  |
| C                    | -0.90546200 | -5.50584500 | 1.62427800  |
| N                    | 0.28410800  | -3.91532500 | 2.58738600  |
| H                    | 0.47704600  | -4.80225200 | 4.50038100  |
| H                    | -1.01447500 | -6.85213100 | 3.40959000  |
| H                    | -1.44731500 | -5.99245100 | 0.82064000  |
| N                    | -0.32571100 | -4.30061500 | 1.43694500  |
| <b>(Z)-(S)-INT10</b> |             |             |             |
| C                    | 0.61936100  | -2.99376400 | 0.51952000  |
| C                    | -0.34228800 | -2.14524000 | -0.29481500 |
| C                    | -1.43817500 | -1.46761500 | 0.26374300  |
| Pd                   | 0.23298100  | -0.00746600 | -0.11185400 |
| H                    | 0.89613400  | -2.48126200 | 1.44306100  |
| C                    | -1.82714300 | -1.48846100 | 1.71822000  |
| H                    | -2.24842400 | -0.51716000 | 1.98894200  |
| H                    | -0.94266300 | -1.61915100 | 2.34937600  |

|   |             |             |             |
|---|-------------|-------------|-------------|
| C | -2.85592100 | -2.57109200 | 2.12533700  |
| H | -3.77177400 | -2.44809600 | 1.53378700  |
| H | -2.45467300 | -3.56601600 | 1.91068500  |
| C | -3.15500800 | -2.41756700 | 3.59771500  |
| C | -2.24689300 | -2.90031300 | 4.55189400  |
| C | -4.26570300 | -1.68955400 | 4.04003100  |
| C | -2.44576000 | -2.65808100 | 5.91158700  |
| H | -1.37603500 | -3.45608600 | 4.21299800  |
| C | -4.46955600 | -1.44591000 | 5.39973200  |
| H | -4.97085500 | -1.29999500 | 3.30929500  |
| C | -3.55790300 | -1.92758400 | 6.34128900  |
| H | -1.73313600 | -3.04039200 | 6.63799600  |
| H | -5.33826200 | -0.87823300 | 5.72288600  |
| H | -3.71347100 | -1.73935600 | 7.40009700  |
| C | 1.89057600  | -3.32301900 | -0.26874700 |
| H | 2.33024400  | -2.37873500 | -0.58678200 |
| H | 1.62380000  | -3.85907400 | -1.18905800 |
| C | 2.94674300  | -4.12181400 | 0.50900800  |
| H | 3.14113000  | -3.62291200 | 1.46611200  |
| H | 2.56278900  | -5.12132100 | 0.74289000  |
| C | 4.22584300  | -4.21314100 | -0.29138100 |
| C | 4.38259500  | -5.18594500 | -1.28699800 |
| C | 5.24889200  | -3.27384400 | -0.10973300 |
| C | 5.52829800  | -5.21860500 | -2.08324400 |
| H | 3.59656300  | -5.92197000 | -1.44036600 |
| C | 6.39548700  | -3.29998400 | -0.90473000 |
| H | 5.14097600  | -2.50848800 | 0.65179300  |
| C | 6.53948900  | -4.27233500 | -1.89695800 |
| H | 5.63223900  | -5.98272800 | -2.84904000 |
| H | 7.17312800  | -2.55737000 | -0.74692800 |
| H | 7.43261100  | -4.29719800 | -2.51534400 |
| P | 2.32171200  | 0.36121200  | -1.13554400 |
| C | 2.43873300  | 2.06676800  | -1.81314100 |
| C | 2.65883500  | -0.73625800 | -2.57142500 |
| C | 3.80178300  | 0.22556400  | -0.06122900 |
| C | 2.47172900  | 3.16140700  | -0.89658800 |
| C | 2.32245300  | 2.30334600  | -3.18617200 |
| C | 1.57085300  | -1.01403600 | -3.41828600 |
| C | 3.86928200  | -1.40656600 | -2.78653300 |
| C | 3.61128000  | -0.23551400 | 1.24890100  |
| C | 5.08576600  | 0.60719900  | -0.47380800 |
| C | 2.41604700  | 4.42328800  | -1.45864600 |
| C | 2.64372400  | 3.04429000  | 0.58169100  |
| C | 2.23280800  | 3.60114300  | -3.72318400 |



|   |             |             |             |
|---|-------------|-------------|-------------|
| H | 2.29773700  | 1.46187600  | -3.86832300 |
| C | 1.70160100  | -1.91590200 | -4.47194600 |
| H | 0.61438600  | -0.53296000 | -3.22994600 |
| C | 3.99130800  | -2.33210600 | -3.82545700 |
| H | 4.71012000  | -1.24825300 | -2.12408900 |
| C | 4.68619300  | -0.31645000 | 2.13380300  |
| H | 2.60795300  | -0.49983200 | 1.57161400  |
| C | 6.16646500  | 0.49839100  | 0.40136600  |
| H | 5.23612400  | 1.00202300  | -1.47394000 |
| C | 2.27888900  | 4.64609400  | -2.82661700 |
| O | 2.47193000  | 5.62525000  | -0.79928700 |
| C | 3.88381300  | 3.34836500  | 1.11315300  |
| C | 1.62339800  | 2.70253600  | 1.52299700  |
| H | 2.13866400  | 3.76912800  | -4.79010300 |
| C | 2.91363200  | -2.58399300 | -4.67386800 |
| H | 0.85352400  | -2.11371600 | -5.12162700 |
| H | 4.92743600  | -2.86608800 | -3.95176400 |
| C | 5.96731000  | 0.04350900  | 1.70845100  |
| H | 4.52490200  | -0.65800900 | 3.15191900  |
| H | 7.16164400  | 0.78023300  | 0.06859300  |
| O | 2.22650000  | 5.99350100  | -3.07614200 |
| C | 2.29062900  | 6.63948800  | -1.79523400 |
| C | 4.17053200  | 3.29617900  | 2.47418600  |
| O | 5.00829900  | 3.72217700  | 0.41990000  |
| C | 1.91888400  | 2.68521300  | 2.88977700  |
| P | -0.01529700 | 2.11264300  | 0.89904900  |
| H | 3.00992300  | -3.30543900 | -5.48034000 |
| H | 6.80723800  | -0.02448900 | 2.39368400  |
| H | 1.34913500  | 7.16510600  | -1.60888000 |
| H | 3.14389300  | 7.32400400  | -1.77522100 |
| C | 3.19948000  | 2.97461700  | 3.39616200  |
| O | 5.48565600  | 3.61998900  | 2.68744200  |
| C | 6.05715600  | 3.84188600  | 1.38892100  |
| H | 1.13791300  | 2.44192300  | 3.59856300  |
| C | -1.10902600 | 2.17030100  | 2.37694400  |
| C | -0.55684300 | 3.51588300  | -0.14986500 |
| H | 3.40786000  | 2.94741200  | 4.45973000  |
| H | 6.47912200  | 4.85035300  | 1.34466300  |
| H | 6.81790100  | 3.07937300  | 1.19480700  |
| C | -2.18528100 | 3.05748600  | 2.51243300  |
| C | -0.94114100 | 1.16452100  | 3.34645600  |
| C | -0.99815800 | 3.23420900  | -1.44928700 |
| C | -0.48735900 | 4.84920100  | 0.27887800  |
| C | -3.06531900 | 2.94238800  | 3.59224600  |

|                  |             |             |             |
|------------------|-------------|-------------|-------------|
| H                | -2.34760500 | 3.83170600  | 1.77110500  |
| C                | -1.81261900 | 1.05460500  | 4.42729700  |
| C                | -1.36067100 | 4.26913900  | -2.31166300 |
| H                | -1.02487400 | 2.19995500  | -1.78195500 |
| C                | -0.87006700 | 5.88209600  | -0.57592900 |
| H                | -0.12308000 | 5.07714700  | 1.27610100  |
| C                | -2.88256700 | 1.94468000  | 4.55044200  |
| H                | -3.89950600 | 3.63347600  | 3.67765700  |
| H                | -1.68501500 | 0.25103600  | 5.14610600  |
| C                | -1.29917900 | 5.59414900  | -1.87494200 |
| H                | -1.68324700 | 4.04296000  | -3.32376100 |
| H                | -0.82423600 | 6.91206100  | -0.23273800 |
| H                | -3.57834100 | 1.84373900  | 5.37800600  |
| H                | -1.58135900 | 6.40137200  | -2.54486400 |
| H                | -0.14152600 | 0.43943700  | 3.22796600  |
| H                | -0.36422800 | -2.37865200 | -1.35881800 |
| H                | -2.23748600 | -1.18072300 | -0.42102600 |
| C                | -0.56037100 | -5.75719500 | 2.39248700  |
| C                | -1.09497700 | -6.15282100 | 1.14881700  |
| C                | -0.72440400 | -5.14038700 | 0.27722800  |
| N                | 0.09148300  | -4.59191700 | 2.30010700  |
| H                | -0.62468500 | -6.25943700 | 3.34896000  |
| H                | -1.67164800 | -7.03671400 | 0.91798300  |
| H                | -0.90864800 | -4.99491500 | -0.77683900 |
| N                | -0.02466100 | -4.23194600 | 1.00145700  |
| <b>(Z)-(S)-3</b> |             |             |             |
| C                | -4.55782300 | -0.73236800 | 1.53639300  |
| C                | -4.43598900 | -1.93839100 | 2.20589900  |
| C                | -3.08405400 | -2.30325200 | 2.03000800  |
| N                | -3.33569100 | -0.44437800 | 1.01965500  |
| H                | -5.39448500 | -0.06251700 | 1.40484800  |
| H                | -5.20722700 | -2.46664300 | 2.74730600  |
| H                | -2.56517900 | -3.17747200 | 2.40135700  |
| N                | -2.41823900 | -1.39807400 | 1.30638800  |
| C                | -2.96590000 | 0.68568300  | 0.15669600  |
| C                | -3.49465700 | 0.47173800  | -1.26905500 |
| H                | -4.59247500 | 0.46696500  | -1.24636800 |
| H                | -3.19880000 | 1.33679500  | -1.87583700 |
| C                | -2.98799800 | -0.81993400 | -1.92944900 |
| H                | -1.89237100 | -0.79111300 | -1.97816900 |
| H                | -3.25101500 | -1.67519000 | -1.29832100 |
| C                | -3.56685900 | -1.00085400 | -3.31272600 |
| C                | -4.77511600 | -1.68604600 | -3.49531700 |
| C                | -2.93688000 | -0.44764200 | -4.43498900 |
| C                | -5.34048800 | -1.81636100 | -4.76466100 |

|                    |             |             |             |
|--------------------|-------------|-------------|-------------|
| H                  | -5.27299600 | -2.12341300 | -2.63279800 |
| C                  | -3.49738400 | -0.57521200 | -5.70684800 |
| H                  | -1.99614800 | 0.08367900  | -4.30927500 |
| C                  | -4.70259600 | -1.26034000 | -5.87575000 |
| H                  | -6.27604200 | -2.35546600 | -4.88669500 |
| H                  | -2.99126300 | -0.14347800 | -6.56607200 |
| H                  | -5.13885700 | -1.36345600 | -6.86528300 |
| C                  | -3.44312900 | 2.00601500  | 0.73174800  |
| H                  | -4.14961000 | 2.56045800  | 0.11639300  |
| C                  | -3.06449200 | 2.51833500  | 1.90702300  |
| H                  | -3.47814200 | 3.48180300  | 2.20136500  |
| C                  | -2.09694900 | 1.90358100  | 2.87806200  |
| H                  | -2.60716200 | 1.75060300  | 3.83987000  |
| H                  | -1.76709600 | 0.91848200  | 2.53713300  |
| C                  | -0.85421300 | 2.79656800  | 3.12399300  |
| H                  | -0.17630200 | 2.25719500  | 3.79646000  |
| H                  | -0.32353200 | 2.93320600  | 2.17464300  |
| C                  | -1.19848700 | 4.14290100  | 3.71796800  |
| C                  | -1.47705500 | 4.26501300  | 5.08634200  |
| C                  | -1.28942400 | 5.28700300  | 2.91515600  |
| C                  | -1.83604900 | 5.49493600  | 5.63813300  |
| H                  | -1.40744300 | 3.38654900  | 5.72408700  |
| C                  | -1.64937700 | 6.52057200  | 3.46167700  |
| H                  | -1.07625000 | 5.20763900  | 1.85194700  |
| C                  | -1.92405800 | 6.62848100  | 4.82606800  |
| H                  | -2.04349200 | 5.56993700  | 6.70212000  |
| H                  | -1.71238200 | 7.39666300  | 2.82197100  |
| H                  | -2.20128800 | 7.58758400  | 5.25424800  |
| H                  | -1.87213100 | 0.65060400  | 0.13857500  |
| <b>(Z)-(R)-TS9</b> |             |             |             |
| P                  | -2.01041300 | 1.28071400  | -0.66906600 |
| C                  | -2.48641600 | -0.35302500 | -1.37373800 |
| C                  | -2.13774700 | 2.46581000  | -2.06219100 |
| C                  | -3.36967100 | 1.71090800  | 0.47023700  |
| C                  | -2.77581700 | -1.43603900 | -0.48604100 |
| C                  | -2.37992600 | -0.58473800 | -2.74879200 |
| C                  | -3.16783900 | 3.40715300  | -2.18556400 |
| C                  | -1.09889700 | 2.46682700  | -3.01062400 |
| C                  | -3.04003700 | 2.14941000  | 1.75885900  |
| C                  | -4.71785000 | 1.58020000  | 0.10528200  |
| C                  | -2.92890400 | -2.67780800 | -1.07380400 |
| C                  | -2.98753500 | -1.31111900 | 0.98455100  |
| C                  | -2.53063300 | -1.86417800 | -3.31431800 |
| H                  | -2.17013600 | 0.24347400  | -3.41397500 |
| C                  | -3.16641400 | 4.31880200  | -3.24421100 |

|   |             |             |             |
|---|-------------|-------------|-------------|
| H | -3.96751300 | 3.43941900  | -1.45467300 |
| C | -1.10972800 | 3.36435300  | -4.07590200 |
| H | -0.27690000 | 1.76410400  | -2.90391800 |
| C | -4.04693400 | 2.45132000  | 2.67602900  |
| H | -1.99401800 | 2.22484200  | 2.04166000  |
| C | -5.72180700 | 1.89837700  | 1.01837500  |
| H | -4.97879600 | 1.21278600  | -0.88236500 |
| C | -2.79340600 | -2.89924900 | -2.44369100 |
| O | -3.23579900 | -3.85808600 | -0.44675000 |
| C | -4.27501300 | -1.34933200 | 1.48449300  |
| C | -1.94537900 | -1.19475300 | 1.94920100  |
| H | -2.44554200 | -2.02484400 | -4.38293500 |
| C | -2.14488200 | 4.29623200  | -4.19376700 |
| H | -3.96830800 | 5.04709300  | -3.32383700 |
| H | -0.30406100 | 3.34655400  | -4.80396900 |
| C | -5.38752500 | 2.32737500  | 2.30614400  |
| H | -3.78486100 | 2.77483400  | 3.67879300  |
| H | -6.76457400 | 1.80504100  | 0.72844700  |
| O | -3.00007300 | -4.22371600 | -2.72178000 |
| C | -3.11262200 | -4.87812300 | -1.44763700 |
| C | -4.56805400 | -1.23065000 | 2.84173500  |
| O | -5.43801000 | -1.46311200 | 0.76864000  |
| C | -2.24858500 | -1.09674600 | 3.31019900  |
| P | -0.21928000 | -1.02268600 | 1.35361900  |
| H | -2.14801600 | 5.00579600  | -5.01585300 |
| H | -6.17166000 | 2.55953900  | 3.02069000  |
| H | -2.20415300 | -5.46006400 | -1.25796200 |
| H | -4.00712900 | -5.50419300 | -1.43923700 |
| C | -3.57232400 | -1.10621100 | 3.78585100  |
| O | -5.92407300 | -1.25699800 | 3.02745400  |
| C | -6.50581900 | -1.43028700 | 1.72610700  |
| H | -1.44353900 | -1.00350300 | 4.02871600  |
| C | 0.77080200  | -1.07079300 | 2.89472800  |
| C | 0.10979000  | -2.59717000 | 0.48716000  |
| H | -3.79686800 | -1.01781400 | 4.84255000  |
| H | -7.05208200 | -2.37861200 | 1.69390900  |
| H | -7.16127700 | -0.58290700 | 1.50850600  |
| C | 1.34756400  | -2.23553800 | 3.41609800  |
| C | 0.99671600  | 0.15454500  | 3.54378500  |
| C | 0.83248200  | -2.54654100 | -0.71281600 |
| C | -0.32765000 | -3.83563300 | 0.97794500  |
| C | 2.15149400  | -2.17056300 | 4.55587500  |
| H | 1.19742400  | -3.18841000 | 2.92207700  |
| C | 1.79248200  | 0.21694500  | 4.68498100  |

|    |             |             |             |
|----|-------------|-------------|-------------|
| C  | 1.14230900  | -3.72029400 | -1.39974200 |
| H  | 1.13964500  | -1.58005800 | -1.10285300 |
| C  | -0.00650700 | -5.00981400 | 0.29732200  |
| H  | -0.92483100 | -3.87737100 | 1.88354900  |
| C  | 2.37722700  | -0.94770200 | 5.18946500  |
| H  | 2.61299100  | -3.07618300 | 4.93814400  |
| H  | 1.98201500  | 1.17591700  | 5.15615100  |
| C  | 0.73047200  | -4.95371400 | -0.89008400 |
| H  | 1.70461400  | -3.67241600 | -2.32724300 |
| H  | -0.33462300 | -5.96819800 | 0.68966900  |
| H  | 3.01745000  | -0.89856500 | 6.06506400  |
| H  | 0.97636200  | -5.86968000 | -1.41938000 |
| H  | 0.56454300  | 1.06459000  | 3.13668600  |
| C  | 1.08390100  | 2.87418400  | -0.34770400 |
| C  | 2.12799400  | 1.91514000  | -0.42370700 |
| C  | 2.73600700  | 1.28843100  | 0.67687300  |
| Pd | 0.15332700  | 0.98497800  | 0.15343100  |
| C  | 3.59942900  | 0.06712500  | 0.46303100  |
| H  | 3.01399400  | -0.68450300 | -0.07955900 |
| H  | 4.43245000  | 0.33480200  | -0.19755200 |
| C  | 4.15079800  | -0.56095900 | 1.75094700  |
| H  | 4.84937500  | 0.13263300  | 2.22176300  |
| H  | 3.32508700  | -0.71217800 | 2.44844800  |
| C  | 4.82178100  | -1.88313800 | 1.47062400  |
| C  | 6.21552200  | -2.00696700 | 1.50317700  |
| C  | 4.05864200  | -3.01205600 | 1.13499700  |
| C  | 6.83365900  | -3.22591100 | 1.21256300  |
| H  | 6.81459600  | -1.13618000 | 1.75908800  |
| C  | 4.67023100  | -4.22997200 | 0.84071800  |
| H  | 2.97625800  | -2.93288700 | 1.10094600  |
| C  | 6.06315600  | -4.34185100 | 0.88007100  |
| H  | 7.91729900  | -3.30323000 | 1.24576000  |
| H  | 4.05859300  | -5.09053500 | 0.58146400  |
| H  | 6.54295600  | -5.29022100 | 0.65376200  |
| C  | 0.85578400  | 3.75257100  | 0.85999300  |
| H  | -0.15577500 | 4.17388400  | 0.82145300  |
| H  | 0.92182300  | 3.17359000  | 1.78763500  |
| C  | 1.89582000  | 4.89870400  | 0.94750600  |
| H  | 2.89227400  | 4.44499800  | 0.95161300  |
| H  | 1.80806500  | 5.53084300  | 0.05477000  |
| C  | 1.68507000  | 5.71613300  | 2.19847600  |
| C  | 2.24275800  | 5.28644800  | 3.41270500  |
| C  | 0.88955500  | 6.86861800  | 2.18951300  |
| C  | 2.00590300  | 6.00104300  | 4.58796200  |

|                      |             |             |             |
|----------------------|-------------|-------------|-------------|
| H                    | 2.86650800  | 4.39273400  | 3.41751600  |
| C                    | 0.65355800  | 7.58425400  | 3.36548600  |
| H                    | 0.45500000  | 7.20949400  | 1.25184300  |
| C                    | 1.21133600  | 7.15091800  | 4.57009300  |
| H                    | 2.44900800  | 5.66264200  | 5.52141800  |
| H                    | 0.03792200  | 8.47983400  | 3.34010700  |
| H                    | 1.03190300  | 7.70729400  | 5.48632700  |
| H                    | 0.75620700  | 3.29870400  | -1.29381700 |
| H                    | 2.43425600  | 1.58040300  | -1.41461200 |
| C                    | 6.48903500  | 2.41511300  | 2.47267300  |
| C                    | 5.45683300  | 2.52303100  | 3.42357500  |
| H                    | 7.55554500  | 2.33974600  | 2.64269000  |
| H                    | 5.52895900  | 2.54184000  | 4.50627400  |
| N                    | 4.47794900  | 2.58574800  | 1.47484100  |
| H                    | 2.46387000  | 1.55561700  | 1.68736800  |
| N                    | 4.25658400  | 2.60799000  | 2.81967900  |
| C                    | 5.80522200  | 2.45224800  | 1.25297100  |
| H                    | 6.19395300  | 2.39653300  | 0.24181600  |
| <b>(Z)-(R)-INT10</b> |             |             |             |
| P                    | -2.14599500 | 1.41143800  | -0.51948400 |
| C                    | -2.51342300 | -0.17328100 | -1.40164400 |
| C                    | -2.35740200 | 2.71011500  | -1.80833200 |
| C                    | -3.59183900 | 1.62449600  | 0.58659800  |
| C                    | -2.73024000 | -1.36063900 | -0.63270000 |
| C                    | -2.36184600 | -0.26174100 | -2.78896800 |
| C                    | -3.47646200 | 3.54697900  | -1.91303600 |
| C                    | -1.28189800 | 2.90937700  | -2.69267500 |
| C                    | -3.35227300 | 1.95983600  | 1.92524400  |
| C                    | -4.91157600 | 1.42843300  | 0.15319400  |
| C                    | -2.76254700 | -2.54740000 | -1.34041800 |
| C                    | -2.98772300 | -1.40177700 | 0.83634100  |
| C                    | -2.39078500 | -1.48849300 | -3.47942100 |
| H                    | -2.20397900 | 0.64291800  | -3.36350700 |
| C                    | -3.52520600 | 4.54631900  | -2.88804400 |
| H                    | -4.30940400 | 3.43008500  | -1.22964200 |
| C                    | -1.34013000 | 3.89248500  | -3.67849500 |
| H                    | -0.39534100 | 2.28901100  | -2.59530800 |
| C                    | -4.41454700 | 2.09731200  | 2.81935300  |
| H                    | -2.32729200 | 2.08372900  | 2.26384700  |
| C                    | -5.97393400 | 1.58789200  | 1.04167800  |
| H                    | -5.10384800 | 1.13253200  | -0.87351600 |
| C                    | -2.57916900 | -2.62272400 | -2.72030700 |
| O                    | -2.98739400 | -3.80569300 | -0.83865800 |
| C                    | -4.28241600 | -1.56267000 | 1.29118100  |
| C                    | -1.97473100 | -1.33798700 | 1.83694300  |

|   |             |             |             |
|---|-------------|-------------|-------------|
| H | -2.27100100 | -1.53578700 | -4.55595400 |
| C | -2.46398300 | 4.71747100  | -3.77735700 |
| H | -4.39782800 | 5.19055300  | -2.95110300 |
| H | -0.50356300 | 4.02423400  | -4.35895900 |
| C | -5.72650100 | 1.91535500  | 2.37781300  |
| H | -4.21797600 | 2.33946500  | 3.85963600  |
| H | -6.99402100 | 1.44738700  | 0.69480000  |
| O | -2.66817400 | -3.92961000 | -3.12840200 |
| C | -2.72179500 | -4.70681500 | -1.92152600 |
| C | -4.61381600 | -1.60324700 | 2.64377700  |
| O | -5.42098800 | -1.66936500 | 0.53337600  |
| C | -2.31656300 | -1.39658100 | 3.19113500  |
| P | -0.24648500 | -1.03915500 | 1.28556200  |
| H | -2.50631800 | 5.49383800  | -4.53584600 |
| H | -6.55419900 | 2.02215900  | 3.07297800  |
| H | -1.75300300 | -5.19282000 | -1.75665400 |
| H | -3.53326000 | -5.43357300 | -1.99498600 |
| C | -3.64948100 | -1.52279700 | 3.62440200  |
| O | -5.97108300 | -1.72874400 | 2.78629400  |
| C | -6.50942700 | -1.79766900 | 1.45720500  |
| H | -1.53526700 | -1.34068600 | 3.93906300  |
| C | 0.68223400  | -1.07707600 | 2.87420900  |
| C | 0.18726800  | -2.61541600 | 0.45162900  |
| H | -3.90413200 | -1.55649800 | 4.67763400  |
| H | -6.99745600 | -2.76726000 | 1.31136800  |
| H | -7.20979200 | -0.97133800 | 1.30893500  |
| C | 1.24594100  | -2.22758400 | 3.43955600  |
| C | 0.83487100  | 0.15101800  | 3.54044800  |
| C | 0.98980800  | -2.54852000 | -0.69617500 |
| C | -0.24686200 | -3.86709900 | 0.91162500  |
| C | 1.95742700  | -2.14997000 | 4.63902500  |
| H | 1.14440700  | -3.18522200 | 2.94232200  |
| C | 1.53170100  | 0.22653500  | 4.74490900  |
| C | 1.38738700  | -3.71434400 | -1.35134500 |
| H | 1.29643100  | -1.57453100 | -1.06750600 |
| C | 0.15824400  | -5.03375700 | 0.26286400  |
| H | -0.90695200 | -3.92434500 | 1.77174200  |
| C | 2.10031600  | -0.92624200 | 5.29476900  |
| H | 2.40567300  | -3.04755800 | 5.05501400  |
| H | 1.64677100  | 1.18479800  | 5.24274000  |
| C | 0.98094100  | -4.95927800 | -0.86588200 |
| H | 2.01339800  | -3.65145600 | -2.23642400 |
| H | -0.17165600 | -6.00038100 | 0.63315300  |
| H | 2.65901100  | -0.86765700 | 6.22423500  |

|    |            |             |             |
|----|------------|-------------|-------------|
| H  | 1.29462600 | -5.86882500 | -1.37024200 |
| H  | 0.40856300 | 1.04806400  | 3.09673600  |
| C  | 1.41101000 | 2.77929100  | -0.14283500 |
| C  | 2.21123400 | 1.62950200  | -0.07348800 |
| C  | 3.09189500 | 1.22394300  | 1.09170000  |
| Pd | 0.06649900 | 1.03391700  | 0.20287600  |
| C  | 3.59822700 | -0.21303300 | 0.91232300  |
| H  | 2.72315500 | -0.83700100 | 0.72188300  |
| H  | 4.21962100 | -0.26321200 | 0.00794200  |
| C  | 4.37838600 | -0.76481200 | 2.10966600  |
| H  | 5.24760500 | -0.12933400 | 2.31153200  |
| H  | 3.74020000 | -0.70593700 | 2.99968100  |
| C  | 4.83319300 | -2.19457300 | 1.90393500  |
| C  | 6.16564000 | -2.56260400 | 2.12784100  |
| C  | 3.93477200 | -3.18900600 | 1.48730400  |
| C  | 6.59015200 | -3.88160600 | 1.94960300  |
| H  | 6.87836100 | -1.80500500 | 2.44521100  |
| C  | 4.35300900 | -4.50639300 | 1.30331200  |
| H  | 2.89928800 | -2.93482300 | 1.29677600  |
| C  | 5.68449200 | -4.86002600 | 1.53614400  |
| H  | 7.62975100 | -4.14230900 | 2.12986200  |
| H  | 3.63470400 | -5.25245900 | 0.97388100  |
| H  | 6.01329400 | -5.88577000 | 1.39336900  |
| C  | 1.24828800 | 3.76461200  | 0.99109200  |
| H  | 0.22937300 | 4.17120500  | 0.98749300  |
| H  | 1.37884700 | 3.26017200  | 1.95482000  |
| C  | 2.24464500 | 4.94867300  | 0.91749200  |
| H  | 3.26445500 | 4.55441000  | 0.87774200  |
| H  | 2.07355900 | 5.50109000  | -0.01480700 |
| C  | 2.09177800 | 5.87058600  | 2.10312100  |
| C  | 2.60405400 | 5.49492600  | 3.35450500  |
| C  | 1.39966400 | 7.08311400  | 1.99999700  |
| C  | 2.43060600 | 6.31444800  | 4.46968600  |
| H  | 3.14364800 | 4.55526300  | 3.44070700  |
| C  | 1.22545000 | 7.90698600  | 3.11462100  |
| H  | 0.99660800 | 7.38519600  | 1.03581700  |
| C  | 1.74100400 | 7.52494300  | 4.35422600  |
| H  | 2.83791000 | 6.01077900  | 5.43071700  |
| H  | 0.68884000 | 8.84674300  | 3.01341300  |
| H  | 1.60875300 | 8.16474300  | 5.22248200  |
| H  | 1.17705100 | 3.17156000  | -1.13150700 |
| H  | 2.49934000 | 1.17348000  | -1.02195500 |
| C  | 6.02279600 | 3.39426400  | 0.95311300  |
| C  | 5.62066600 | 3.38489800  | 2.30463200  |



|                  |             |             |             |
|------------------|-------------|-------------|-------------|
| H                | 6.85323200  | 3.91999300  | 0.50472100  |
| H                | 6.06221100  | 3.90095700  | 3.14717300  |
| N                | 4.23160300  | 2.14723600  | 1.26119800  |
| H                | 2.56003600  | 1.30201200  | 2.03953700  |
| N                | 4.53458900  | 2.62503300  | 2.48987400  |
| C                | 5.10042500  | 2.58038100  | 0.31389600  |
| H                | 4.99094800  | 2.29253200  | -0.72110300 |
| <b>(Z)-(R)-3</b> |             |             |             |
| C                | 1.72058500  | -0.97486600 | -3.19344900 |
| C                | 1.70186600  | -1.46670900 | -4.48749900 |
| C                | 0.78698800  | -0.63237300 | -5.16475900 |
| N                | 0.86159400  | 0.07678300  | -3.15931500 |
| H                | 2.26524100  | -1.28187200 | -2.31235600 |
| H                | 2.26508700  | -2.30090900 | -4.87921300 |
| H                | 0.47780800  | -0.66987800 | -6.20136800 |
| N                | 0.27669700  | 0.30199200  | -4.35726000 |
| C                | 0.50648600  | 0.90688100  | -2.00762800 |
| H                | 1.05708900  | 0.47451800  | -1.16530500 |
| C                | -0.99870100 | 0.79029100  | -1.71005900 |
| H                | -1.21756200 | 1.41867500  | -0.84245900 |
| H                | -1.56192000 | 1.19997200  | -2.55436600 |
| C                | -1.45072200 | -0.65081900 | -1.42126400 |
| H                | -1.35246400 | -1.25038400 | -2.33283100 |
| H                | -0.78253600 | -1.09368700 | -0.67125100 |
| C                | -2.87385300 | -0.68349700 | -0.91727600 |
| C                | -3.14548000 | -0.62967200 | 0.45670700  |
| C                | -3.95173300 | -0.70386400 | -1.81150300 |
| C                | -4.45952500 | -0.59365600 | 0.92628900  |
| H                | -2.31918500 | -0.61267900 | 1.16321800  |
| C                | -5.26737200 | -0.66827200 | -1.34671600 |
| H                | -3.75549400 | -0.74821800 | -2.88024700 |
| C                | -5.52594500 | -0.61153100 | 0.02469800  |
| H                | -4.65040700 | -0.55827200 | 1.99559500  |
| H                | -6.09080900 | -0.68734700 | -2.05542000 |
| H                | -6.54950300 | -0.58595600 | 0.38753500  |
| C                | 0.94309800  | 2.34011500  | -2.22889200 |
| H                | 1.10608400  | 2.61777600  | -3.26687600 |
| C                | 1.09922800  | 3.24595100  | -1.25793600 |
| H                | 1.39442300  | 4.25674200  | -1.53906800 |
| C                | 0.83177500  | 3.01916700  | 0.20389500  |
| H                | 0.70826700  | 1.95243400  | 0.41697900  |
| H                | 1.68325500  | 3.35961400  | 0.80778500  |
| C                | -0.44239700 | 3.76799400  | 0.67955300  |
| H                | -0.23808000 | 4.84557900  | 0.69634700  |
| H                | -1.23955600 | 3.60994000  | -0.05498500 |

|   |             |            |            |
|---|-------------|------------|------------|
| C | -0.90431600 | 3.28804200 | 2.03446500 |
| C | -0.26446600 | 3.70531400 | 3.20908200 |
| C | -1.95219400 | 2.36330500 | 2.13623400 |
| C | -0.65876700 | 3.20906000 | 4.45256200 |
| H | 0.54721400  | 4.42673700 | 3.14784300 |
| C | -2.34939300 | 1.86350400 | 3.37735600 |
| H | -2.46529100 | 2.03269400 | 1.23707100 |
| C | -1.70232100 | 2.28417300 | 4.54089100 |
| H | -0.15361100 | 3.54672400 | 5.35343900 |
| H | -3.16775000 | 1.15067800 | 3.43288200 |
| H | -2.01056200 | 1.89915200 | 5.50880100 |
